# Supplementary material for: Can Nature-Based Solutions Deliver a Win-Win for Biodiversity and Climate Change Adaptation?
Source: Preprints.org preprint supplement (doi:10.20944/preprints202110.0336.v1), 2021-10-23
Supplement: Supplementary file 1 [file supplementary]

## S2 Supplementary tables

**Table S1:** Number of ecosystem health outcomes of each metric type, grouped by broad metric category.

| Broad metric category                         | Metric type                    | Number of outcomes |
|-----------------------------------------------|--------------------------------|--------------------|
| Biomass                                       | Habitat density                | 37                 |
|                                               | Stem density                   | 8                  |
|                                               | Canopy cover                   | 6                  |
|                                               | Litter cover                   | 5                  |
|                                               | Habitat extent                 | 24                 |
|                                               | Biomass                        | 40                 |
| Conservation status                           | Conservation status            | 1                  |
| Diversity                                     | Species richness               | 33                 |
|                                               | Species evenness               | 16                 |
|                                               | Species diversity              | 25                 |
|                                               | Generic richness               | 1                  |
|                                               | Family and above richness      | 2                  |
|                                               | Functional diversity           | 17                 |
|                                               | Habitat diversity              | 6                  |
| Ecosystem composition                         | Species abundance              | 21                 |
|                                               | Organism density               | 3                  |
|                                               | Taxa presence                  | 24                 |
|                                               | Community composition          | 13                 |
| Ecosystem functioning and population dynamics | Resistance                     | 3                  |
|                                               | Recovery rate                  | 4                  |
|                                               | Survival rate                  | 12                 |
|                                               | Growth rate                    | 6                  |
|                                               | Phenology                      | 1                  |
|                                               | Elevation rate                 | 6                  |
|                                               | Reproductive rate              | 5                  |
|                                               | Age structure                  | 19                 |
|                                               | Ecological vulnerability       | 2                  |
|                                               | Functional identity            | 15                 |
| Habitat quality                               | Habitat quality                | 16                 |
| Landscape structure                           | Connectivity and fragmentation | 5                  |
| Unspecified                                   | Perceived overall change       | 9                  |

**Table S2:** Results of the robustness assessment: percentage of interventions with each outcome direction for subsets of interventions.

| Dataset subset                                                                                                                                                 | Percentage of intervention-level ecosystem health outcomes |          |       |           |         | No. interventions |
|----------------------------------------------------------------------------------------------------------------------------------------------------------------|------------------------------------------------------------|----------|-------|-----------|---------|-------------------|
|                                                                                                                                                                | Positive                                                   | Negative | Mixed | No effect | Unclear |                   |
| Excluding interventions with poor or absent methods, or no comparator.                                                                                         | 71                                                         | 4        | 11    | 3         | 11      | 92                |
| Excluding interventions with poor or absent methods, or no comparator; and interventions with only one broad ecosystem health metric category.                 | 71                                                         | 5        | 15    | 5         | 3       | 59                |
| Excluding interventions with poor or absent methods, or no comparator; and interventions with only one or two broad ecosystem health metric categories.        | 51                                                         | 7        | 30    | 7         | 4       | 27                |
| Excluding interventions with poor or absent methods, or no comparator; and interventions with only one, two or three broad ecosystem health metric categories. | 46                                                         | 0        | 31    | 15        | 8       | 13                |

**Table S3:** Details on intervention type, habitat type, geographical regions and taxa studied for the species richness data used in the meta-analysis, across 30 interventions. In some cases, species richness was reported separately for different components of an intervention, so we subdivided these interventions for the meta-analysis.

| Feature of intervention or outcome | Category of feature       | Number of interventions |
|------------------------------------|---------------------------|-------------------------|
| Intervention type                  | Protection                | 1                       |
|                                    | Restoration               | 10                      |
|                                    | Management                | 4                       |
|                                    | Combination               | 9                       |
|                                    | Created habitats          | 5                       |
|                                    | Mixed created/non-created | 1                       |
| Habitat type                       | Forest                    | 10                      |
|                                    | Other terrestrial         | 15                      |
|                                    | Coastal/freshwater        | 4                       |
|                                    | Terrestrial combination   | 1                       |
| Geographical region                | Africa                    | 13                      |
|                                    | Asia + Pacific            | 9                       |
|                                    | Europe                    | 5                       |
|                                    | Latin America + Caribbean | 1                       |
|                                    | North America             | 2                       |
| Taxa studied                       | Plants                    | 27                      |
|                                    | Animals                   | 3                       |

**Table S4:** Examples of potential synergies and trade-offs between ecosystem health and climate change adaptation and mitigation outcomes.

| Intervention                                                                                                                                                                                             | Ecosystem health                                                                                                                                                                                                                                                                                 | Adaptation                                                                                                                                                              | Mitigation                                                                                                                                                                                                                                                                                                                                                                     |
|----------------------------------------------------------------------------------------------------------------------------------------------------------------------------------------------------------|--------------------------------------------------------------------------------------------------------------------------------------------------------------------------------------------------------------------------------------------------------------------------------------------------|-------------------------------------------------------------------------------------------------------------------------------------------------------------------------|--------------------------------------------------------------------------------------------------------------------------------------------------------------------------------------------------------------------------------------------------------------------------------------------------------------------------------------------------------------------------------|
| Water park consisting of a constructed wetland, buffer tanks, and recreational space (Liquete et al. 2016)                                                                                               | Positive: Higher biodiversity and landscape diversity than the control site, and several species including threatened invertebrates and a priority bird species were present that were absent at the control site.                                                                               | Positive: Improved water quality in terms of reduced dissolved organic carbon and nitrogen load, and flood mitigation.                                                  | Not assessed.                                                                                                                                                                                                                                                                                                                                                                  |
| Fire management, involving strategic burning of parts of savannah in the early dry season with the aim of suppressing more severe fires later in the dry season (Russell-Smith et al. 2015).             | Positive: Increased the chance of survival of tree, shrub, small mammal and bird taxa, as determined by thresholds of fire frequency and extent.                                                                                                                                                 | Positive: Reduced the frequency of wildfire, the size of fire patches and the continuous burnt area.                                                                    | Positive: Greenhouse gas emissions by an estimated 1067 tCO <sub>2</sub> e/yr.                                                                                                                                                                                                                                                                                                 |
| Decentralized government forestry policy, involving planting of trees on barren land, conserving degraded forests, and granting local people formal rights to use forest products (Paudyal et al. 2019). | Mixed: Area of dense forest, wetlands, and water bodies increased; habitat provision based on 7 indicators showed, for example, improvement in number of flora and fauna and integrity of aquatic ecosystems, but an increase in presence invasive plants and increased human-wildlife conflict. | Positive: Increased groundwater recharge and dry season flow, and provision of raw materials from dense forest, as well as reduced erosion and sedimentation in a lake. | Positive: Increased area of dense forest with over 100m <sup>3</sup> C/ha.                                                                                                                                                                                                                                                                                                     |
| Ban on shifting cultivation in less degraded forests, permitting harvesting of timber and non-timber forest products in restricted areas (Fedele et al. 2018)                                            | No effect: Higher tree species richness in protected than logged forest, but not statistically significant.                                                                                                                                                                                      | Negative: Water availability, water quality and harvested value of forest products were lower after the intervention.                                                   | Positive: Higher aboveground carbon in protected than logged forest (200tC/ha compared to 110tC/ha).                                                                                                                                                                                                                                                                           |
| Lowland wet grassland, reedbeds and fens across 22 RSPB reserves in England managed for biodiversity conservation and flood management (Fisher et al. 2011).                                             | Positive: Increased population size of target bird species compared to control areas, and indicators for favourable conservation status of wetland were met or progress was made towards them.                                                                                                   | Unclear: Effect of intervention on flooding was unclear and context dependent.                                                                                          | Mixed: Maintenance of waterlogged soils, burying felled trees in such soils, and compaction of soil by livestock reduced carbon dioxide emissions from organic soils. But, methane emissions increased from livestock enteric fermentation or bacterial fermentation in waterlogged soils, and nitrous oxide emissions increased from denitrification in wet, compacted soils. |

**Table S5:** Number of outcomes for each climate impact (CI) that were positive, negative or mixed, and that were coupled with positive, negative or mixed ecosystem health outcomes. Since these results are at the outcome level, interventions with mixed climate change adaptation outcomes overall may be represented in this table either as a single mixed outcome for one climate impact or more than one outcome across different climate impacts.

| Climate impact <sup>1</sup>   | Number of outcomes        |             |          |                           |             |          |                        |             |          |
|-------------------------------|---------------------------|-------------|----------|---------------------------|-------------|----------|------------------------|-------------|----------|
|                               | Positive ecosystem health |             |          | Negative ecosystem health |             |          | Mixed ecosystem health |             |          |
|                               | Positive CI               | Negative CI | Mixed CI | Positive CI               | Negative CI | Mixed CI | Positive CI            | Negative CI | Mixed CI |
| Biomass cover loss            | 12                        | 1           |          |                           | 1           |          |                        |             |          |
| Coastal erosion               | 5                         |             |          |                           |             |          |                        |             |          |
| Coastal inundation            | 5                         |             |          |                           |             |          |                        |             |          |
| Desertification               | 1                         |             |          |                           |             |          |                        |             |          |
| Drought                       | 1                         | 1           |          | 1                         |             |          | 1                      |             | 2        |
| Freshwater flooding           | 7                         |             |          |                           |             | 1        |                        |             |          |
| Increased pests               | 1                         |             |          |                           |             |          |                        |             |          |
| Loss of food production       | 23                        | 1           |          |                           |             |          |                        |             | 2        |
| Loss of other ecosystem goods | 5                         | 1           | 1        | 1                         |             |          | 4                      |             |          |
| Loss of timber production     | 5                         |             |          |                           | 2           |          |                        |             |          |
| Mudslides/Landslides          | 1                         |             |          |                           |             |          | 1                      |             |          |
| Other climate impact          | 2                         |             |          |                           |             |          |                        |             |          |
| Reduced soil quality          | 5                         |             |          |                           |             |          |                        |             |          |
| Reduced water availability    | 10                        | 5           | 1        |                           | 2           |          |                        |             |          |
| Reduced water quality         | 2                         | 2           |          |                           | 1           |          | 1                      |             |          |
| Soil erosion                  | 15                        |             | 1        |                           |             |          | 1                      |             | 2        |
| Storm surge                   | 3                         |             |          |                           |             |          |                        |             |          |
| Wildfire                      | 3                         |             |          |                           |             |          |                        |             |          |
| Wind damage                   | 2                         |             |          |                           |             |          |                        |             |          |

<sup>1</sup> The following climate impacts that were identified in Chausson, Turner et al. (2020) were not found for any of the interventions that had ecosystem health outcomes: avalanche, decreasing wet season, land degradation, increased incidence/changing distribution of disease, glacial retreat and decreased snow cover, invasive species damage, longer dry season, change in phenology, waterlogging of soil, coastal saltwater intrusion, urban heat island.

**Table S6:** Outcome directions for interventions with all three outcome types reported: ecosystem health, climate change adaptation, and climate change mitigation.

| Intervention ID | Study                     | Outcome Direction |            |            |
|-----------------|---------------------------|-------------------|------------|------------|
|                 |                           | Ecosystem health  | Adaptation | Mitigation |
| INT-071-1       | Ahammad et al. 2013       | Positive          | Positive   | Positive   |
| INT-025-4       | Russell-Smith et al. 2015 | Positive          | Positive   | Positive   |
| INT-102-1       | Krauss et al. 2017        | Positive          | Positive   | Positive   |
| INT-033-1       | Mekuria et al. 2015       | Mixed             | Mixed      | Unclear    |
| INT-038-1       | Schmiedel et al. 2017     | Positive          | Positive   | Positive   |
| INT-229-1       | Jiang and Zhang 2016      | Positive          | Mixed      | Positive   |
| INT-124-1       | Brown et al. 2011         | Positive          | Positive   | Positive   |
| INT-157-1       | Fisher et al. 2011        | Positive          | Unclear    | Mixed      |
| INT-174-1       | Balthazar et al. 2015     | Mixed             | Mixed      | Mixed      |
| INT-252-1       | Fedele et al. 2018        | Negative          | Mixed      | Negative   |
| INT-252-2       | Fedele et al. 2018        | Positive          | Negative   | Positive   |
| INT-252-3       | Fedele et al. 2018        | Positive          | Negative   | Positive   |
| INT-253-1       | Paudyal et al. 2019       | Positive          | Positive   | Positive   |
| INT-264-1       | Siraw et al. 2020         | Positive          | Positive   | Positive   |
| INT-260-1       | Mora-Garcia et al. 2020   | Positive          | Positive   | Positive   |

## References

- Ahammad, Ronju, Paramesh Nandy, and Panna Husnain. 2013. "Unlocking Ecosystem Based Adaptation Opportunities in Coastal Bangladesh." *Journal of Coastal Conservation* 17(4): 833–40.
- Balthazar, Vincent, Veerle Vanacker, Armando Molina, and Eric F. Lambin. 2015. "Impacts of Forest Cover Change on Ecosystem Services in High Andean Mountains." *Ecological Indicators* 48: 63–75. <http://dx.doi.org/10.1016/j.ecolind.2014.07.043>.
- Brown, Douglas R. et al. 2011. "Poverty Alleviation and Environmental Restoration Using the Clean Development Mechanism: A Case Study from Humbo, Ethiopia." *Environmental Management* 48(2): 322–33.
- Chausson, Alexandre et al. 2020. "Mapping the Effectiveness of Nature-Based Solutions for Climate Change Adaptation." *Global Change Biology* (June): 1–22.
- Fedele, Giacomo, Bruno Locatelli, Houria Djoudi, and Matthew J. Colloff. 2018. "Reducing Risks by Transforming Landscapes: Cross-Scale Effects of Land-Use Changes on Ecosystem Services." *PLoS ONE* 13(4): 1–21.
- Fisher, Brendan et al. 2011. "Impacts of Species-Led Conservation on Ecosystem Services of Wetlands: Understanding Co-Benefits and Tradeoffs." *Biodiversity and Conservation* 20(11): 2461–81.
- Jiang, Chong, and Linbo Zhang. 2016. "Effect of Ecological Restoration and Climate Change on Ecosystems: A Case Study in the Three-Rivers Headwater Region, China." *Environmental Monitoring and Assessment* 188(6). <http://dx.doi.org/10.1007/s10661-016-5368-2>.
- Krauss, Ken W. et al. 2017. "Created Mangrove Wetlands Store Belowground Carbon and Surface Elevation Change Enables Them to Adjust to Sea-Level Rise /704/158/854 /704/158/4016 Article." *Scientific Reports* 7(1): 1–11. <http://dx.doi.org/10.1038/s41598-017-01224-2>.
- Liquete, Camino et al. 2016. "Integrated Valuation of a Nature-Based Solution for Water Pollution Control. Highlighting Hidden Benefits." *Ecosystem Services* 22(September): 392–401. <http://dx.doi.org/10.1016/j.ecoser.2016.09.011>.
- Mekuria, Wolde et al. 2015. "Restoring Aboveground Carbon and Biodiversity: A Case Study from the Nile Basin, Ethiopia." *Forest Science and Technology* 11(2): 86–96. <http://dx.doi.org/10.1080/21580103.2014.966862>.
- Mora-Garcia, Chime, Roberto G. Campos, and Romell A. Seronay. 2020. "Perceived Ecosystem Services towards the Conservation of Agusan Marsh Wildlife Sanctuary in Mindanao, Philippines." *International Journal of Conservation Science* 11(1): 199–208.
- Paudyal, Kiran et al. 2019. "Spatial Assessment of the Impact of Land Use and Land Cover Change on Supply of Ecosystem Services in Phewa Watershed, Nepal." *Ecosystem Services* 36(March 2018): 100895. <https://doi.org/10.1016/j.ecoser.2019.100895>.
- Russell-Smith, Jeremy et al. 2015. "Deriving Multiple Benefits from Carbon Market-Based Savanna Fire Management: An Australian Example." *PLoS ONE* 10(12): 1–21.
- Schmiedel, Ute, Michael Kruspe, Lynn Kayser, and Noel Oettlé. 2017. "The Ecological and Financial Impact of Soil Erosion and Its Control – A Case Study from the Semiarid Northern Cape Province, South Africa." *Land Degradation and Development* 28(1): 74–82.
- Siraw, Zewdu, Woldeamlak Bewket, and Mekonnen Adnew Degefu. 2020. "Effects of Community-Based Watershed Development on Landscape Greenness and Vegetation Cover in the

Northwestern Highlands of Ethiopia.” *Earth Systems and Environment* 4(1): 245–56.  
<https://doi.org/10.1007/s41748-019-00127-8>.
