# Supplementary material for: Can Nature-Based Solutions Deliver a Win-Win for Biodiversity and Climate Change Adaptation?
Source: Preprints.org preprint supplement (doi:10.20944/preprints202110.0336.v1), 2021-10-23
Supplement: Supplementary file 2 [file supplementary]

Archive with 6 entries (6 files):
- Supplementary material preprint Key et al. 2021/Dataset 1 ecosystem health outcome coding.xlsx
- Supplementary material preprint Key et al. 2021/Dataset 2 meta-analysis coding.xlsx
- Supplementary material preprint Key et al. 2021/S1 Supplementary methods.pdf
- Supplementary material preprint Key et al. 2021/S2 Supplementary tables.pdf
- Supplementary material preprint Key et al. 2021/S3 Supplementary figures.pdf
- Supplementary material preprint Key et al. 2021/S4 Supplementary results.pdf
