# Supplementary material for: Can Nature-Based Solutions Deliver a Win-Win for Biodiversity and Climate Change Adaptation?
Source: Preprints.org preprint supplement (doi:10.20944/preprints202110.0336.v1), 2021-10-23
Supplement: Supplementary file 2 [file supplementary › Supplementary material preprint Key et al. 2021/Dataset 1 ecosystem health outcome coding.xlsx]

## Sheet: Master sheet
Paper	Intervention ID	EH metric ID	Description	Intervention_type	Habitat_type	Broad_habitat_type	Country	Income group	Geographical region	Conflict of interest declared	Author-intervention-funding relationship	If yes, what?	Biophysical or economic assessment of biophysical	Social	Secondary	Secondary data link	Methodology	Control	Modelled scenario	Historical baseline	Other2	None	Intervention comparison	Threshold	Metric type	Broad EH metric category	Ecosystem health metric details	Kingdom	Broad taxa	Int level broad taxa	Animal class or paraphyletic group	Plant info	Taxa description	Includes a non-living component	Native composition	Int level native composition	Ecosystem component	Direction of effect	Outcome details	Data collection method
Assisted natural regeneration with fencing central and northern zones of Burkina Faso	INT-041-1	1a	Assisted natural regeneration: fencing of degraded areas of rangeland to exclude animal browsing and allow trees to grow.	Combination	Tropical and subtropical forests	Forest	Burkina Faso	Low income	Africa	No conflict declared	Yes	Author(s) associated with intervention	X				Detailed	X							Sp ri	Diversity		Plants	Plants	Just plants		Trees	Trees		Unclear	Unclear/partially unclear	Aboveground	Positive	The average number of tree species per hectare in fenced areas increased to ~double that in non-fenced areas (11 vs. 5, 7 vs. 4, 9 vs. 4 spp/ha inside vs. outside fencing). General trend of increasing number of tree species as an area of degraded land was protected for longer.	Visual surveys
Assisted natural regeneration with fencing central and northern zones of Burkina Faso	INT-041-1	1b	Assisted natural regeneration: fencing of degraded areas of rangeland to exclude animal browsing and allow trees to grow.	Combination	Tropical and subtropical forests	Forest	Burkina Faso	Low income	Africa	No conflict declared	Yes	Author(s) associated with intervention	X				Detailed	X							Stem dens	Biomass		Plants	Plants	Just plants		Trees	Trees		Unclear	Unclear/partially unclear	Aboveground	Positive	~5-5.5x more trees/hectare inside than outside fencing (1001 vs. 181, 410 vs. 78, 679 vs. 125, no. trees/ha inside vs. outside fencing).	Visual surveys
Tradeoffs in the Rehabilitation of a Succulent Karoo Rangeland	INT-044-1	2a	Transplantation of mature plants (a succulent species), planted at least 2m apart and watered for 2 weeks.	Restoration	Deserts and xeric shrublands	Other terrestrial	South Africa	Upper middle income	Africa	No conflict declared	Yes	Field experiment implemented by author(s)	X				Detailed	X							Veg ext	Biomass		Plants	Plants	Just plants		Other plants	Almost exclusively just the transplanted species: Brownus pseudoschlichtianus; also annual plants.		Native	Native	Aboveground	Positive	Plant cover increased over time, withstanding a general decline in cover in the drought year; the cover became significantly higher than the control group (5% for inervention vs. 1.5% for control). The cover of also annuals signficantly increased in the second year after the intervention was initiated, but not significantly differently to the control. The authors stated that the plant cover retur…	Visual surveys
Tradeoffs in the Rehabilitation of a Succulent Karoo Rangeland	INT-044-1	2b	Transplantation of mature plants (a succulent species), planted at least 2m apart and watered for 2 weeks.	Restoration	Deserts and xeric shrublands	Other terrestrial	South Africa	Upper middle income	Africa	No conflict declared	Yes	Field experiment implemented by author(s)	X				Detailed	X							Sp ri	Diversity		Plants	Plants	Just plants		Grasses & other plants	Annuals, perennials		Native	Native	Aboveground	No effect	Species richness did not differ significantly compared to the control.	Visual surveys
Talking Big: Lessons Learned from a 9000 Hectare Restoration in the Northern Tallgrass Prairie	INT-050-1	3a	The Glacial Ridge Project: reconnect a cluster of 14 fragmented prairie-wetland remnants (totaling 5200 ha) by restoring the habitat and hydrology of the 9000 ha core area; [actions involve] plugging (installing a clay "stopper" to prevent flow), filling, compacting, and re-grading previously excavated soil to the greatest extent possible; some of the ditches could not be entirely decommissioned …	Restoration	Temperate grasslands, Wetlands	Other terrestrial	United States of America	High income	North America	No conflict declared	Yes	Author(s) associated with intervention & funding	X		X	Gerla, P. J., Cornett, M. W., Ekstein, J. D., & Ahlering, M. A. (2012). Talking big: Lessons learned from a 9000 hectare restoration in the northern tallgrass prairie. Sustainability, 4(11), 3066–3087. https://doi.org/10.3390/su4113066	Secondary data so NA						X		Veg dens	Biomass		Plants	Plants	Just plants		Grasses & other plants	Graminoids and forbs		Native	Native	Aboveground	Positive	Higher percent cover of native graminoid and forb spp for blocks with higher frequencies of prescribed fire and mowing. The 1150ha areas was split into 65.75ha blocks.	Visual surveys
Talking Big: Lessons Learned from a 9000 Hectare Restoration in the Northern Tallgrass Prairie	INT-050-1	3b	The Glacial Ridge Project: reconnect a cluster of 14 fragmented prairie-wetland remnants (totaling 5200 ha) by restoring the habitat and hydrology of the 9000 ha core area; [actions involve] plugging (installing a clay "stopper" to prevent flow), filling, compacting, and re-grading previously excavated soil to the greatest extent possible; some of the ditches could not be entirely decommissioned …	Restoration	Temperate grasslands, Wetlands	Other terrestrial	United States of America	High income	North America	No conflict declared	Yes	Author(s) associated with intervention & funding	X		X	Gerla, P. J., Cornett, M. W., Ekstein, J. D., & Ahlering, M. A. (2012). Talking big: Lessons learned from a 9000 hectare restoration in the northern tallgrass prairie. Sustainability, 4(11), 3066–3087. https://doi.org/10.3390/su4113067	Secondary data so NA						X		Sp ri	Diversity		Plants	Plants	Just plants		Grasses & other plants	Graminoids and forbs		Native	Native	Aboveground	Positive	Higher species richness of native graminoid and forb spp for blocks with higher frequencies of prescribed fire and mowing. The 1150ha areas was split into 65.75ha blocks.	Visual surveys
Talking Big: Lessons Learned from a 9000 Hectare Restoration in the Northern Tallgrass Prairie	INT-050-1	3c	The Glacial Ridge Project: reconnect a cluster of 14 fragmented prairie-wetland remnants (totaling 5200 ha) by restoring the habitat and hydrology of the 9000 ha core area; [actions involve] plugging (installing a clay "stopper" to prevent flow), filling, compacting, and re-grading previously excavated soil to the greatest extent possible; some of the ditches could not be entirely decommissioned …	Restoration	Temperate grasslands, Wetlands	Other terrestrial	United States of America	High income	North America	No conflict declared	Yes	Author(s) associated with intervention & funding	X		X	Cornett, M.; Nixon, B.; Arikian, M. The Nature Conservancy, Minneapolis, MN, USA, unpublished data. AND for threshold definitions: Brown, J.; Cornett, M.; Ekstein, J.; Gerla, P.; Wahl, S. Master Plan for Restoration, Management, and Monitoring at Glacial Ridge; The Nature Conservancy: Minneapolis, MN, USA, 2005.	Secondary data so NA					X		X	Sp ri	Diversity		Plants	Plants	Just plants		Other plants	Plant species characteristic of the target community		Native	Native	Aboveground	Positive	60% of blocks met or exceeded the 25% threshold for characteristic native plant species. The 1150ha areas was split into 65.75ha blocks.	Visual surveys
Talking Big: Lessons Learned from a 9000 Hectare Restoration in the Northern Tallgrass Prairie	INT-050-1	3d	The Glacial Ridge Project: reconnect a cluster of 14 fragmented prairie-wetland remnants (totaling 5200 ha) by restoring the habitat and hydrology of the 9000 ha core area; [actions involve] plugging (installing a clay "stopper" to prevent flow), filling, compacting, and re-grading previously excavated soil to the greatest extent possible; some of the ditches could not be entirely decommissioned …	Restoration	Temperate grasslands, Wetlands	Other terrestrial	United States of America	High income	North America	No conflict declared	Yes	Author(s) associated with intervention & funding	X		X	Cornett, M.; Nixon, B.; Arikian, M. The Nature Conservancy, Minneapolis, MN, USA, unpublished data. AND for threshold definitions: Brown, J.; Cornett, M.; Ekstein, J.; Gerla, P.; Wahl, S. Master Plan for Restoration, Management, and Monitoring at Glacial Ridge; The Nature Conservancy: Minneapolis, MN, USA, 2005.	Secondary data so NA					X		X	Veg dens	Biomass		Plants	Plants	Just plants		Other plants	Plant species characteristic of the target community		Native	Native	Aboveground	Positive	Over 70% of blocks met or exceeded the 75% cover target for native vegetation.	Visual surveys
Microclimate and vegetation function as indicators of forest thermodynamic efficiency	INT-052-1	4a	Management of a stand of mixed-species composition and age, comprising 82-year-old P. sylvestris and 49-year-old F. sylvatica	Management	Temperate forests	Forest	Germany	High income	Europe	No conflict declared	No		X				Detailed						X		Fun id	Ecosystem functioning and population dynamics	CSR index of vegetation function	Plants	Plants	Just plants		Trees & other plants	Primary tree species were P. sylvestris and F. sylvatica.		Unclear	Unclear/partially unclear	Aboveground	Unclear	The old-growth, managed stand had a similar functional index to the Fagus sylvatica stand, but a considerably lower functional index than the Pinus sylvestris stand; the authors attribute this to the latter having widespread occurrence of stress-tolerant species, in an otherwise species-poor plot. The old-growth, managed stand had a higher proportion of stress-tolerant and lower proportion of rud…	Visual surveys
Microclimate and vegetation function as indicators of forest thermodynamic efficiency	INT-052-2	4.1a	Carpathian Biosphere Reserve: the core of the old-growth forest covers 11 860 ha, is original in its structure and has been subject to very little anthropogenic disturbance or management activity. The tree composition is uniform, comprising 97% F slyvatica.	Protection	Temperate forests	Forest	Ukraine	Lower middle income	Europe	No conflict declared	No		X				Detailed	X							Fun id	Ecosystem functioning and population dynamics	CSR index of vegetation function	Plants	Plants	Just plants		Trees & other plants	97% of trees were Fagus sylvatica; other recoded species were e.g. Dryop- teris dilata, Melica uniflora, Carex pendula, Paris quadrifolia are characteristic of long-establisehd and undisturbd forest sites.		Native	Native	Aboveground	Positive	Overall, the old-growth forest had a higher complexity score overall than the control. The old-growth forest had a higher proportion of stress-tolernt species, and a lower proportion of ruderal species than the control (the buffer zone of the forest reserve, which had more human disturbance, including sustainable forestry). The proportion of competitive species was the same between old-growth for…	Visual surveys
Microclimate and vegetation function as indicators of forest thermodynamic efficiency	INT-052-3	4.2a	Buffer zone of Carpathian Biosphere Reserve: A greater degree of human intervention and sustainable forestry is allowed in a 3300-ha area of buffer zone.	Management	Temperate forests	Forest	Ukraine	Lower middle income	Europe	No conflict declared	No		X				Detailed						X		Fun id	Ecosystem functioning and population dynamics	CSR index of vegetation function	Plants	Plants	Just plants		Trees & other plants	97% of trees were Fagus sylvatica; other recoded species were e.g. Dryop- teris dilata, Melica uniflora, Carex pendula, Paris quadrifolia are characteristic of long-establisehd and undisturbd forest sites.		Native	Native	Aboveground	Unclear	The buffer zone had a lower proportion of stress-tolernt species, and a higher proportion of ruderal species than the old growth forest. The proportion of competitive species was the same between old-growth forest and the buffer zone. The buffer zone's understorey vegetation also had a greater proportion of species associated with disturbance and secondary woodland communities, whilst the old-gro…	Visual surveys
Evaluating Social and Ecological Vulnerability of Coral Reef Fisheries to Climate Change	INT-053-1	5a	Well established no-take National Marine Parks managed by the Kenya Wildlife Service.	Protection	Coral reefs	Coastal/marine/freshwater	Kenya	Lower middle income	Africa	No conflict declared	No		X				Detailed	X							Ecol vul	Ecosystem functioning and population dynamics	Ecological vulnerability	Animals	Animals	Just animals	Anthozoa, pisces				Unclear	Unclear/partially unclear	Aquatic	Positive	The marine parks had a 'marginally' but significantly lower ecological vulnerability to climate change than the control (heavily fished reefs), and a non-significantly lower vulnerability than the community-managed fishery closures. Specifically, the marine mark had lower climate sensitivities among coral and fish assemblages than the control. However, there was variation in vulnerability between…	Visual surveys
Evaluating Social and Ecological Vulnerability of Coral Reef Fisheries to Climate Change	INT-053-2	5.1a	Recently established community co-managed fisheries closures ("tengefus" in Swahili)	Combination	Coral reefs	Coastal/marine/freshwater	Kenya	Lower middle income	Africa	No conflict declared	No		X				Detailed	X							Ecol vul	Ecosystem functioning and population dynamics	Ecological vulnerability	Animals	Animals	Just animals	Anthozoa, pisces				Unclear	Unclear/partially unclear	Aquatic	Positive	The community-managed fishery closures had a 'marginally' but significantly lower ecological vulnerability to climate change than the control (heavily fished reefs), and a non-significantly higher vulnerability than the no-take marine park. The vulnerability varied across sites, with high exposure and sensitivity, and low recovery potential leading to high vulnerability in one community-managed f…	Visual surveys
Species-rich semi-natural grasslands have a higher resistance but a lower resilience than intensively managed agricultural grasslands in response to climate anomalies	INT-055-1	6a	Semi-natural grasslands belonging to a Natura 2000 area; Through the designation of conservation and protection areas, which may also be privately owned, the network aims to ensure sustainable management.	Protection	Coastal, Temperate grasslands, Streams, rivers, riparian	Terrestrial-aquatic/coastal combination	Netherlands	High income	Europe	No conflict declared	No		X				Detailed						X		Resis	Ecosystem functioning and population dynamics	Resistance to drought and high temperatures	Plants	Plants	Just plants		Grasses & other plants			Unclear	Unclear/partially unclear	Aboveground	Unclear	Semi-natural grasslands had a higher resistance to drought and temperature anomalies than agricultural grassland. This difference was largest in coastal dunes and riparian grasslands; but was insignificant in sady soils, fens and sea clay. Note: there was more error in the model of vegetation response in agricultural grasslands. NDVI was used as an indicator of biomass, and its response to temper…	Remote sensing
Species-rich semi-natural grasslands have a higher resistance but a lower resilience than intensively managed agricultural grasslands in response to climate anomalies	INT-055-1	6b	Semi-natural grasslands belonging to a Natura 2000 area; Through the designation of conservation and protection areas, which may also be privately owned, the network aims to ensure sustainable management.	Protection	Coastal, Temperate grasslands, Streams, rivers, riparian	Terrestrial-aquatic/coastal combination	Netherlands	High income	Europe	No conflict declared	No		X				Detailed						X		Resil	Ecosystem functioning and population dynamics	Resilience to drought and high temperatures	Plants	Plants	Just plants		Grasses & other plants			Unclear	Unclear/partially unclear	Aboveground	Unclear	Semi-natural grasslands were less resilient compared to agricultural grasslands. This difference was largest in coastal dunes and fens, but insignificant with in sea clay, sandy areas, and riparian grasslands (perhaps because sandy areas drain water quickly and so become short of water independent of the species composition, whilst riparian vegetation may be less likely to be short of water indep…	Remote sensing
Shifting sands? Coastal protection by sand banks, beaches and dunes	INT-056-1	7a	Planting dominant native grasses, such as Ammophila species, in newly restored sand dunes (sand transported from nearby). The grasses stabilise the sand and function as dune builders due to extensive root systems and their ability to grow under constant sand burial. This intervention was part of the THESEUS project, which aims to test technologies to aid management, restoration and creation of sa…	Restoration	Coastal	Coastal/marine/freshwater	United Kingdom	High income	Europe	No conflict declared	No		X				Detailed			X					Veg dens	Biomass		Plants	Plants	Just plants		Grasses	Ammophila (marram grass)		Native	Unclear/partially unclear	Aboveground	Positive	Increase in Ammophila percentage cover in quadrats over time - the plugs successfully established. Growth was greatest at the base of the dune, then the mid-level and lowest at the top.	Visual surveys
Shifting sands? Coastal protection by sand banks, beaches and dunes	INT-056-1	7b	Planting dominant native grasses, such as Ammophila species, in newly restored sand dunes (sand transported from nearby). The grasses stabilise the sand and function as dune builders due to extensive root systems and their ability to grow under constant sand burial. This intervention was part of the THESEUS project, which aims to test technologies to aid management, restoration and creation of sa…	Restoration	Coastal	Coastal/marine/freshwater	United Kingdom	High income	Europe	No conflict declared	No		X				Detailed			X					Sp ri	Diversity		Plants	Plants	Just plants		Grasses & other plants	7 species typically associated with sand dune habitats; the remainder were generalist ruderal weeds.		Unclear	Unclear/partially unclear	Aboveground	Unclear	30 species in addition to Ammophila were recorded in the quadrats, but at very low abundance, and this did not change in abundance over time. So, plant community diversity was limited, perhaps due to limited movement of propagules from nearby natural sand dunes.	Visual surveys
Frost hardiness vs. growth performance in trembling aspen: an experimental test of assisted migration	INT-060-1	8a	Assisted migration of aspen (reforestation stock) to more appropriate current and predicted climates (NW in North America). Common garden experiment.	Restoration	Boreal forests and taiga	Forest	Canada	High income	North America	No conflict declared	Yes	Field experiment implemented by author(s) & int assoc w funding	X				Detailed	X							Age str	Ecosystem functioning and population dynamics		Plants	Plants	Just plants		Trees	Populus tremuloides (trembling aspen)		Native assisted migrant	Native	Aboveground	Positive	Provenances moved north-west were taller than local provenances growing in the same location (e.g. 34% taller for provenances moved 1600km NW from Minnesota to Alberta). Such increased growth was not associated with reduced survival, despite higher cell lysis from early frost than local provenances (all provenances are hardy enough to withstand unlikely cold evens like -30C in September).	Visual surveys
Frost hardiness vs. growth performance in trembling aspen: an experimental test of assisted migration	INT-060-1	8b	Assisted migration of aspen (reforestation stock) to more appropriate current and predicted climates (NW in North America). Common garden experiment.	Restoration	Boreal forests and taiga	Forest	Canada	High income	North America	No conflict declared	Yes	Field experiment implemented by author(s) & int assoc w funding	X				Detailed	X							Biom	Biomass		Plants	Plants	Just plants		Trees	Populus tremuloides (trembling aspen)		Native assisted migrant	Native	Aboveground	Positive	Provenances moved north-west had greater biomass than local provenances growing in the same location (e.g. 84% more biomass for provenances moved 1600km NW from Minnesota to Alberta). Such increased growth was not associated with reduced survival, despite higher cell lysis from early frost than local provenances (all provenances are hardy enough to withstand unlikely cold evens like -30C in Septe…	Visual surveys
Frost hardiness vs. growth performance in trembling aspen: an experimental test of assisted migration	INT-060-1	8c	Assisted migration of aspen (reforestation stock) to more appropriate current and predicted climates (NW in North America). Common garden experiment.	Restoration	Boreal forests and taiga	Forest	Canada	High income	North America	No conflict declared	Yes	Field experiment implemented by author(s) & int assoc w funding	X				Detailed	X							Ph	Ecosystem functioning and population dynamics	Phenology	Plants	Plants	Just plants		Trees	Populus tremuloides (trembling aspen)		Native assisted migrant	Native	Aboveground	No effect	"Northward movement of sotuhern provenances would typically lead to a similar or slightly delayed onset of grwoth of introduced genotypes relative to local provenances, and therefore northward transfers would not pose additional risks [to e.g. frost]"	Visual surveys
Co-evolution of wetland landscapes, flooding, and human settlement in the Mississippi River Delta Plain	INT-063-1	9a	Flood control structure: Mississippi River was connected to Atchafalaya Bay by the Old River Control Structure. This connected water and sediment between the river and the bay, providing a floodway to the coast in times of high water. It acted as an 'outlet' to help protect urban centers downstream at Baton Rouge and New Orleans from flooding conditions.	Management	Coastal, Streams, rivers, riparian	Coastal/marine/freshwater	United States of America	High income	North America	No conflict declared	No		X				Detailed	X							Veg dens	Biomass		Plants	Plants	Just plants		Trees & grasses & other plants	Sagitarria platyphylla was the dominant vegetation in the summer and fall in newly colonised emerging lands. Older lobes in the basin have a mixed community composed of Colocasia esculenta, Phragmites australis, Polygonum punctatum, Typha spp., Schoenoplectus spp., and Zizan- iopsis miliacea. Salix nigra is the dominant vegetation present at levees of the older lobes, with an understory of C. esc…		Unclear	Unclear/partially unclear	Aboveground	Positive	Vegetation percentage cover change between 1949 and 2013 was compared between the basin where the intervention took place, which had higher sediment load, and the control basin, with a engineered intervention and a lower sediment load. Overall, most coastal habitats expanded in the intervention basin, whilst in the control most were lost to coastal inundation, with a slight expansion of salt mars…	Remote sensing
Adaptive forest landscape restoration as a contribution to more resilient ecosystems in the Shouf Biosphere Reserve (Lebanon)	INT-065-1	10a	Established species-diverse "woodland islets" in extensive overgrazed areas; planting of seedlings in 15 fenced plots. Restoration occurring within a protected area.	Combination	Montane/Alpine	Other terrestrial	Lebanon	Upper middle income	West Asia	No conflict declared	Yes	Field experiment implemented by author(s)	X				Detailed			X					Sur r	Ecosystem functioning and population dynamics		Plants	Plants	Just plants		Trees	Native plant species; Quercus calliprinos, Q. infectoria, Cedrus libani, Crataegus azarolus, C.monogyna, Sorbus flabelifollia, S. torminalis, Prunus ursina, Pinus pinea.		Native	Native	Aboveground	Positive	Survival rate of 95%; this was was an 'extraordinary' survival rate, give there was no irrigation. The species with the highest survival rate 'play an important ecological role, attracting seed-dispersal fauna, and have a significant economic value for local livelihoods – the collection of wild fruits and oak honey'.	Visual surveys
Adaptive forest landscape restoration as a contribution to more resilient ecosystems in the Shouf Biosphere Reserve (Lebanon)	INT-065-2	10.1a	Direct sowing of seeds. Connected the isolated cedar stands of Ain Zhalta and Barouk, through the establishment of an oak forest stand (Quercus brantii ssp. look Mouterde and Quercus cerris L.) in the denuded mountain slopes, and building on previous restoration projects. Restoration occurring within a protected area.	Restoration	Montane/Alpine	Other terrestrial	Lebanon	Upper middle income	West Asia	No conflict declared	Yes	Field experiment implemented by author(s)	X				Detailed			X					Sur r	Ecosystem functioning and population dynamics		Plants	Plants	Just plants		Trees	Native plant species; Quercus brantii ssp. look Quercus cerris var.pseudocerris Surface.		Native	Native	Aboveground	Unclear	Survival rate of 20%. Low survival rate due to rodent predation; but addition of plastic tubes as protection helped prevent predation and led to increased germination and growth; alternative rodent protection (small boxes) was unsuccessful.	Visual surveys
Adaptive forest landscape restoration as a contribution to more resilient ecosystems in the Shouf Biosphere Reserve (Lebanon)	INT-065-3	10.2a	Planting of seedlings. Restoration occurring within a protected area.	Restoration	Montane/Alpine	Other terrestrial	Lebanon	Upper middle income	West Asia	No conflict declared	Yes	Field experiment implemented by author(s)	X				Detailed			X					Sur r	Ecosystem functioning and population dynamics		Plants	Plants	Just plants		Trees	Native plant species; Quercus brantii look, Cedrus libani, Juniperus drupacea, Acer tauricolum, Crataegus azarolus, Sorbus flabellifolia, S. torminalis Prunus ursina, Prunus prostrata, P. syriaca, Cotoneaster nummularia, Malus trilobata, Berberis libanotica.		Native	Native	Aboveground	Positive	Survival rate of 79% (average), with three species having 100% survival rate.	Visual surveys
Adaptive forest landscape restoration as a contribution to more resilient ecosystems in the Shouf Biosphere Reserve (Lebanon)	INT-065-4	10.3a	Combined direct sowing and planting of seedlings. Restoration of natural vegetation cover in the instable talus slopes of an abandoned quarry. Restoration occurring within a protected area.	Restoration	Montane/Alpine	Other terrestrial	Lebanon	Upper middle income	West Asia	No conflict declared	Yes	Field experiment implemented by author(s)	X				Detailed			X					Sur r	Ecosystem functioning and population dynamics		Plants	Plants	Just plants		Trees	Native plant species; Cedrus libani, Pinus brutia, P. pinea, Quercus calliprinos, Celtis australis, Salix alba, Crataegus azarolus, Stirax officinalis, Rhus coriaria, Sorbus flabellifolia, S. torminalis, Cupressus sempervirens, Celtis australis, Cedrus libani, Pinus brutia, P. pinea.		Native	Native	Aboveground	Positive	Survival rate of 85-95%.	Visual surveys
Adaptive forest landscape restoration as a contribution to more resilient ecosystems in the Shouf Biosphere Reserve (Lebanon)	INT-065-5	10.4a	Planting of seedlings with irrigation, implementation of grazing control measures, and watering provided during the summer drought period. Created a green barrier between the road and the wetland. Restoration occurring within a protected area	Restoration	Streams, rivers, riparian	Coastal/marine/freshwater	Lebanon	Upper middle income	West Asia	No conflict declared	Yes	Field experiment implemented by author(s)	X				Detailed			X					Sur r	Ecosystem functioning and population dynamics		Plants	Plants	Just plants		Trees	Native plant species; Celtis australis, Populus bolleana, Ulmus minor, Fraxinus syriacus.		Native	Native	Aboveground	Positive	Survival rate of 99%.	Visual surveys
Diversity, functional structure and functional redundancy of woodland plant communities: How do mixed tree species plantations compare with monocultures?	INT-066-1	11a	Thetford forest, UK: management of intimate mixtures of Scots pine and pedunculate oak.	Management	Temperate forests	Forest	United Kingdom	High income	Europe	No conflict declared	Yes	Same funding body for research & int	X				Detailed	X							Sp ri	Diversity	Median species richness per 2x2m quadrat	Plants	Plants	Just plants		Trees & other plants	Vascular plant species		Mixed	At least some invasive/non-native	Aboveground	No effect	No signifcant difference in median species richness per 2x2m quadrat in the intervention stand (mixed) and the expected (controls: Scots pine (Pinus sylvestris) and pedunculate oak (Quercus robur) monocultures). (Thetford forest)	Visual surveys
Diversity, functional structure and functional redundancy of woodland plant communities: How do mixed tree species plantations compare with monocultures?	INT-066-1	11b	Thetford forest, UK: management of intimate mixtures of Scots pine and pedunculate oak.	Management	Temperate forests	Forest	United Kingdom	High income	Europe	No conflict declared	Yes	Same funding body for research & int	X				Detailed	X							Sp di	Diversity	Shannon diversity index (a.k.a. Shannon-Wiener diversity index)	Plants	Plants	Just plants		Trees & other plants	Vascular plant species		Mixed	At least some invasive/non-native	Aboveground	No effect	No significant difference in mean Shannon's diversity index of 2x2m quadrats between intervention (mixed stand) and controls (Scots pine (Pinus sylvestris) and pedunculate oak (Qouercus robur) monocultures). Shannon diversity index calculated as H' = -[sum of]pi ln(pi), where pi = Ci/ [sum of]Ci and Ci = mean pecetnage cover of species in the quadrat.	Visual surveys
Diversity, functional structure and functional redundancy of woodland plant communities: How do mixed tree species plantations compare with monocultures?	INT-066-1	11c	Thetford forest, UK: management of intimate mixtures of Scots pine and pedunculate oak.	Management	Temperate forests	Forest	United Kingdom	High income	Europe	No conflict declared	Yes	Same funding body for research & int	X				Detailed	X							Sp ev	Diversity	Pielou's Equitability index	Plants	Plants	Just plants		Trees & other plants	Vascular plant species		Mixed	At least some invasive/non-native	Aboveground	Negative	Significantly lower equitability index in the intervetnion stand (mixed species) than expected (control: Scots pine (Pinus sylvestris) and pedunculate oak (Quercus robur) monocultures). Pielou's equitability index J' = H'/log(2S), where H' = Shannon's diversity index, and S = spp richness.	Visual surveys
Diversity, functional structure and functional redundancy of woodland plant communities: How do mixed tree species plantations compare with monocultures?	INT-066-1	11d	Thetford forest, UK: management of intimate mixtures of Scots pine and pedunculate oak.	Management	Temperate forests	Forest	United Kingdom	High income	Europe	No conflict declared	Yes	Same funding body for research & int	X				Detailed	X							Fun di	Diversity	Response group richness	Plants	Plants	Just plants		Trees & other plants	Vascular plant species		Mixed	At least some invasive/non-native	Aboveground	No effect	No significant difference in response group richness between stand types. Plants pecies were clustered into nine response groups according to 19 functional response traits. Richness was per stand.	Visual surveys
Diversity, functional structure and functional redundancy of woodland plant communities: How do mixed tree species plantations compare with monocultures?	INT-066-1	11e	Thetford forest, UK: management of intimate mixtures of Scots pine and pedunculate oak.	Management	Temperate forests	Forest	United Kingdom	High income	Europe	No conflict declared	Yes	Same funding body for research & int	X				Detailed	X							Fun id	Ecosystem functioning and population dynamics	Relative abundance of response groups	Plants	Plants	Just plants		Trees & other plants	Vascular plant species		Mixed	At least some invasive/non-native	Aboveground	Mixed	Mixed stands had non-significant but higher species abundance than scots pine monocultures for three response groups (woody shrubs/climbers, spring-flowering, shade tolerant herbs, tall anemochorous perennials), but lower than oak monocultures.	Visual surveys
Diversity, functional structure and functional redundancy of woodland plant communities: How do mixed tree species plantations compare with monocultures?	INT-066-1	11f	Thetford forest, UK: management of intimate mixtures of Scots pine and pedunculate oak.	Management	Temperate forests	Forest	United Kingdom	High income	Europe	No conflict declared	Yes	Same funding body for research & int	X				Detailed	X							Fun di	Diversity	Functional redundancy within response groups	Plants	Plants	Just plants		Trees & other plants	Vascular plant species		Mixed	At least some invasive/non-native	Aboveground	Mixed	Functional redundancy was higher among tall anemochorous perennial species, in Scots pine monocultures compared to oak monocultures, and mixed stands were intermediate. There were no other significant differences in functional redundancy between stand types.	Visual surveys
Diversity, functional structure and functional redundancy of woodland plant communities: How do mixed tree species plantations compare with monocultures?	INT-066-1	11g	Thetford forest, UK: management of intimate mixtures of Scots pine and pedunculate oak.	Management	Temperate forests	Forest	United Kingdom	High income	Europe	No conflict declared	Yes	Same funding body for research & int	X				Detailed	X							Fun di	Diversity	Effect group richness	Plants	Plants	Just plants		Trees & other plants	Vascular plant species		Mixed	At least some invasive/non-native	Aboveground	No effect	No significant difference in effect group richness between stand types. Species were clustered into seven effect trait groups, using nince functional effects traits.	Visual surveys
Diversity, functional structure and functional redundancy of woodland plant communities: How do mixed tree species plantations compare with monocultures?	INT-066-1	11h	Thetford forest, UK: management of intimate mixtures of Scots pine and pedunculate oak.	Management	Temperate forests	Forest	United Kingdom	High income	Europe	No conflict declared	Yes	Same funding body for research & int	X				Detailed	X							Fun id	Ecosystem functioning and population dynamics	Relative abundance of effect groups	Plants	Plants	Just plants		Trees & other plants	Vascular plant species		Mixed	At least some invasive/non-native	Aboveground	No effect	Scots pine monocultures had higher abundance of ferns & rushes, and lower abundance of shrubs/climbers than oak monocultures; but mixed stands did not significantly differ from either. There were no other significant differences.	Visual surveys
Diversity, functional structure and functional redundancy of woodland plant communities: How do mixed tree species plantations compare with monocultures?	INT-066-1	11i	Thetford forest, UK: management of intimate mixtures of Scots pine and pedunculate oak.	Management	Temperate forests	Forest	United Kingdom	High income	Europe	No conflict declared	Yes	Same funding body for research & int	X				Detailed	X							Fun di	Diversity	Functional redundancy within effect groups	Plants	Plants	Just plants		Trees & other plants	Vascular plant species		Mixed	At least some invasive/non-native	Aboveground	Mixed	Functional redundancy among ferns and rushes was higher in Scos pine than oak, and intermediate (non-significantly different) in mixed stands. Other functional groups did not differ in redundancy.	Visual surveys
Diversity, functional structure and functional redundancy of woodland plant communities: How do mixed tree species plantations compare with monocultures?	INT-066-2	11.1a	New Forest, UK: management of intimate mixtures of Scots pine and pedunculate oak.	Management	Temperate forests	Forest	United Kingdom	High income	Europe	No conflict declared	Yes	Same funding body for research & int	X				Detailed	X							Sp ri	Diversity	Median species richness per 2x2m quadrat	Plants	Plants	Just plants		Trees & other plants	Vascular plant species		Mixed	At least some invasive/non-native	Aboveground	Positive	Significantly higher median species richness per 2x2m quadrat in the intervention stand (mixed species) than expected (extrapolating from performance in controls: Scots pine (Pinus sylvestris) and pedunculate oak (Quercus robur) monocultures). (New Forest)	Visual surveys
Diversity, functional structure and functional redundancy of woodland plant communities: How do mixed tree species plantations compare with monocultures?	INT-066-2	11.1b	New Forest, UK: management of intimate mixtures of Scots pine and pedunculate oak.	Management	Temperate forests	Forest	United Kingdom	High income	Europe	No conflict declared	Yes	Same funding body for research & int	X				Detailed	X							Sp di	Diversity	Shannon diversity index (a.k.a. Shannon-Wiener diversity index)	Plants	Plants	Just plants		Trees & other plants	Vascular plant species		Mixed	At least some invasive/non-native	Aboveground	Positive	Significantly higher mean Shannon's diversity index of 2x2m quadrats in the intervention stand (mixed species) than expected (controls: Scots pine (Pinus sylvestris) and pedunculate oak (Qouercus robur) monocultures). Shannon diversity index calculated as H' = -[sum of]pi ln(pi), where pi = Ci/ [sum of]Ci and Ci = mean pecetnage cover of species in the quadrat.	Visual surveys
Diversity, functional structure and functional redundancy of woodland plant communities: How do mixed tree species plantations compare with monocultures?	INT-066-2	11.1c	New Forest, UK: management of intimate mixtures of Scots pine and pedunculate oak.	Management	Temperate forests	Forest	United Kingdom	High income	Europe	No conflict declared	Yes	Same funding body for research & int	X				Detailed	X							Sp ev	Diversity	Pielou's Equitability index	Plants	Plants	Just plants		Trees & other plants	Vascular plant species		Mixed	At least some invasive/non-native	Aboveground	Positive	Significantly higher equitability index in the intervetnion stand (mixed species) than expected (control: Scots pine (Pinus sylvestris) and pedunculate oak (Quercus robur) monocultures). Pielou's equitability index J' = H'/log(2S), where H' = Shannon's diversity index, and S = spp richness.	Visual surveys
Diversity, functional structure and functional redundancy of woodland plant communities: How do mixed tree species plantations compare with monocultures?	INT-066-2	11.1d	New Forest, UK: management of intimate mixtures of Scots pine and pedunculate oak.	Management	Temperate forests	Forest	United Kingdom	High income	Europe	No conflict declared	Yes	Same funding body for research & int	X				Detailed	X							Fun di	Diversity	Response group richness	Plants	Plants	Just plants		Trees & other plants	Vascular plant species		Mixed	At least some invasive/non-native	Aboveground	No effect	No significant difference in response group richness between stand types. Plants pecies were clustered into nine response groups according to 19 functional response traits. Richness was per stand.	Visual surveys
Diversity, functional structure and functional redundancy of woodland plant communities: How do mixed tree species plantations compare with monocultures?	INT-066-2	11.1e	New Forest, UK: management of intimate mixtures of Scots pine and pedunculate oak.	Management	Temperate forests	Forest	United Kingdom	High income	Europe	No conflict declared	Yes	Same funding body for research & int	X				Detailed	X							Fun id	Ecosystem functioning and population dynamics	Relative abundance of response groups	Plants	Plants	Just plants		Trees & other plants	Vascular plant species		Mixed	At least some invasive/non-native	Aboveground	Mixed	Mixed stands had non-significant but higher species abundance than scots pine monocultures for three response groups (woody shrubs/climbers, spring-flowering, shade tolerant herbs, tall anemochorous perennials), but lower than oak monocultures.	Visual surveys
Diversity, functional structure and functional redundancy of woodland plant communities: How do mixed tree species plantations compare with monocultures?	INT-066-2	11.1f	New Forest, UK: management of intimate mixtures of Scots pine and pedunculate oak.	Management	Temperate forests	Forest	United Kingdom	High income	Europe	No conflict declared	Yes	Same funding body for research & int	X				Detailed	X							Fun di	Diversity	Functional redundancy	Plants	Plants	Just plants		Trees & other plants	Vascular plant species		Mixed	At least some invasive/non-native	Aboveground	Mixed	Functional redundancy was higher among tall anemochorous perennial species, in Scots pine monocultures compared to oak monocultures, and mixed stands were intermediate. There were no other significant differences in functional redundancy between stand types.	Visual surveys
Diversity, functional structure and functional redundancy of woodland plant communities: How do mixed tree species plantations compare with monocultures?	INT-066-2	11.1g	New Forest, UK: management of intimate mixtures of Scots pine and pedunculate oak.	Management	Temperate forests	Forest	United Kingdom	High income	Europe	No conflict declared	Yes	Same funding body for research & int	X				Detailed	X							Fun di	Diversity	Effect group richness	Plants	Plants	Just plants		Trees & other plants	Vascular plant species		Mixed	At least some invasive/non-native	Aboveground	No effect	No significant difference in effect group richness between stand types. Species were clustered into seven effect trait groups, using nince functional effects traits.	Visual surveys
Diversity, functional structure and functional redundancy of woodland plant communities: How do mixed tree species plantations compare with monocultures?	INT-066-2	11.1h	New Forest, UK: management of intimate mixtures of Scots pine and pedunculate oak.	Management	Temperate forests	Forest	United Kingdom	High income	Europe	No conflict declared	Yes	Same funding body for research & int	X				Detailed	X							Fun id	Ecosystem functioning and population dynamics	Relative abundance of effect groups	Plants	Plants	Just plants		Trees & other plants	Vascular plant species		Mixed	At least some invasive/non-native	Aboveground	No effect	Scots pine monocultures had higher abundance of ferns & rushes, and lower abundance of shrubs/climbers than oak monocultures; but mixed stands did not significantly differ from either. There were no other significant differences.	Visual surveys
Diversity, functional structure and functional redundancy of woodland plant communities: How do mixed tree species plantations compare with monocultures?	INT-066-2	11.1i	New Forest, UK: management of intimate mixtures of Scots pine and pedunculate oak.	Management	Temperate forests	Forest	United Kingdom	High income	Europe	No conflict declared	Yes	Same funding body for research & int	X				Detailed	X							Fun di	Diversity	Functional redundancy within effect groups	Plants	Plants	Just plants		Trees & other plants	Vascular plant species		Mixed	At least some invasive/non-native	Aboveground	No effect	Functional redundancy within effects groups did not differ between the mixed and control stands.	Visual surveys
Diversity, functional structure and functional redundancy of woodland plant communities: How do mixed tree species plantations compare with monocultures?	INT-066-3	11.2a	Republic of Ireland: management of intimate mixtures of Scots pine and pedunculate oak.	Management	Temperate forests	Forest	United Kingdom	High income	Europe	No conflict declared	No		X				Detailed	X							Sp ri	Diversity	Median species richness per 2x2m quadrat	Plants	Plants	Just plants		Trees & other plants	Vascular plant species		Mixed	At least some invasive/non-native	Aboveground	Negative	Significantly lower median observed species richness per 2x2m quadrat in the intervention (mixed stand) than that expected from performance in controls (Scots pine (Pinus sylvestris) and pedunculate oak (Quercus robur) monocultures). (Ireland)	Visual surveys
Diversity, functional structure and functional redundancy of woodland plant communities: How do mixed tree species plantations compare with monocultures?	INT-066-3	11.2b	Republic of Ireland: management of intimate mixtures of Scots pine and pedunculate oak.	Management	Temperate forests	Forest	United Kingdom	High income	Europe	No conflict declared	No		X				Detailed	X							Sp di	Diversity	Shannon diversity index (a.k.a. Shannon-Wiener diversity index)	Plants	Plants	Just plants		Trees & other plants	Vascular plant species		Mixed	At least some invasive/non-native	Aboveground	No effect	No significant difference in mean Shannon's diversity index of 2x2m quadrats between intervention (mixed stand) and controls (Scots pine (Pinus sylvestris) and pedunculate oak (Qouercus robur) monocultures). Shannon diversity index calculated as H' = -[sum of]pi ln(pi), where pi = Ci/ [sum of]Ci and Ci = mean pecetnage cover of species in the quadrat.	Visual surveys
Diversity, functional structure and functional redundancy of woodland plant communities: How do mixed tree species plantations compare with monocultures?	INT-066-3	11.2c	Republic of Ireland: management of intimate mixtures of Scots pine and pedunculate oak.	Management	Temperate forests	Forest	United Kingdom	High income	Europe	No conflict declared	No		X				Detailed	X							Sp ev	Diversity	Pielou's Equitability index	Plants	Plants	Just plants		Trees & other plants	Vascular plant species		Mixed	At least some invasive/non-native	Aboveground	Negative	Significantly lower species richness per 2x2m quadrat in the intervention stand (mixed) than expected (controls: Scots pine (Pinus sylvestris) and pedunculate oak (Quercus robur) monocultures).	Visual surveys
Diversity, functional structure and functional redundancy of woodland plant communities: How do mixed tree species plantations compare with monocultures?	INT-066-3	11.2d	Republic of Ireland: management of intimate mixtures of Scots pine and pedunculate oak.	Management	Temperate forests	Forest	United Kingdom	High income	Europe	No conflict declared	No		X				Detailed	X							Fun di	Diversity	Response group richness	Plants	Plants	Just plants		Trees & other plants	Vascular plant species		Mixed	At least some invasive/non-native	Aboveground	No effect	No significant difference in response group richness between stand types. Plants pecies were clustered into nine response groups according to 19 functional response traits. Richness was per stand.	Visual surveys
Diversity, functional structure and functional redundancy of woodland plant communities: How do mixed tree species plantations compare with monocultures?	INT-066-3	11.2e	Republic of Ireland: management of intimate mixtures of Scots pine and pedunculate oak.	Management	Temperate forests	Forest	United Kingdom	High income	Europe	No conflict declared	No		X				Detailed	X							Fun id	Ecosystem functioning and population dynamics	Relative abundance of response groups	Plants	Plants	Just plants		Trees & other plants	Vascular plant species		Mixed	At least some invasive/non-native	Aboveground	Mixed	Mixed stands had non-significant but higher species abundance than scots pine monocultures for three response groups (woody shrubs/climbers, spring-flowering, shade tolerant herbs, tall anemochorous perennials), but lower than oak monocultures.	Visual surveys
Diversity, functional structure and functional redundancy of woodland plant communities: How do mixed tree species plantations compare with monocultures?	INT-066-3	11.2f	Republic of Ireland: management of intimate mixtures of Scots pine and pedunculate oak.	Management	Temperate forests	Forest	United Kingdom	High income	Europe	No conflict declared	No		X				Detailed	X							Fun di	Diversity	Functional redundancy	Plants	Plants	Just plants		Trees & other plants	Vascular plant species		Mixed	At least some invasive/non-native	Aboveground	Mixed	Functional redundancy was higher among tall anemochorous perennial species, in Scots pine monocultures compared to oak monocultures, and mixed stands were intermediate. There were no other significant differences in functional redundancy between stand types.	Visual surveys
Diversity, functional structure and functional redundancy of woodland plant communities: How do mixed tree species plantations compare with monocultures?	INT-066-3	11.2g	Republic of Ireland: management of intimate mixtures of Scots pine and pedunculate oak.	Management	Temperate forests	Forest	United Kingdom	High income	Europe	No conflict declared	No		X				Detailed	X							Fun di	Diversity	Effect group richness	Plants	Plants	Just plants		Trees & other plants	Vascular plant species		Mixed	At least some invasive/non-native	Aboveground	No effect	No significant difference in effect group richness between stand types. Species were clustered into seven effect trait groups, using nince functional effects traits.	Visual surveys
Diversity, functional structure and functional redundancy of woodland plant communities: How do mixed tree species plantations compare with monocultures?	INT-066-3	11.2h	Republic of Ireland: management of intimate mixtures of Scots pine and pedunculate oak.	Management	Temperate forests	Forest	United Kingdom	High income	Europe	No conflict declared	No		X				Detailed	X							Fun id	Ecosystem functioning and population dynamics	Relative abundance of effect groups	Plants	Plants	Just plants		Trees & other plants	Vascular plant species		Mixed	At least some invasive/non-native	Aboveground	No effect	Scots pine monocultures had higher abundance of ferns & rushes, and lower abundance of shrubs/climbers than oak monocultures; but mixed stands did not significantly differ from either. There were no other significant differences.	Visual surveys
Diversity, functional structure and functional redundancy of woodland plant communities: How do mixed tree species plantations compare with monocultures?	INT-066-3	11.2i	Republic of Ireland: management of intimate mixtures of Scots pine and pedunculate oak.	Management	Temperate forests	Forest	United Kingdom	High income	Europe	No conflict declared	No		X				Detailed	X							Fun di	Diversity	Functional redundancy within effect groups	Plants	Plants	Just plants		Trees & other plants	Vascular plant species		Mixed	At least some invasive/non-native	Aboveground	Mixed	Functional redundancy among ferns and rushes was higher in Scos pine than oak, and intermediate (non-significantly different) in mixed stands. Other functional groups did not differ in redundancy.	Visual surveys
Arid old-field restoration: Native perennial grasses suppress weeds and erosion, but also suppress native shrubs	INT-067-1	12a	Restoration of degraded farmland by seeding of native grass species, either with or without irrigation. aiming to aid establishment of shrubs by reducing erosion and weed abundance. There were two restoration sites: one site was used for alfalfa production until the start of the experiment, the other was denuded pasture formerly used for burro and llama grazing. Experiment: seeded five native gra…	Restoration	Deserts and xeric shrublands	Other terrestrial	United States of America	High income	North America	No conflict declared	Yes	Field experiment implemented by author(s)	X				Detailed	X					X		Veg dens	Biomass		Plants	Plants	Just plants		Grasses & other plants	Weeds (non-native plants, that were primarily annual forbs)		Mixed	At least some invasive/non-native	Aboveground	Positive	Weed density did not statistically significantly vary with presence/absence of irrigation, or which species were planted. However, there were trends suggesting that some planted species were better at excluding weeds than others. The authors conclude that 'irrigation and seeding of grasses provided substantial short-term reductions in weed invasion'.	Visual surveys
Arid old-field restoration: Native perennial grasses suppress weeds and erosion, but also suppress native shrubs	INT-067-1	12b	Restoration of degraded farmland by seeding of native grass species, either with or without irrigation. aiming to aid establishment of shrubs by reducing erosion and weed abundance. There were two restoration sites: one site was used for alfalfa production until the start of the experiment, the other was denuded pasture formerly used for burro and llama grazing. Experiment: seeded five native gra…	Restoration	Deserts and xeric shrublands	Other terrestrial	United States of America	High income	North America	No conflict declared	Yes	Field experiment implemented by author(s)	X				Detailed	X					X		Biom	Biomass		Plants	Plants	Just plants		Grasses & other plants	Weeds (non-native plants, that were primarily annual forbs)		Mixed	At least some invasive/non-native	Aboveground	Positive	Weed biomass did not statistically significantly vary with presence/absence of irrigation, or which species were planted. However, there were trends suggesting that some planted species were better at excluding weeds than others. The authors conclude that 'irrigation and seeding of grasses provided substantial short-term reductions in weed invasion'.	Visual surveys
Arid old-field restoration: Native perennial grasses suppress weeds and erosion, but also suppress native shrubs	INT-067-1	12c	Restoration of degraded farmland by seeding of native grass species, either with or without irrigation. aiming to aid establishment of shrubs by reducing erosion and weed abundance. There were two restoration sites: one site was used for alfalfa production until the start of the experiment, the other was denuded pasture formerly used for burro and llama grazing. Experiment: seeded five native gra…	Restoration	Deserts and xeric shrublands	Other terrestrial	United States of America	High income	North America	No conflict declared	Yes	Field experiment implemented by author(s)	X				Detailed	X					X		Veg dens	Biomass		Plants	Plants	Just plants		Grasses	Cool season grass species, planted		Native	At least some invasive/non-native	Aboveground	Positive	Grass species density was significatnly higher in irrigated plots (two years after planting), with one grass species having more than twice the density of the other species. Although after two years of irrigation ceasing the density declined to 48% of year 2 levels , the grass density remained at least 2 times higher than in non-irrigated plots (for all four perennial cool-season grass species), …	Visual surveys
Arid old-field restoration: Native perennial grasses suppress weeds and erosion, but also suppress native shrubs	INT-067-1	12d	Restoration of degraded farmland by seeding of native grass species, either with or without irrigation. aiming to aid establishment of shrubs by reducing erosion and weed abundance. There were two restoration sites: one site was used for alfalfa production until the start of the experiment, the other was denuded pasture formerly used for burro and llama grazing. Experiment: seeded five native gra…	Restoration	Deserts and xeric shrublands	Other terrestrial	United States of America	High income	North America	No conflict declared	Yes	Field experiment implemented by author(s)	X				Detailed	X					X		Biom	Biomass		Plants	Plants	Just plants		Grasses	Cool season grass species, planted		Native	At least some invasive/non-native	Aboveground	Positive	Grass species biomass was significantly higher (200x) in irrigated than non-irrigated plots, two years after planting. Although after 2 years without irrigation, plant biomass decliend to 38% of year 2 levels, it remained at least 3 times higher than in non-irrigated plots (for all four perennial cool-season grass species). Grass biomass was higher than the control. Grass biomass remained zero in…	Visual surveys
Arid old-field restoration: Native perennial grasses suppress weeds and erosion, but also suppress native shrubs	INT-067-1	12e	Restoration of degraded farmland by seeding of native grass species, either with or without irrigation. aiming to aid establishment of shrubs by reducing erosion and weed abundance. There were two restoration sites: one site was used for alfalfa production until the start of the experiment, the other was denuded pasture formerly used for burro and llama grazing. Experiment: seeded five native gra…	Restoration	Deserts and xeric shrublands	Other terrestrial	United States of America	High income	North America	No conflict declared	Yes	Field experiment implemented by author(s)	X				Detailed	X					X		Veg dens	Biomass		Plants	Plants	Just plants		Grasses	Perennial glasses, both planted and non-planted		Unclear	At least some invasive/non-native	Aboveground	Positive	Perennial grass cover (of planted and volunteer species) was 6.7 times higher in irrigated than non-irrigated plots, four years after planting (including two years with no irrigation). Grass cover was higher than in the control.	Visual surveys
Arid old-field restoration: Native perennial grasses suppress weeds and erosion, but also suppress native shrubs	INT-067-1	12f	Restoration of degraded farmland by seeding of native grass species, either with or without irrigation. aiming to aid establishment of shrubs by reducing erosion and weed abundance. There were two restoration sites: one site was used for alfalfa production until the start of the experiment, the other was denuded pasture formerly used for burro and llama grazing. Experiment: seeded five native gra…	Restoration	Deserts and xeric shrublands	Other terrestrial	United States of America	High income	North America	No conflict declared	Yes	Field experiment implemented by author(s)	X				Detailed	X					X		Veg dens	Biomass		Plants	Plants	Just plants		Grasses & other plants	Annual plants, mostly forbs		Mixed	At least some invasive/non-native	Aboveground	Positive	Percent cover of annual plants was 37% higher in non-irrigated than irrigated plots, by four years after planting. However, bare ground was 76% more abundant in non-irrigated plots. Percent cover was higher than in the control.	Visual surveys
Arid old-field restoration: Native perennial grasses suppress weeds and erosion, but also suppress native shrubs	INT-067-1	12g	Restoration of degraded farmland by seeding of native grass species, either with or without irrigation. aiming to aid establishment of shrubs by reducing erosion and weed abundance. There were two restoration sites: one site was used for alfalfa production until the start of the experiment, the other was denuded pasture formerly used for burro and llama grazing. Experiment: seeded five native gra…	Restoration	Deserts and xeric shrublands	Other terrestrial	United States of America	High income	North America	No conflict declared	Yes	Field experiment implemented by author(s)	X				Detailed	X					X		Sur r	Ecosystem functioning and population dynamics		Plants	Plants	Just plants		Other plants	Transplanted shrubs		Unclear	At least some invasive/non-native	Aboveground	Mixed	After two years, 25% of transplanted shrubs were still alive; after four years, just 10% were still alive. However, shrub survival was twice as high in plots with D. spicata planted grasses (warm-season grasses). Seeded cool-season grasses did not facilitate shrub establishment. The authors suggest that this was because any faclitation from seeded grasses (e.g. reduced weed presure and reduced er…	Visual surveys
Arid old-field restoration: Native perennial grasses suppress weeds and erosion, but also suppress native shrubs	INT-067-1	12h	Restoration of degraded farmland by seeding of native grass species, either with or without irrigation. aiming to aid establishment of shrubs by reducing erosion and weed abundance. There were two restoration sites: one site was used for alfalfa production until the start of the experiment, the other was denuded pasture formerly used for burro and llama grazing. Experiment: seeded five native gra…	Restoration	Deserts and xeric shrublands	Other terrestrial	United States of America	High income	North America	No conflict declared	Yes	Field experiment implemented by author(s)	X				Detailed	X					X		Veg dens	Biomass		Plants	Plants	Just plants		Other plants	Shrubs - both planted and self-established (volunteer)		Unclear	At least some invasive/non-native	Aboveground	Mixed	After four years, shrub cover was 13 times higher in plots with D. spicata planted grass (warm-season grasses), and grass cover and planted grass species were found to be significant drivers of shrub cover, rather than irrigation (although shrub cover was higher in irrigated plots). After five years, 98% of all shrubs were volunteers, not transplanted individuals. The authors suggest that drillin…	Visual surveys
Grazing exclosure and plantation: A synchronic study of two restoration techniques improving plant community and soil properties in arid degraded steppes (Algeria)	INT-068-1	13a	Arid grassland restoration through a) livestock exclosures and b) planting of shrubs, with livestock excluded for the first 4 years. Planting was done in the most degraded areas. a) Livestock exclosures: used boundary stones, with agreement of nomad shephards to kee livestock out (rather than physical fencing). b) Planting: 220ha plantation; primarily Altriplex canescens, an evergreen shrub nativ…	Combination	Montane/Alpine	Other terrestrial	Algeria	Upper middle income	Africa	No conflict declared	Yes	Field experiment implemented by author(s)	X				Detailed	X					X		Sp ri	Diversity		Plants	Plants	Just plants		Grasses & other plants	Arid grassland species. Planting was primarily of of Atriplex canscens (an evergreen shrub, native to North America), chosen for its dorought and cold winter resistance to Algerian steppe.		Mixed	At least some invasive/non-native	Aboveground	Positive	Species richness was around twice as high in restored areas than their controls, and grazing exclosures had higher richness than planted areas (23.28 species in exclosures, 11 in exclosure controls, 15.94 species in planted areas, 8.63 in planted area controls). Surveys took place four years after restoration.	Visual surveys
Grazing exclosure and plantation: A synchronic study of two restoration techniques improving plant community and soil properties in arid degraded steppes (Algeria)	INT-068-1	13b	Arid grassland restoration through either livestock exclosures with or without planting of shrubs (according to the prior state of the plot of land - planting was done in the most degraded areas). Livestock exclosures: used boundary stones, with agreement of nomad shephards. 326,500ha were planted, primarily with Altriplex canescens, an evergreen shrub native to North America, which acts as good …	Combination	Montane/Alpine	Other terrestrial	Algeria	Upper middle income	Africa	No conflict declared	Yes	Field experiment implemented by author(s)	X				Detailed	X					X		Fun id	Ecosystem functioning and population dynamics		Plants	Plants	Just plants		Grasses & other plants	Therophytic (annual plants that complete their life cycle in a short period when conditions are favourable and survive harsh conditions as seeds) and non-therophytic species		Unclear	At least some invasive/non-native	Aboveground	Positive	Both exclosures and plantations had higher therophyte and non-therophyte species richness than controls. Surveys took place four years after restoration.	Visual surveys
Grazing exclosure and plantation: A synchronic study of two restoration techniques improving plant community and soil properties in arid degraded steppes (Algeria)	INT-068-1	13c	Arid grassland restoration through either livestock exclosures with or without planting of shrubs (according to the prior state of the plot of land - planting was done in the most degraded areas). Livestock exclosures: used boundary stones, with agreement of nomad shephards. 326,500ha were planted, primarily with Altriplex canescens, an evergreen shrub native to North America, which acts as good …	Combination	Montane/Alpine	Other terrestrial	Algeria	Upper middle income	Africa	No conflict declared	Yes	Field experiment implemented by author(s)	X				Detailed	X					X		Sp di	Diversity	Shannon diversity index (a.k.a. Shannon-Wiener diversity index)	Plants	Plants	Just plants		Grasses & other plants	Arid grassland species, including shrubs		Unclear	At least some invasive/non-native	Aboveground	Positive	Shannon diversity index was higher in restored plots than controls, and higher in exclosures than plantations (1.56 in exclosures, 0.99 in exclosure control, 1.3 in plantations, 0.69 in plantation control). The different in index between plantations and exclosures may be more down to pre-existing ecological/environmental differences, rather than differen efficacies of the intervention sthemselves…	Visual surveys
Grazing exclosure and plantation: A synchronic study of two restoration techniques improving plant community and soil properties in arid degraded steppes (Algeria)	INT-068-1	13d	Arid grassland restoration through either livestock exclosures with or without planting of shrubs (according to the prior state of the plot of land - planting was done in the most degraded areas). Livestock exclosures: used boundary stones, with agreement of nomad shephards. 326,500ha were planted, primarily with Altriplex canescens, an evergreen shrub native to North America, which acts as good …	Combination	Montane/Alpine	Other terrestrial	Algeria	Upper middle income	Africa	No conflict declared	Yes	Field experiment implemented by author(s)	X				Detailed	X					X		Sp ev	Diversity	Pielou's Equitability index	Plants	Plants	Just plants		Grasses & other plants	Arid grassland species, including shrubs		Unclear	At least some invasive/non-native	Aboveground	Positive	Evenness index was low for both the restored and control areas (average of 0.32 for exclosures, plantations and exclosure control), but significantly lower in the plantation control (0.22). Surveys took place four years after restoration.	Visual surveys
Grazing exclosure and plantation: A synchronic study of two restoration techniques improving plant community and soil properties in arid degraded steppes (Algeria)	INT-068-1	13e	Arid grassland restoration through either livestock exclosures with or without planting of shrubs (according to the prior state of the plot of land - planting was done in the most degraded areas). Livestock exclosures: used boundary stones, with agreement of nomad shephards. 326,500ha were planted, primarily with Altriplex canescens, an evergreen shrub native to North America, which acts as good …	Combination	Montane/Alpine	Other terrestrial	Algeria	Upper middle income	Africa	No conflict declared	Yes	Field experiment implemented by author(s)	X				Detailed	X					X		Veg dens	Biomass		Plants	Plants	Just plants		Grasses & other plants	Arid grassland species, including shrubs		Unclear	At least some invasive/non-native	Aboveground	Positive	Plant cover in exclosures and plantations was around three times higher than in controls, a significant difference. Surveys took place four years after restoration.	Visual surveys
Grazing exclosure and plantation: A synchronic study of two restoration techniques improving plant community and soil properties in arid degraded steppes (Algeria)	INT-068-1	13f	Arid grassland restoration through either livestock exclosures with or without planting of shrubs (according to the prior state of the plot of land - planting was done in the most degraded areas). Livestock exclosures: used boundary stones, with agreement of nomad shephards. 326,500ha were planted, primarily with Altriplex canescens, an evergreen shrub native to North America, which acts as good …	Combination	Montane/Alpine	Other terrestrial	Algeria	Upper middle income	Africa	No conflict declared	Yes	Field experiment implemented by author(s)	X				Detailed	X					X		Lit	Biomass		NA	Microorganisms, fungi & other	Just plants			litter cover, bare ground, bare silty crust, coarse elements, sand	X	NA	At least some invasive/non-native	Aboveground	Positive	For exclosures without planting: litter cover was over 2x greater than outside exlosures, bare silty crust was over 3x higher, sand cover was about half that outside of exclosures, bare ground was about 10x lower, course elemnts were about 20% lower. There was a significant effect of management on all of these ground cover types except coarse elements. For exlosures with planting: litter cover wa…	Visual surveys
Exploiting indigenous knowledge commonwealth to mitigate disasters: from the archives of vulnerable communities in Zimbabwe	INT-070-1	14a	Use of taboos (prohibitions of actions that were believed sacred or curse related) which were enforced by fear of the unknown, but were crafted to preserve the status quo. E.g. taboo on felling of wild fruit trees, so that fruit is available during times of stress e.g. when crops fail E.g. taboo on carrying medicinal herbs out of the forest (they must be consumed by the plant), to prevent overhar…	Combination	Tropical and subtropical forests	Forest	Zimbabwe	Lower middle income	Africa	No conflict declared	No			X			Detailed			X					Veg ext	Biomass		Plants	Plants	Just plants		Trees	Forest trees		Unclear	Unclear/partially unclear	Aboveground	Positive	Deforestation reduced due to taboos on tree felling, such as t provide forage for bees. This was stated by local people in interviews - there was no quantitative measures, or formal control, only a stated change over time (or simply prevention of negative change).	Qualitative primary data
Unlocking ecosystem based adaptation opportunities in coastal Bangladesh	INT-071-1	15a	Planting of 6,100ha of new mangroves, and introduction of 10 important mangrove species to exisitng monoculture areas, and other actions, see below. This is Community Based Adaptation to Climate Change through Coastal Afforestation (CBACC-CF) project is the first Bangladesh National Adaptation Programme of Action (NAPA) project under Global Environment Facility (GEF)-UNDP portfolio, currently imp…	Mixed created/non-created habitats	Created forest, Mangroves	Terrestrial-aquatic/coastal combination	Bangladesh	Lower middle income	Asia + Pacific	No conflict declared	Yes	Author(s) associated with intervention		X			Absent					X			Veg ext	Biomass		Plants	Plants	Just plants		Trees	Mangrove forest trees		Unclear	Unclear/partially unclear	Aboveground	Positive	Forest coverage was 'enhanced' through planting.	Unclear
Assessing the Ecological Success of Restoration by Afforestation on the Chinese Loess Plateau	INT-076-1	16a	Natural revegetation without intensive human interference (such as farming and grazing). 18 plots had been naturally restored for over 20 years.	Restoration	Montane/Alpine	Other terrestrial	China	Upper middle income	Asia + Pacific	No conflict declared	Yes	Author(s) associated with intervention	X				Detailed				Space for time		X		Veg dens	Biomass	Percentage cover	Plants	Plants	Just plants		Trees & other plants	Not specified, but 'natural revegetation'.		Unclear	Unclear/partially unclear	Aboveground	Unclear	The percentage cover at naturally recovered herb sites was 1.6-1.7x lower than at afforested sites (stat sig). However, percentage cover at naturally recovered shrub sites did not differ significantly from afforested sites. Given that percentage cover was sig higher at afforested sites than pre-afforested sites, this suggests that the naturally recovered shrub sites had higher percentage cover th…	Visual surveys
Assessing the Ecological Success of Restoration by Afforestation on the Chinese Loess Plateau	INT-076-1	16b	Natural revegetation without intensive human interference (such as farming and grazing). 18 plots had been naturally restored for over 20 years.	Restoration	Montane/Alpine	Other terrestrial	China	Upper middle income	Asia + Pacific	No conflict declared	Yes	Author(s) associated with intervention	X				Detailed				Space for time		X		Sp ri	Diversity		Plants	Plants	Just plants		Trees & other plants	Not specified, but 'natural revegetation'.		Unclear	Unclear/partially unclear	Aboveground	Positive	Species richness of natural recovery sites was significantly higher than pre-afforested sites (crop slopes), for N facing but not S facing herb sites, and both N and S facing shrub sites. Species richness of natural recovery sites. However, the north facing herb sites had the highest species richness of all sites (19.33+/-4.8 (mean+/-SD)), and the north facing shrub site had a higher richness tha…	Visual surveys
Assessing the Ecological Success of Restoration by Afforestation on the Chinese Loess Plateau	INT-076-1	16c	Natural revegetation without intensive human interference (such as farming and grazing). 18 plots had been naturally restored for over 20 years.	Restoration	Montane/Alpine	Other terrestrial	China	Upper middle income	Asia + Pacific	No conflict declared	Yes	Author(s) associated with intervention	X				Detailed				Space for time		X		Sp di	Diversity	Margalef diversity index	Plants	Plants	Just plants		Trees & other plants	Not specified, but 'natural revegetation'.		Unclear	Unclear/partially unclear	Aboveground	Positive	Margalef diversity index was significantly higher in N facing shrub and herb, and S facing shrub, natural recovery plots, than in pre-afforested sites (crop slopes). It was non-significantly higher in S facing herb sites. It did not differ significantly between natural recovery sites and afforested sites.	Visual surveys
Assessing the Ecological Success of Restoration by Afforestation on the Chinese Loess Plateau	INT-076-1	16d	Natural revegetation without intensive human interference (such as farming and grazing). 18 plots had been naturally restored for over 20 years.	Restoration	Montane/Alpine	Other terrestrial	China	Upper middle income	Asia + Pacific	No conflict declared	Yes	Author(s) associated with intervention	X				Detailed				Space for time		X		Sp di	Diversity	Shannon diversity index (a.k.a. Shannon-Wiener diversity index)	Plants	Plants	Just plants		Trees & other plants	Not specified, but 'natural revegetation'.		Unclear	Unclear/partially unclear	Aboveground	Positive	Shannon diversity index (a.k.a. Shannon-Wiener diversity index) was significantly higher in the N facing herb and shrub natural recovery sites than the pre-afforested site (crop slope), but non-significantly higher in the S facing natural recovery sites. Shannon index was also significantly higher for both the herb and shrub N facing natural recoverysites than the S facing R. pseudoacacia plantat…	Visual surveys
Assessing the Ecological Success of Restoration by Afforestation on the Chinese Loess Plateau	INT-076-1	16e	Natural revegetation without intensive human interference (such as farming and grazing). 18 plots had been naturally restored for over 20 years.	Restoration	Montane/Alpine	Other terrestrial	China	Upper middle income	Asia + Pacific	No conflict declared	Yes	Author(s) associated with intervention	X				Detailed				Space for time		X		Sp ev	Diversity	Pielou's Equitability index	Plants	Plants	Just plants		Trees & other plants	Not specified, but 'natural revegetation'.		Unclear	Unclear/partially unclear	Aboveground	No effect	Pielou's index (evenness) for natural recovery sites did not significantly differ from the pre-afforested sites (slope croplands), the C. korshinskii plantations, or the R. pseudoacacia plantations except in one case; the peilou's index was significantly higher in the N facing herb natural recovery sites, than in the S facing R. pseudoacacia plantations.	Visual surveys
Assessing the Ecological Success of Restoration by Afforestation on the Chinese Loess Plateau	INT-076-1	16f	Natural revegetation without intensive human interference (such as farming and grazing). 18 plots had been naturally restored for over 20 years.	Restoration	Montane/Alpine	Other terrestrial	China	Upper middle income	Asia + Pacific	No conflict declared	Yes	Author(s) associated with intervention	X				Detailed				Space for time		X		Sp ev	Diversity	Sorensen's similarity index	Plants	Plants	Just plants		Trees & other plants	Not specified, but 'natural revegetation'.		Unclear	Unclear/partially unclear	Aboveground	Unclear	Sorensen's similarity index showed that species composition was very different in the natural recovery plots compared to the pre-afforestation (slope cropland) sites, ranging from 0.00 similarity index (shrub S facing sites) to 0.14 (herb N facing sites). There was greater similarity (although still low similarity) in species between natural recovery and afforested sites (ranged from 0.26 to 0.62…	Visual surveys
Assessing the Ecological Success of Restoration by Afforestation on the Chinese Loess Plateau	INT-076-2	16.1a	Afforestation with Caragana korshinskii (shrub species); in the Zhifanggou watershed, which is the state-level model watershed of the "Grain for Green" project.	Created habitats	Created other	Other terrestrial	China	Upper middle income	Asia + Pacific	No conflict declared	Yes	Author(s) associated with intervention & funding	X				Detailed				Space for time		X		Veg dens	Biomass	Percentage cover	Plants	Plants	Just plants		Other plants	Shrubs, primarily C korshinkii, and herbaceous species.		Mixed	At least some invasive/non-native	Aboveground	Positive	Percentage cover was 35%+/-17.5; herbaceous layer cover was 31.7%+/-10.8. Average percentage cover of forested sites (of all types) was 1.8-2 times pre-forested sites (stat sig), and 1.6-1.7 times tat of natural recovery site (stat sig).	Visual surveys
Assessing the Ecological Success of Restoration by Afforestation on the Chinese Loess Plateau	INT-076-2	16.1b	Afforestation with Caragana korshinskii (shrub species); in the Zhifanggou watershed, which is the state-level model watershed of the "Grain for Green" project.	Created habitats	Created other	Other terrestrial	China	Upper middle income	Asia + Pacific	No conflict declared	Yes	Author(s) associated with intervention & funding	X				Detailed					X	X		Stem dens	Biomass		Plants	Plants	Just plants		Other plants	Shrubs, primarily C korshinkii, and herbaceous species.		Mixed	At least some invasive/non-native	Aboveground	Positive	5866.7+/-2243.8 individuals/ha for C. korshinskii.	Visual surveys
Assessing the Ecological Success of Restoration by Afforestation on the Chinese Loess Plateau	INT-076-2	16.1c	Afforestation with Caragana korshinskii (shrub species); in the Zhifanggou watershed, which is the state-level model watershed of the "Grain for Green" project.	Created habitats	Created other	Other terrestrial	China	Upper middle income	Asia + Pacific	No conflict declared	Yes	Author(s) associated with intervention & funding	X				Detailed					X	X		Cano	Biomass	Canopy structure	Plants	Plants	Just plants		Other plants	Shrubs, primarily C korshinkii, and herbaceous species.		Mixed	At least some invasive/non-native	Aboveground	Unclear	More vertical canopy structure than reference (natural recovery) sites.	Visual surveys
Assessing the Ecological Success of Restoration by Afforestation on the Chinese Loess Plateau	INT-076-2	16.1d	Afforestation with Caragana korshinskii (shrub species); in the Zhifanggou watershed, which is the state-level model watershed of the "Grain for Green" project.	Created habitats	Created other	Other terrestrial	China	Upper middle income	Asia + Pacific	No conflict declared	Yes	Author(s) associated with intervention & funding	X				Detailed					X	X		Age str	Ecosystem functioning and population dynamics	Vegetation height	Plants	Plants	Just plants		Other plants	Shrubs, primarily C korshinkii, and herbaceous species.		Mixed	At least some invasive/non-native	Aboveground	Unclear	Canopy height of C. korshinskii afforested layers was 1.3m+/-0.1 (lower than R. pseudoacacia sites, which is expected given the latter is a tree rather than a shrub species; it was not compared with pre-afforestation or natural recovery sites). The herbaceous layer was 0.45m+/-0.17.	Visual surveys
Assessing the Ecological Success of Restoration by Afforestation on the Chinese Loess Plateau	INT-076-2	16.1e	Afforestation with Caragana korshinskii (shrub species); in the Zhifanggou watershed, which is the state-level model watershed of the "Grain for Green" project.	Created habitats	Created other	Other terrestrial	China	Upper middle income	Asia + Pacific	No conflict declared	Yes	Author(s) associated with intervention & funding	X				Detailed					X	X		Cano	Biomass	Canopy cover	Plants	Plants	Just plants		Other plants	Shrubs, primarily C korshinkii, and herbaceous species.		Mixed	At least some invasive/non-native	Aboveground	Unclear	Canopy diameter was 1.3+/-0.1 for the afforested layer in C. korshinskii sites; this was more less than half that of R. pseudoacacia sites, and was not compared with pre-afforestation or natural recovery plots.	Visual surveys
Assessing the Ecological Success of Restoration by Afforestation on the Chinese Loess Plateau	INT-076-2	16.1f	Afforestation with Caragana korshinskii (shrub species); in the Zhifanggou watershed, which is the state-level model watershed of the "Grain for Green" project.	Created habitats	Created other	Other terrestrial	China	Upper middle income	Asia + Pacific	No conflict declared	Yes	Author(s) associated with intervention & funding	X				Detailed				Space for time		X		Sp ri	Diversity		Plants	Plants	Just plants		Other plants	Shrubs, primarily C korshinkii, and herbaceous species.		Mixed	At least some invasive/non-native	Aboveground	Positive	Species richness in C. korshinskii plantations was 16.5+/-4.77 on N facing slopes, and 12.5+/-0.71 on S facing slopes, compared to just 5.33+/1.15 for pre-afforested sites (slope croplands) - this difference was significant for N facing slopes. Species richness did not differ significantly between C. korshinskii plantations and natural recovery sites; N facing sites had similar richnesses (19.33+…	Visual surveys
Assessing the Ecological Success of Restoration by Afforestation on the Chinese Loess Plateau	INT-076-2	16.1g	Afforestation with Caragana korshinskii (shrub species); in the Zhifanggou watershed, which is the state-level model watershed of the "Grain for Green" project.	Created habitats	Created other	Other terrestrial	China	Upper middle income	Asia + Pacific	No conflict declared	Yes	Author(s) associated with intervention & funding	X				Detailed				Space for time		X		Sp di	Diversity	Margalef diversity index	Plants	Plants	Just plants		Other plants	Shrubs, primarily C korshinkii, and herbaceous species.		Mixed	At least some invasive/non-native	Aboveground	Positive	Margalef diversity index was significantly higher in C. korshinskii plantations on N facing slopes than in the pre-afforested sites (crop slopes), but insignificantly higher on S facing slopes. It didn't differ significantly from R. pseudoacacia sites, or natural recovery sites.	Visual surveys
Assessing the Ecological Success of Restoration by Afforestation on the Chinese Loess Plateau	INT-076-2	16.1h	Afforestation with Caragana korshinskii (shrub species); in the Zhifanggou watershed, which is the state-level model watershed of the "Grain for Green" project.	Created habitats	Created other	Other terrestrial	China	Upper middle income	Asia + Pacific	No conflict declared	Yes	Author(s) associated with intervention & funding	X				Detailed				Space for time		X		Sp di	Diversity	Shannon diversity index (a.k.a. Shannon-Wiener diversity index)	Plants	Plants	Just plants		Other plants	Shrubs, primarily C korshinkii, and herbaceous species.		Mixed	At least some invasive/non-native	Aboveground	Positive	Shannon diversity index (a.k.a. Shannon-Wiener diversity index) was significantly higher in the N facing C. korshinskii plantation than the pre-afforested site (crop slope), but non-significantly higher in the S facing plantation. It did not significantly differ from the C. korshinkii plantations, or any of the natural recovery sites.	Visual surveys
Assessing the Ecological Success of Restoration by Afforestation on the Chinese Loess Plateau	INT-076-2	16.1i	Afforestation with Caragana korshinskii (shrub species); in the Zhifanggou watershed, which is the state-level model watershed of the "Grain for Green" project.	Created habitats	Created other	Other terrestrial	China	Upper middle income	Asia + Pacific	No conflict declared	Yes	Author(s) associated with intervention & funding	X				Detailed				Space for time		X		Sp ev	Diversity	Pielou's Equitability index	Plants	Plants	Just plants		Other plants	Shrubs, primarily C korshinkii, and herbaceous species.		Mixed	At least some invasive/non-native	Aboveground	No effect	Pielou's index (evenness) for C. korshinskii plantations did not significantly differ from the pre-afforested sites (slope croplands), or the R. pseudoacacia plantations, of the natural recovery sites.	Visual surveys
Assessing the Ecological Success of Restoration by Afforestation on the Chinese Loess Plateau	INT-076-2	16.1j	Afforestation with Caragana korshinskii (shrub species); in the Zhifanggou watershed, which is the state-level model watershed of the "Grain for Green" project.	Created habitats	Created other	Other terrestrial	China	Upper middle income	Asia + Pacific	No conflict declared	Yes	Author(s) associated with intervention & funding	X				Detailed				Space for time		X		Sp ev	Diversity	Sorensen's similarity index	Plants	Plants	Just plants		Other plants	Shrubs, primarily C korshinkii, and herbaceous species.		Mixed	At least some invasive/non-native	Aboveground	Unclear	Sorensen's similarity index showed that species composition was very different in the C. korshinskii plantations compared to the pre-afforestation (slope cropland) sites, at 0.13 for both N and S facing sites. Similarity was greater (although still low) with natural recovery sites (range: 0.26-0.62), and with R. pseudoacacia sites (range: 0.34-0.54).	Visual surveys
Assessing the Ecological Success of Restoration by Afforestation on the Chinese Loess Plateau	INT-076-3	16.2a	Afforestation with Robinia pseudoacacia (tree species) in the Zhifanggou watershed; the state-level model watershed of the "Grain for Green" project.	Created habitats	Created forest	Forest	China	Upper middle income	Asia + Pacific	No conflict declared	Yes	Author(s) associated with intervention & funding	X				Detailed				Space for time				Veg dens	Biomass	Percentage cover	Plants	Plants	Just plants		Trees & other plants	Trees, primarily R pseudoacacia, and herb and shrub spp.		Mixed	At least some invasive/non-native	Aboveground	Positive	Percentage cover was 44.2% +/-6.7; with 16.1%+/-20 for the shrub layer; and 31.9+/-29.4 for the herbaceous layer. Average percentage cover of forested sites (of all types) was 1.8-2 times pre-forested sites (stat sig), and 1.6-1.7 times tat of natural recovery site (stat sig).	Visual surveys
Assessing the Ecological Success of Restoration by Afforestation on the Chinese Loess Plateau	INT-076-3	16.2b	Afforestation with Robinia pseudoacacia (tree species) in the Zhifanggou watershed; the state-level model watershed of the "Grain for Green" project.	Created habitats	Created forest	Forest	China	Upper middle income	Asia + Pacific	No conflict declared	Yes	Author(s) associated with intervention & funding	X				Detailed					X	X		Stem dens	Biomass		Plants	Plants	Just plants		Trees & other plants	Trees, primarily R pseudoacacia, and herb and shrub spp.		Mixed	At least some invasive/non-native	Aboveground	Positive	1587.5+/-1504.7 individuals/ha for R. pseudoacacia (tree species).	Visual surveys
Assessing the Ecological Success of Restoration by Afforestation on the Chinese Loess Plateau	INT-076-3	16.2c	Afforestation with Robinia pseudoacacia (tree species) in the Zhifanggou watershed; the state-level model watershed of the "Grain for Green" project.	Created habitats	Created forest	Forest	China	Upper middle income	Asia + Pacific	No conflict declared	Yes	Author(s) associated with intervention & funding	X				Detailed					X	X		Fun id	Ecosystem functioning and population dynamics	Canopy structure	Plants	Plants	Just plants		Trees & other plants	Trees, primarily R pseudoacacia, and herb and shrub spp.		Mixed	At least some invasive/non-native	Aboveground	Unclear	More vertical canopy structure than reference (natural recovery) sites; few shrub plants in most cases.	Visual surveys
Assessing the Ecological Success of Restoration by Afforestation on the Chinese Loess Plateau	INT-076-3	16.2d	Afforestation with Robinia pseudoacacia (tree species) in the Zhifanggou watershed; the state-level model watershed of the "Grain for Green" project.	Created habitats	Created forest	Forest	China	Upper middle income	Asia + Pacific	No conflict declared	Yes	Author(s) associated with intervention & funding	X				Detailed					X	X		Age str	Ecosystem functioning and population dynamics	Vegetation height	Plants	Plants	Just plants		Trees & other plants	Trees, primarily R pseudoacacia, and herb and shrub spp.		Mixed	At least some invasive/non-native	Aboveground	Unclear	Canopy height of R. pseudoacacia afforested layers was 9.3m+/-3.7 (greater than C. korshinskii sites, which is expected given the latter is a shrub rather than a tree species; it was not compared with pre-afforestation or natural recovery sites). The shrub layer was 1.0m+/-0.7; the herbaceous layer was 0.33m+/-0.08.	Visual surveys
Assessing the Ecological Success of Restoration by Afforestation on the Chinese Loess Plateau	INT-076-3	16.2e	Afforestation with Robinia pseudoacacia (tree species) in the Zhifanggou watershed; the state-level model watershed of the "Grain for Green" project.	Created habitats	Created forest	Forest	China	Upper middle income	Asia + Pacific	No conflict declared	Yes	Author(s) associated with intervention & funding	X				Detailed					X			Age str	Ecosystem functioning and population dynamics	DBH	Plants	Plants	Just plants		Trees & other plants	Trees, primarily R pseudoacacia, and herb and shrub spp.		Mixed	At least some invasive/non-native	Aboveground	Unclear	Tree diameter at breast height was measured by not compared with any other site types.	Visual surveys
Assessing the Ecological Success of Restoration by Afforestation on the Chinese Loess Plateau	INT-076-3	16.2f	Afforestation with Robinia pseudoacacia (tree species) in the Zhifanggou watershed; the state-level model watershed of the "Grain for Green" project.	Created habitats	Created forest	Forest	China	Upper middle income	Asia + Pacific	No conflict declared	Yes	Author(s) associated with intervention & funding	X				Detailed					X	X		Cano	Biomass	Canopy diameter	Plants	Plants	Just plants		Trees & other plants	Trees, primarily R pseudoacacia, and herb and shrub spp.		Mixed	At least some invasive/non-native	Aboveground	Unclear	Canopy diameter was 2.9m+/-1.3 for the afforested layer in R. pseudoacacia sites; this was more than twice that of C. korshinskii sites, and was not compared with pre-afforestation or natural recovery plots.	Visual surveys
Assessing the Ecological Success of Restoration by Afforestation on the Chinese Loess Plateau	INT-076-3	16.2g	Afforestation with Robinia pseudoacacia (tree species) in the Zhifanggou watershed; the state-level model watershed of the "Grain for Green" project.	Created habitats	Created forest	Forest	China	Upper middle income	Asia + Pacific	No conflict declared	Yes	Author(s) associated with intervention & funding	X				Detailed				Space for time		X		Sp ri	Diversity		Plants	Plants	Just plants		Trees & other plants	Trees, primarily R pseudoacacia, and herb and shrub spp.		Mixed	At least some invasive/non-native	Aboveground	Positive	Species richness in R. pseudoacacia plantations was 19.0+/-5.94 on N facing slopes, and 13.5+/-3.42 on S facing slopes, compared to just 5.33+/1.15 for pre-afforested sites (slope croplands) - this difference was significant for N facing slopes. Species richness did not differ significantly between R. pseudoacacia plantations and natural recovery sites; N facing sites had similar richnesses (19.3…	Visual surveys
Assessing the Ecological Success of Restoration by Afforestation on the Chinese Loess Plateau	INT-076-3	16.2h	Afforestation with Robinia pseudoacacia (tree species) in the Zhifanggou watershed; the state-level model watershed of the "Grain for Green" project.	Created habitats	Created forest	Forest	China	Upper middle income	Asia + Pacific	No conflict declared	Yes	Author(s) associated with intervention & funding	X				Detailed				Space for time		X		Sp di	Diversity	Margalef diversity index	Plants	Plants	Just plants		Trees & other plants	Trees, primarily R pseudoacacia, and herb and shrub spp.		Mixed	At least some invasive/non-native	Aboveground	Positive	Margalef diversity index was significantly higher in R. pseudoacacia plantations on N facing slopes than in the pre-afforested sites (crop slopes), but insignificantly higher on S facing slopes. It didn't differ significantly from C. korshinskii sites or reference, natural recovery sites.	Visual surveys
Assessing the Ecological Success of Restoration by Afforestation on the Chinese Loess Plateau	INT-076-3	16.2i	Afforestation with Robinia pseudoacacia (tree species) in the Zhifanggou watershed; the state-level model watershed of the "Grain for Green" project.	Created habitats	Created forest	Forest	China	Upper middle income	Asia + Pacific	No conflict declared	Yes	Author(s) associated with intervention & funding	X				Detailed				Space for time		X		Sp di	Diversity	Shannon diversity index (a.k.a. Shannon-Wiener diversity index)	Plants	Plants	Just plants		Trees & other plants	Trees, primarily R pseudoacacia, and herb and shrub spp.		Mixed	At least some invasive/non-native	Aboveground	Positive	Shannon diversity index (a.k.a. Shannon-Wiener diversity index) was significantly higher in the N facing R. pseudoacacia plantation than the pre-afforested site (crop slope), but non-significantly higher in the S facing plantation. The S facing R. pseudoacacia slope being had a significantly lower Shannon index than both the herb and shrub N facing natural recovery sites. It did not significantly…	Visual surveys
Assessing the Ecological Success of Restoration by Afforestation on the Chinese Loess Plateau	INT-076-3	16.2j	Afforestation with Robinia pseudoacacia (tree species) in the Zhifanggou watershed; the state-level model watershed of the "Grain for Green" project.	Created habitats	Created forest	Forest	China	Upper middle income	Asia + Pacific	No conflict declared	Yes	Author(s) associated with intervention & funding	X				Detailed				Space for time		X		Sp ev	Diversity	Pielou's Equitability index	Plants	Plants	Just plants		Trees & other plants	Trees, primarily R pseudoacacia, and herb and shrub spp.		Mixed	At least some invasive/non-native	Aboveground	No effect	Pielou's index (evenness) for R. pseudoacacia plantations did not significantly differ from the pre-afforested sites (slope croplands). Pielou's index was, however, significantly higher in the N facing R. pseudoacacia plantations than in the S facing plantations. Pielou's index was also significantly lower in the S facing R. pseudoacacia plantations than the N facing natural recovery herb sites.	Visual surveys
Assessing the Ecological Success of Restoration by Afforestation on the Chinese Loess Plateau	INT-076-3	16.2k	Afforestation with Robinia pseudoacacia (tree species) in the Zhifanggou watershed; the state-level model watershed of the "Grain for Green" project.	Created habitats	Created forest	Forest	China	Upper middle income	Asia + Pacific	No conflict declared	Yes	Author(s) associated with intervention & funding	X				Detailed				Space for time		X		Sp ev	Diversity	Sorensen's similarity index	Plants	Plants	Just plants		Trees & other plants	Trees, primarily R pseudoacacia, and herb and shrub spp.		Mixed	At least some invasive/non-native	Aboveground	Unclear	Sorensen's similarity index showed that species composition was very different in the R. pseudoacacia plantations compared to the pre-afforestation (slope cropland) sites, ranging from 0.10 similarity index (S facing sites) to 0.12 (N facing sites). Similarity was greater (although still low) with natural recovery sites (range: 0.30-0.56), and with C. korshinskii sites (range: 0.34-0.54).	Visual surveys
Deriving Multiple Benefits from Carbon Market-Based Savanna Fire Management: An Australian Example	INT-025-1	17a	Kakadu National Park: prescribed burns to control wildfire: strategic, deliberate burning of parts of the savanna in the early dry season, with the aim of suppressing the more severe late dry season fires and hence reducing the extent of burning overall. E.g. reinforcing natural fire breaks like tracks and watercourses.	Management	Tropical and subtropical grasslands	Other terrestrial	Australia	High income	Asia + Pacific	No conflict declared	No		X			See table 2 in study for references	Secondary data so NA						X	X	Tax pre	Ecosystem composition	Fire frequency, long-unburnt vegetation and fire size thresholds	Plants	Plants	Animals & plants		Trees & other plants	Long-lived obligate seeder tree, Callitris intratropica; obligate seeder shrub taxa.		Unclear	Unclear/partially unclear	Aboveground	Unclear	Long-lived obligate seeder tree, Callitris intratropica: did not exceed fire frequency threshold of <0.2 late dry season (LDS) fires per year (to maintain tree stems >5cm DBH) in any period. Obligate seeder shrub taxa (only in uplands): Exceeded fire frequency threshold of <0.2 fires (of any kind) per year in all periods. Poorly dispersed obligate seeder plants: threshold of average patch size <1…	Remote sensing
Deriving Multiple Benefits from Carbon Market-Based Savanna Fire Management: An Australian Example	INT-025-1	17b	Kakadu National Park: prescribed burns to control wildfire: strategic, deliberate burning of parts of the savanna in the early dry season, with the aim of suppressing the more severe late dry season fires and hence reducing the extent of burning overall. E.g. reinforcing natural fire breaks like tracks and watercourses.	Management	Tropical and subtropical grasslands	Other terrestrial	Australia	High income	Asia + Pacific	No conflict declared	No		X			See table 2 in study for references	Secondary data so NA						X	X	Tax pre	Ecosystem composition	Fire frequency, long-unburnt vegetation and fire size thresholds	Animals	Animals	Animals & plants	Mammalia, aves, invertebrata		Small mammals (<5.5kg body mass - marsupials and rodents); birds (range of granivorous, frugivorous birds e.g. grasswrens - Amytornis spp.), grasshoppers.		Unclear	Unclear/partially unclear	Aboveground	Unclear	Small mammals and birds: Fire frequency exceeded threshold (0.3 fires/yr) in all three assessment periods in lowlands, and in all but one period in uplands, when the frequency was 0.3 exactly. Unburnt savanna threshold (25% of savanna left unburnt for at least 3 years) exceeded in all periods in lowlands (20% or less left unburnt for 3 or more years), but met in 2/3 periods in uplands. Poorly dis…	Remote sensing
Deriving Multiple Benefits from Carbon Market-Based Savanna Fire Management: An Australian Example	INT-025-2	17.1a	Litchfield National Park: prescribed burns to control wildfire: strategic, deliberate burning of parts of the savanna in the early dry season, with the aim of suppressing the more severe late dry season fires and hence reducing the extent of burning overall. E.g. reinforcing natural fire breaks like tracks and watercourses.	Management	Tropical and subtropical grasslands	Other terrestrial	Australia	High income	Asia + Pacific	No conflict declared	No		X			See table 2 in study for references	Secondary data so NA						X	X	Tax pre	Ecosystem composition	Fire frequency, long-unburnt vegetation and fire size thresholds	Plants	Plants	Animals & plants		Trees & other plants	Long-lived obligate seeder tree, Callitris intratropica; obligate seeder shrub taxa.		Unclear	Unclear/partially unclear	Aboveground	Unclear	Long-lived obligate seeder tree, Callitris intratropica: exceeded fire frequency threshold of <0.2 late dry season (LDS) fires per year (to maintain tree stems >5cm DBH) in 2/3 periods in both lowlands and uplands. Obligate seeder shrub taxa (only in uplands): exceeded fire frequency thrshold of <0.2 fires (of any kind) per year in all periods. Poorly dispersed obligate seeder plants: threshold o…	Remote sensing
Deriving Multiple Benefits from Carbon Market-Based Savanna Fire Management: An Australian Example	INT-025-2	17.1b	Litchfield National Park: prescribed burns to control wildfire: strategic, deliberate burning of parts of the savanna in the early dry season, with the aim of suppressing the more severe late dry season fires and hence reducing the extent of burning overall. E.g. reinforcing natural fire breaks like tracks and watercourses.	Management	Tropical and subtropical grasslands	Other terrestrial	Australia	High income	Asia + Pacific	No conflict declared	No		X			See table 2 in study for references	Secondary data so NA						X	X	Tax pre	Ecosystem composition	Fire frequency, long-unburnt vegetation and fire size thresholds	Animals	Animals	Animals & plants	Mammalia, aves, invertebrata		Small mammals (<5.5kg body mass - marsupials and rodents); birds (range of granivorous, frugivorous birds e.g. grasswrens - Amytornis spp.), grasshoppers.		Unclear	Unclear/partially unclear	Aboveground	Unclear	Small mammals and birds: Fire frequency exceeded threshold (0.3 fires/yr) in all three assessment periods in lowlands and uplands. Unburnt savanna threshold (25% of savanna left unburnt for at least 3 years) exceeded in all periods in both lowlands and uplands (less than 25% left unburnt). Poorly dispersed invertebrates, small mammlas and birds: treshold of average patch size <1km2 exceeded in al…	Remote sensing
Deriving Multiple Benefits from Carbon Market-Based Savanna Fire Management: An Australian Example	INT-025-3	17.2a	Nitmiluk National Park: prescribed burns to control wildfire: strategic, deliberate burning of parts of the savanna in the early dry season, with the aim of suppressing the more severe late dry season fires and hence reducing the extent of burning overall. E.g. reinforcing natural fire breaks like tracks and watercourses.	Management	Tropical and subtropical grasslands	Other terrestrial	Australia	High income	Asia + Pacific	No conflict declared	No		X			See table 2 in study for references	Secondary data so NA						X	X	Tax pre	Ecosystem composition	Fire frequency, long-unburnt vegetation and fire size thresholds	Plants	Plants	Animals & plants		Trees & other plants	Long-lived obligate seeder tree, Callitris intratropica; obligate seeder shrub taxa.		Unclear	Unclear/partially unclear	Aboveground	Unclear	Long-lived obligate seeder tree, Callitris intratropica: exceeded fire frequency threshold of <0.2 late dry season (LDS) fires per year (to maintain tree stems >5cm DBH) in 2/3 periods in both lowlands and uplands. Obligate seeder shrub taxa (only in uplands): exceeded fire frequency thrshold of <0.2 fires (of any kind) per year in all periods. Poorly dispersed obligate seeder plants: threshold o…	Remote sensing
Deriving Multiple Benefits from Carbon Market-Based Savanna Fire Management: An Australian Example	INT-025-3	17.2b	Nitmiluk National Park: prescribed burns to control wildfire: strategic, deliberate burning of parts of the savanna in the early dry season, with the aim of suppressing the more severe late dry season fires and hence reducing the extent of burning overall. E.g. reinforcing natural fire breaks like tracks and watercourses.	Management	Tropical and subtropical grasslands	Other terrestrial	Australia	High income	Asia + Pacific	No conflict declared	No		X			See table 2 in study for references	Secondary data so NA						X	X	Tax pre	Ecosystem composition	Fire frequency, long-unburnt vegetation and fire size thresholds	Animals	Animals	Animals & plants	Mammalia, aves, invertebrata		Small mammals (<5.5kg body mass - marsupials and rodents); birds (range of granivorous, frugivorous birds e.g. grasswrens - Amytornis spp.), grasshoppers.		Unclear	Unclear/partially unclear	Aboveground	Unclear	Small mammals and birds: Fire frequency exceeded threshold (0.3 fires/yr) in all three assessment periods in lowlands and uplands. Unburnt savanna threshold (25% of savanna left unburnt for at least 3 years) exceeded (less than 25% left unburnt) in 2/3 periods in both uplands and lowlands. Poorly dispersed invertebrates, small mammlas and birds: treshold of average patch size <1km2 exceeded in al…	Remote sensing
Deriving Multiple Benefits from Carbon Market-Based Savanna Fire Management: An Australian Example	INT-025-4	17.3a	West Arnhem Land Fire Abatement Programme: prescribed burns to control wildfire: strategic, deliberate burning of parts of the savanna in the early dry season, with the aim of suppressing the more severe late dry season fires and hence reducing the extent of burning overall. E.g. reinforcing natural fire breaks like tracks and watercourses.	Management	Tropical and subtropical grasslands	Other terrestrial	Australia	High income	Asia + Pacific	No conflict declared	Yes	Author(s) associated with intervention & funding	X			See table 2 in study for references	Secondary data so NA			X			X	X	Tax pre	Ecosystem composition	Fire frequency, long-unburnt vegetation and fire size thresholds	Plants	Plants	Animals & plants		Trees & other plants	Long-lived obligate seeder tree, Callitris intratropica; obligate seeder shrub taxa.		Unclear	Unclear/partially unclear	Aboveground	Positive	Long-lived obligate seeder tree, Callitris intratropica: exceeded fire frequency threshold of <0.2 late dry season (LDS) fires per year (to maintain tree stems >5cm DBH) in only the first of the three periods (i.e. before the intervention was implemented) in both lowlands and uplands. Obligate seeder shrub taxa (only in uplands): exceeded fire frequency thrshold of <0.2 fires (of any kind) per ye…	Remote sensing
Deriving Multiple Benefits from Carbon Market-Based Savanna Fire Management: An Australian Example	INT-025-4	17.3b	West Arnhem Land Fire Abatement Programme: prescribed burns to control wildfire: strategic, deliberate burning of parts of the savanna in the early dry season, with the aim of suppressing the more severe late dry season fires and hence reducing the extent of burning overall. E.g. reinforcing natural fire breaks like tracks and watercourses.	Management	Tropical and subtropical grasslands	Other terrestrial	Australia	High income	Asia + Pacific	No conflict declared	Yes	Author(s) associated with intervention & funding	X			See table 2 in study for references	Secondary data so NA			X			X	X	Tax pre	Ecosystem composition	Fire frequency, long-unburnt vegetation and fire size thresholds	Animals	Animals	Animals & plants	Mammalia, aves, invertebrata		Small mammals (<5.5kg body mass - marsupials and rodents); birds (range of granivorous, frugivorous birds e.g. grasswrens - Amytornis spp.), grasshoppers.		Unclear	Unclear/partially unclear	Aboveground	Positive	Small mammals and birds: Fire frequency exceeded threshold (0.3 fires/yr) in all three assessment periods in lowlands, but not exceeded in any period in uplands. The fire frequency was 0.3/yr in 2000-4 before the intervention was implemented, but decreased below 0.3 in the next two periods. Unburnt savanna threshold (25% of savanna left unburnt for at least 3 years) exceeded or met in the first p…	Remote sensing
Pastoralism and ecosystem-based adaptation in Kenyan Masailand	INT-026-1	18a	Privatized PES program and restricted conservation area: landowners are allowed limited livestock grazing but are required to relocate their settlements from the land set aside for wildlife tourism. In turn, the tourist operators pay each landowner an annual fee of US$39/ha (2009 rates) through a conservancy management company.	Combination	Tropical and subtropical grasslands	Other terrestrial	Kenya	Lower middle income	Africa	No conflict declared	No			X			Poor detail					X			Biom	Biomass	Biomass	Plants	Plants	Animals & plants		Unclear	Plants		Unclear	Unclear/partially unclear	Aboveground	Unclear	The authors give the impression that the intervention increase aboveground biomass, but this was not explicitly shown or stated. They do show through qualitative research methods, however, that this biomass benefitted the pastoral household drought coping mechanisms related to moblity and diversification.	Qualitative primary data
Pastoralism and ecosystem-based adaptation in Kenyan Masailand	INT-026-1	18b	Privatized PES program and restricted conservation area: landowners are allowed limited livestock grazing but are required to relocate their settlements from the land set aside for wildlife tourism. In turn, the tourist operators pay each landowner an annual fee of US$39/ha (2009 rates) through a conservancy management company.	Combination	Tropical and subtropical grasslands	Other terrestrial	Kenya	Lower middle income	Africa	No conflict declared	No			X			Poor detail					X			Tax pre	Ecosystem composition	Wildlife [presence]	Animals	Animals	Animals & plants			Wildlife that attracts tourists		Unclear	Unclear/partially unclear	Aboveground	Unclear	The authors give the impressions that the intervention increased the icidence/state of wildlife (for toursim) in the area, and they show through qualitative research that this benefitted the pastoral household drought coping mechanisms related to diversification, but have both positive and negative effects on mobility, due to livestock predation.	Qualitative primary data
Pastoralism and ecosystem-based adaptation in Kenyan Masailand	INT-026-2	18.1a	Privatized PES program with the entire area designed for wildlife conservation: A PES program, the Wildlife Conservation Lease, was initiated in 2000 and by 2010 covered an area of 16,700 ha and involved 350 pastoral families. The PES program requires participating landowners to avoid fencing or sub-dividing their land and to allow free movement of wildlife in return for being paid an annual fee …	Combination	Tropical and subtropical grasslands	Other terrestrial	Kenya	Lower middle income	Africa	No conflict declared	No			X			Poor detail					X			Biom	Biomass	Biomass	Plants	Plants	Animals & plants		Unclear	Plants		Unclear	Unclear/partially unclear	Aboveground	Unclear	The authors give the impression that the intervention increase aboveground biomass, but this was not explicitly shown or stated. They do show through qualitative research methods, however, that this biomass benefitted the pastoral household drought coping mechanisms related to moblity and diversification.	Qualitative primary data
Pastoralism and ecosystem-based adaptation in Kenyan Masailand	INT-026-2	18.1b	Privatized PES program with the entire area designed for wildlife conservation: A PES program, the Wildlife Conservation Lease, was initiated in 2000 and by 2010 covered an area of 16,700 ha and involved 350 pastoral families. The PES program requires participating landowners to avoid fencing or sub-dividing their land and to allow free movement of wildlife in return for being paid an annual fee …	Combination	Tropical and subtropical grasslands	Other terrestrial	Kenya	Lower middle income	Africa	No conflict declared	No			X			Poor detail					X			Tax pre	Ecosystem composition	Wildlife [presence]	Animals	Animals	Animals & plants			Wildlife that attracts tourists		Unclear	Unclear/partially unclear	Aboveground	Unclear	The authors give the impressions that the intervention increased the icidence/state of wildlife (for toursim) in the area, and they show through qualitative research that this benefitted the pastoral household drought coping mechanisms related to diversification, but have both positive and negative effects on mobility, due to livestock predation.	Qualitative primary data
Pastoralism and ecosystem-based adaptation in Kenyan Masailand	INT-026-3	18.2a	No PES, but communally owned and managed with a restricted conservation area for wildlife tourism includes conservancy area; tourism lodge setup and revenue invested in local projects.	Combination	Tropical and subtropical grasslands	Other terrestrial	Kenya	Lower middle income	Africa	No conflict declared	No			X			Poor detail					X			Biom	Biomass	Biomass	Plants	Plants	Animals & plants		Unclear	Plants		Unclear	Unclear/partially unclear	Aboveground	Unclear	The authors give the impression that the intervention increase aboveground biomass, but this was not explicitly shown or stated. They do show through qualitative research methods, however, that this biomass benefitted the pastoral household drought coping mechanisms related to moblity and diversification.	Qualitative primary data
Pastoralism and ecosystem-based adaptation in Kenyan Masailand	INT-026-3	18.2b	No PES, but communally owned and managed with a restricted conservation area for wildlife tourism includes conservancy area; tourism lodge setup and revenue invested in local projects.	Combination	Tropical and subtropical grasslands	Other terrestrial	Kenya	Lower middle income	Africa	No conflict declared	No			X			Poor detail					X			Tax pre	Ecosystem composition	Wildlife [presence]	Animals	Animals	Animals & plants			Wildlife that attracts tourists		Unclear	Unclear/partially unclear	Aboveground	Unclear	The authors give the impressions that the intervention increased the icidence/state of wildlife (for toursim) in the area, and they show through qualitative research that this benefitted the pastoral household drought coping mechanisms related to diversification, but have both positive and negative effects on mobility, due to livestock predation.	Qualitative primary data
Evidence of exceptional oyster-reef resilience to fluctuations in sea level	INT-100-1	19a	Artificially constructed oyster reefs: started as mounds of loose, recycled oyster shell (a.k.a. clutch shell) measuring 3 x 5 x 0.15m (width x length x height), followed by natural recruitment of oyster larvae from the estuary (Back Sound, North Carolina). After recruitment, the constructed reefs ranged from 5 to 10m in diameter - similar in size to many natural reef in the study area (although …	Restoration	Deltas and estuaries	Coastal/marine/freshwater	United States of America	High income	North America	No conflict declared	Yes	Field experiment implemented by author(s)	X				Detailed			X					Gro	Ecosystem functioning and population dynamics	Maximum growth rate	Animals	Animals	Just animals	Bivalvia		Crassostrea virginica (eastern oyster) used in reef construction.		Native	Native	Aquatic	Positive	Decade-old artificial reefs: maximum growth rate remained at around 2cm/year from 2010 to 2015, despite a 4cm increase in average sea level rise over the same period. This suggests that the increase in sea level over a few years did not disturb growth rate. Although, reading from the table, the peak was 1.9cm/year in 2010-12 and 1.72cm/year in 2012-15, so there was a slight decrease in growth rat…	Remote sensing
Evidence of exceptional oyster-reef resilience to fluctuations in sea level	INT-100-1	19b	Artificially constructed oyster reefs: started as mounds of loose, recycled oyster shell (a.k.a. clutch shell) measuring 3 x 5 x 0.15m (width x length x height), followed by natural recruitment of oyster larvae from the estuary (Back Sound, North Carolina). After recruitment, the constructed reefs ranged from 5 to 10m in diameter - similar in size to many natural reef in the study area (although …	Restoration	Deltas and estuaries	Coastal/marine/freshwater	United States of America	High income	North America	No conflict declared	Yes	Field experiment implemented by author(s)	X				Detailed			X					Accr	Ecosystem functioning and population dynamics	Location of growth	Animals	Animals	Just animals	Bivalvia		Crassostrea virginica (eastern oyster) used in reef construction.		Native	Native	Aquatic	Positive	Decade-old artificial reefs: the optimal growth zone (OGZ) was positioned between -0.15 and -0.3m 2010-12. The zone of high growth [assumed to be the same as the OGZ] expanded by 34% to span -0.05 to -0.49m 2012-15. Correspondingly, the elevation of the growth peak changed from -17cm in 2010-12 to -9cm 2012-15. These changes track the trend of mean sea level which increased from -5.3 to -1.6m ove…	Remote sensing
Evidence of exceptional oyster-reef resilience to fluctuations in sea level	INT-100-1	19c	Artificially constructed oyster reefs: started as mounds of loose, recycled oyster shell (a.k.a. clutch shell) measuring 3 x 5 x 0.15m (width x length x height), followed by natural recruitment of oyster larvae from the estuary (Back Sound, North Carolina). After recruitment, the constructed reefs ranged from 5 to 10m in diameter - similar in size to many natural reef in the study area (although …	Restoration	Deltas and estuaries	Coastal/marine/freshwater	United States of America	High income	North America	No conflict declared	Yes	Field experiment implemented by author(s)	X				Detailed			X					Gro	Ecosystem functioning and population dynamics	Volume increase rate	Animals	Animals	Just animals	Bivalvia		Crassostrea virginica (eastern oyster) used in reef construction.		Native	Native	Aquatic	Positive	Decade-old artificial reefs: volume increase was 0.04m3/year on average, with most of this growth occurring in the Optimal Growth Zone. This outweighed minor reef losses of -0.01m3/year from the rref crests; the base of the reefs also lost volume (-0.02m3/year) 2010-12, but regained in 2012-15 (0.03m3/year). The authors suggest that erosion was 'most likely the response of these reefs returning t…	Remote sensing
Created mangrove wetlands store belowground carbon and surface elevation change enables them to adjust to sea-level rise	INT-102-1	20a	Created mangrove wetlands in Tampa Bay, Florida: nine mangrove wetlands were originally established as tidal salt marshes, which transitioned naturally to mangrove forests over time. The areas were mechanically graded or modified to a known intertidal elevation, to facilitate natural tidal flooding, using a mix of upland soils atop underlying sand, and then plated with marsh grass, before mangrov…	Restoration	Mangroves	Coastal/marine/freshwater	United States of America	High income	North America	No conflict declared	Yes	Field experiment implemented by author(s)	X				Detailed				Space for time				Accr	Ecosystem functioning and population dynamics	Vertical accretion rate	NA	Microorganisms, fungi & other	Just other			NA: Sediment	X	NA	NA	Soil	Positive	Vertical accretion of sediments ranged from 3.7-9.1mm/yr, with no evident difference between created and reference mangrove wetlands. This is a positive result because the created mangroves achieved a similar level of accretion to the reference site, contirbuting to their ability to keep up with sea level rise.	Visual surveys
Created mangrove wetlands store belowground carbon and surface elevation change enables them to adjust to sea-level rise	INT-102-1	20b	Created mangrove wetlands in Tampa Bay, Florida: nine mangrove wetlands were originally established as tidal salt marshes, which transitioned naturally to mangrove forests over time. The areas were mechanically graded or modified to a known intertidal elevation, to facilitate natural tidal flooding, using a mix of upland soils atop underlying sand, and then plated with marsh grass, before mangrov…	Restoration	Mangroves	Coastal/marine/freshwater	United States of America	High income	North America	No conflict declared	Yes	Field experiment implemented by author(s)	X				Detailed				Space for time				Accr	Ecosystem functioning and population dynamics	Surface elevation change	NA	Microorganisms, fungi & other	Just other			NA: Surface elevation	X	NA	NA	Soil	Positive	Surface elevetation rate averaged 7.2mm/yr over nine created mangrove sites (3.9mm/yr on average) in the period 20-25 years after initial establishment. That's roughly 2.7 times contemporary sea level rise in the bay (compared to only 1.5 times for reference mangroves). Surface elevation rates were initially higher for created than reference mangroves, but settled over time to rates closer to the…	Visual surveys
Are mangroves worth replanting? The direct economic benefits of a community-based reforestation project	INT-110-1	21a	Community-based mangrove reforestation project: 'the mangrove was replanted on mudflats once thickly forested with mangrove but where exploitation for firewood and building materials had left only a few isolated trees. ... The mudflat was initially planted in 1990 with 45 ha of Rhizophora spp. and 5 ha of Nypa fruticans by a cooperative of 28 local families ... Pest damage to the plantation in 19…	Combination	Mangroves	Coastal/marine/freshwater	Philippines	Lower middle income	Asia + Pacific	No conflict declared	No			X			Detailed				Inferred historical baseline by interviewees				Per	Unspecified	Biodiversity	NA	Microorganisms, fungi & other	Just other			Unspecified biodiversity relating to mangrove forests		Unclear	Unclear/partially unclear	NA	Positive	77% of local fishers perceived an increase in biodiversity as a benefit from mangrove protection. The proportion was greatest for those that fished in the mangrove in conjunction with other habitats (85%), and lowest in those that fish in coastal areas (63%), and intermediate for those than fish only in the mangrove (84%) and along the shoreline only (79%).	Qualitative primary data
Climate change mitigation through reforestation in Godavari mangroves in India	INT-116-1	22a	Restoration of mangroves in the Godavari Delta. It involved digging of main canals at a 45 degree angle to the natural creeks, and side canals at 30 degrees to the main canals (1999-2004). About 55,000 eight-month old mangrove saplings were planted with 2m spacing, up until 2006. Three endemic mangrove species were the most commonly planted (A. marina, A. officinalis and Excoecaria agallocha), wi…	Restoration	Mangroves	Coastal/marine/freshwater	India	Lower middle income	Asia + Pacific	No conflict declared	No			X			Absent			X					Sp ab	Ecosystem composition	Population size	Animals	Animals	Just animals	Malacostraca, mammalia, aves		Crabs, otters and birds		Unclear	Unclear/partially unclear	Aboveground & aquatic	Positive	Author states that 'Since then [mangrove restoration], fish catches have been greater than before and biodiversity of the area has enhanced as indicated by an increase in crab, otter and avian populations.'	Unclear
Lag Effects in the Impacts of Mass Coral Bleaching on Coral Reef Fish, Fisheries, and Ecosystems	INT-128-1	23a	Two, long-standing no-take marine protected areas (MPAs) across the inner granitic islands of the Seychelles: Sainte Anne Marine National Park, and Cousin Island Special Reserve.	Protection	Coral reefs	Coastal/marine/freshwater	Seychelles	High income	Africa	No conflict declared	No		X				Detailed	X							Fun di	Diversity	Structural complexity	Animals & plants & NA	Plants, animals, & other	Animals & plants	Anthozoa	Other plants	Benthic composition categories: live branching, plating, massive, corymbose and encrusting coral, soft coral, macroalgae, rock, rubble, sand, and dead branching coral	X	Unclear	Unclear/partially unclear	Aquatic	No effect	Structural complexity of benthos declined 1994-2005, both within MPAs and in control sites (fished areas). 21 sites were surveyed covering over 50,000m2 of coral reef habitat, with three sites surveyed each year.	Visual surveys
Lag Effects in the Impacts of Mass Coral Bleaching on Coral Reef Fish, Fisheries, and Ecosystems	INT-128-1	23b	Two, long-standing no-take marine protected areas (MPAs) across the inner granitic islands of the Seychelles: Sainte Anne Marine National Park, and Cousin Island Special Reserve.	Protection	Coral reefs	Coastal/marine/freshwater	Seychelles	High income	Africa	No conflict declared	No		X				Detailed	X							Veg dens	Biomass	Percentage cover	Animals & plants & NA	Plants, animals, & other	Animals & plants	Anthozoa	Other plants	Benthic composition categories: live branching, plating, massive, corymbose and encrusting coral, soft coral, macroalgae, rock, rubble, sand, and dead branching coral	X	Unclear	Unclear/partially unclear	Aquatic	No effect	The benthic cover type that decreased the most was carbonate habitats, and the reductions were greater in the MPAs than in the fished areas, due to the higher initial cover of complex corals declining to a similar base level as the fished areas by 2005. Cover of simple corals remained relatively stable 1994-2005.	Visual surveys
Lag Effects in the Impacts of Mass Coral Bleaching on Coral Reef Fish, Fisheries, and Ecosystems	INT-128-1	23c	Two, long-standing no-take marine protected areas (MPAs) across the inner granitic islands of the Seychelles: Sainte Anne Marine National Park, and Cousin Island Special Reserve.	Protection	Coral reefs	Coastal/marine/freshwater	Seychelles	High income	Africa	No conflict declared	No		X				Detailed	X							Biom	Biomass	Species biomass	Animals	Animals	Animals & plants	Pisces		Target fish species		Unclear	Unclear/partially unclear	Aquatic	Positive	Biomass of target fish species individuls above size at first capture varied over time, although over 70% not significantly changing. The target fish assemblage as a whole had a greater biomass in MPAs than fished areas, but there was no trend in overall biomass over time. Piscivore biomass decreased over time, especially in MPAs, whereas herbivore biomass increased over time and was higher in MP…	Visual surveys
Lag Effects in the Impacts of Mass Coral Bleaching on Coral Reef Fish, Fisheries, and Ecosystems	INT-128-1	23d	Two, long-standing no-take marine protected areas (MPAs) across the inner granitic islands of the Seychelles: Sainte Anne Marine National Park, and Cousin Island Special Reserve.	Protection	Coral reefs	Coastal/marine/freshwater	Seychelles	High income	Africa	No conflict declared	No		X				Detailed	X							Age str	Ecosystem functioning and population dynamics	Size spectra	Animals	Animals	Animals & plants	Pisces		134 species of reef-associated, diurnally active, noncryptic fish (>8cm)		Unclear	Unclear/partially unclear	Aquatic	No effect	The size spectra slope became less steep from 1994-2005 in all but one site, without a difference between MPAs and fished sites; this was caused by a relative decline of smaller fish (<30cm), and a relative increase in larger fish (>45cm). I.e. dying fish were not being sufficiently replaced by juveniles. The authors believe that 'this represents a time-lag response to a reduction in reef structu…	Visual surveys
Lag Effects in the Impacts of Mass Coral Bleaching on Coral Reef Fish, Fisheries, and Ecosystems	INT-128-1	23e	Two, long-standing no-take marine protected areas (MPAs) across the inner granitic islands of the Seychelles: Sainte Anne Marine National Park, and Cousin Island Special Reserve.	Protection	Coral reefs	Coastal/marine/freshwater	Seychelles	High income	Africa	No conflict declared	No		X				Detailed	X							Sp ab	Ecosystem composition	Number of individuals	Animals	Animals	Animals & plants	Pisces		135 species of reef-associated, diurnally active, noncryptic fish (>8cm)		Unclear	Unclear/partially unclear	Aquatic	Positive	Greater abundance of fish in MPAs than fished sites (stat sig). However, there were some fish groups that declined more in MPAs than in fished sites (e.g. corallivores, planktivores, and medium sized piscivores).	Visual surveys
Community involvement in management for maintaining coral reef resilience and biodiversity in southern Caribbean marine protected areas	INT-130-1	24a	National Natural Park Rosario and San Bernardo Corals is an extensive marine protected area (MPA), established in 1977, and covering the most diverse and developed coral reefs in the Colombian continental platform. This study looked at 16 reef sites within the MPA (and compared with eight outside the MPA); the MPA also includes mangroves and seagrass.	Protection	Coral reefs	Coastal/marine/freshwater	Colombia	Upper middle income	Latin America + Caribbean	No conflict declared	No		X				Detailed	X							Sp ab	Ecosystem composition	Number of individuals	Animals	Animals	Animals & plants	Pisces		Three economically important families of fish: Lutjanidae, Scaridae, and Serranidae		Unclear	Unclear/partially unclear	Aquatic	No effect	Abundances of three economically important fish families were low both in and outside the MPA, and there was no significant difference in abundance between in and outside the MPA.	Visual surveys
Community involvement in management for maintaining coral reef resilience and biodiversity in southern Caribbean marine protected areas	INT-130-1	24b	National Natural Park Rosario and San Bernardo Corals is an extensive marine protected area (MPA), established in 1977, and covering the most diverse and developed coral reefs in the Colombian continental platform. This study looked at 16 reef sites within the MPA (and compared with eight outside the MPA); the MPA also includes mangroves and seagrass.	Protection	Coral reefs	Coastal/marine/freshwater	Colombia	Upper middle income	Latin America + Caribbean	No conflict declared	No		X				Detailed	X							Sp ri	Diversity		Animals & plants	Plants, animals, & other	Animals & plants	Anthozoa, pisces		Benthic community: sponges, hidrocorals, scleractinians, gorgonians, algae; and fish (including the economically important families: lutjanidae, scaridae and serranidae)		Unclear	Unclear/partially unclear	Aquatic	No effect	Average species richness was 13.62 (range: 7-20) inside the MPA compared to 12.62 (9-17) outside. Bootstrapping showed no differences between original and resampled values. So there were marginally but insignificantly more species inside the MPA.	Visual surveys
Community involvement in management for maintaining coral reef resilience and biodiversity in southern Caribbean marine protected areas	INT-130-1	24c	National Natural Park Rosario and San Bernardo Corals is an extensive marine protected area (MPA), established in 1977, and covering the most diverse and developed coral reefs in the Colombian continental platform. This study looked at 16 reef sites within the MPA (and compared with eight outside the MPA); the MPA also includes mangroves and seagrass.	Protection	Coral reefs	Coastal/marine/freshwater	Colombia	Upper middle income	Latin America + Caribbean	No conflict declared	No		X				Detailed	X							Sp di	Diversity	Shannon diversity index (a.k.a. Shannon-Wiener diversity index)	Animals & plants	Plants, animals, & other	Animals & plants	Anthozoa, pisces		Benthic community: sponges, hidrocorals, scleractinians, gorgonians, algae; and fish (including the economically important families: lutjanidae, scaridae and serranidae)		Unclear	Unclear/partially unclear	Aquatic	No effect	Average species diversity (shannon-weiner index) was 0.66 (range: 0.51–0.75) inside the MPA compared to 0.65 (0.59–0.72) outside. So diversity was marginally but insignificantly higher inside the MPA. Bootstrapping showed no differences between original and resampled values.	Visual surveys
Community involvement in management for maintaining coral reef resilience and biodiversity in southern Caribbean marine protected areas	INT-130-1	24d	National Natural Park Rosario and San Bernardo Corals is an extensive marine protected area (MPA), established in 1977, and covering the most diverse and developed coral reefs in the Colombian continental platform. This study looked at 16 reef sites within the MPA (and compared with eight outside the MPA); the MPA also includes mangroves and seagrass.	Protection	Coral reefs	Coastal/marine/freshwater	Colombia	Upper middle income	Latin America + Caribbean	No conflict declared	No		X				Detailed	X							Sp ev	Diversity	Pielou's Equitability index	Animals & plants	Plants, animals, & other	Animals & plants	Anthozoa, pisces		Benthic community: sponges, hidrocorals, scleractinians, gorgonians, algae; and fish (including the economically important families: lutjanidae, scaridae and serranidae)		Unclear	Unclear/partially unclear	Aquatic	No effect	Average species evenness (Pielou's index) was 0.96 (range: 0.75–1.10) inside the MPA compared to 0.96 (0.86–1.06) outside. So there was no indication of species evenness differing between within and outside the MPA. Bootstrapping showed no differences between original and resampled values.	Visual surveys
Community involvement in management for maintaining coral reef resilience and biodiversity in southern Caribbean marine protected areas	INT-130-1	24e	National Natural Park Rosario and San Bernardo Corals is an extensive marine protected area (MPA), established in 1977, and covering the most diverse and developed coral reefs in the Colombian continental platform. This study looked at 16 reef sites within the MPA (and compared with eight outside the MPA); the MPA also includes mangroves and seagrass.	Protection	Coral reefs	Coastal/marine/freshwater	Colombia	Upper middle income	Latin America + Caribbean	No conflict declared	No		X				Detailed	X							O	Ecosystem composition	Colonies per unit area	Animals	Animals	Animals & plants	Anthozoa		Four focal coral species: Acropora palmata and A. cervicornis (critically endangered), and Siderastrea siderea and Diploria labyrinthiformis (potentiall yvulerable) - the latter were chosen as indicators of sediment load.		Unclear	Unclear/partially unclear	Aquatic	No effect	Number of colonies of the four focal coral species was higher inside than outside the MPA, however there was no statistically significant difference in densities between inside and outside for any of the species.	Visual surveys
Community involvement in management for maintaining coral reef resilience and biodiversity in southern Caribbean marine protected areas	INT-130-1	24f	National Natural Park Rosario and San Bernardo Corals is an extensive marine protected area (MPA), established in 1977, and covering the most diverse and developed coral reefs in the Colombian continental platform. This study looked at 16 reef sites within the MPA (and compared with eight outside the MPA); the MPA also includes mangroves and seagrass.	Protection	Coral reefs	Coastal/marine/freshwater	Colombia	Upper middle income	Latin America + Caribbean	No conflict declared	No		X				Detailed	X							Age str	Ecosystem functioning and population dynamics	Size spectra	Animals	Animals	Animals & plants	Anthozoa		Four focal coral species: Acropora palmata and A. cervicornis (critically endangered), and Siderastrea siderea and Diploria labyrinthiformis (potentiall yvulerable) - the latter were chosen as indicators of sediment load.		Unclear	Unclear/partially unclear	Aquatic	No effect	No significant difference in skewness and kurtosis in size distribution of the four focal coral species between inside and outside the MPA. The populations of all four species were positively skewed, dominated by small colonies.	Visual surveys
Community involvement in management for maintaining coral reef resilience and biodiversity in southern Caribbean marine protected areas	INT-130-1	24g	National Natural Park Rosario and San Bernardo Corals is an extensive marine protected area (MPA), established in 1977, and covering the most diverse and developed coral reefs in the Colombian continental platform. This study looked at 16 reef sites within the MPA (and compared with eight outside the MPA); the MPA also includes mangroves and seagrass.	Protection	Coral reefs	Coastal/marine/freshwater	Colombia	Upper middle income	Latin America + Caribbean	No conflict declared	No		X				Detailed	X							Veg dens	Biomass	Percentage cover	Animals & plants	Plants, animals, & other	Animals & plants	Anthozoa, pisces		Benthic community: sponges, hidrocorals, scleractinians, gorgonians, algae; and fish (including the economically important families: lutjanidae, scaridae and serranidae)		Unclear	Unclear/partially unclear	Aquatic	No effect	Average live coral cover was greater inside the MPA, but algae, sponge, and gorgonians were higher outside the MPA. However these differences were not significant (the authors attribute this to dead coral and rubble being the dominant substrate). 'Live coral cover was represented mainly by Agaricia tenuifolia and Porites astreoides in most sites.'	Visual surveys
Community involvement in management for maintaining coral reef resilience and biodiversity in southern Caribbean marine protected areas	INT-130-1	24h	National Natural Park Rosario and San Bernardo Corals is an extensive marine protected area (MPA), established in 1977, and covering the most diverse and developed coral reefs in the Colombian continental platform. This study looked at 16 reef sites within the MPA (and compared with eight outside the MPA); the MPA also includes mangroves and seagrass.	Protection	Coral reefs	Coastal/marine/freshwater	Colombia	Upper middle income	Latin America + Caribbean	No conflict declared	No		X				Detailed	X							Com c	Ecosystem composition	Classification analysis	Animals & plants	Plants, animals, & other	Animals & plants	Anthozoa, pisces		Benthic community: sponges, hidrocorals, scleractinians, gorgonians, algae; and fish (including the economically important families: lutjanidae, scaridae and serranidae)		Unclear	Unclear/partially unclear	Aquatic	No effect	Classification analyses with coral abundance data showed slight diferences with respect to their management status but no clear aggregations of stations were observed. Similarity values were overall high among sites (~80%), and most stations inside the MPA formed one cluster.'	Visual surveys
Community involvement in management for maintaining coral reef resilience and biodiversity in southern Caribbean marine protected areas	INT-130-1	24i	National Natural Park Rosario and San Bernardo Corals is an extensive marine protected area (MPA), established in 1977, and covering the most diverse and developed coral reefs in the Colombian continental platform. This study looked at 16 reef sites within the MPA (and compared with eight outside the MPA); the MPA also includes mangroves and seagrass.	Protection	Coral reefs	Coastal/marine/freshwater	Colombia	Upper middle income	Latin America + Caribbean	No conflict declared	No		X				Detailed					X			Com c	Ecosystem composition	Symbiont combinations	Protists	Microorganisms, fungi & other	Animals & plants	Dinoflagellata (superclass)		Four Symbiodinium clades identified, including at least 10 ITS2-types.		Unclear	Unclear/partially unclear	Aquatic	Unclear	15 (35% of 37 total) coral species included more than one clade of dinoflagellate, both within the same colony and between colonies of the same species. The authors suggest that 'Finding a higher proportion [than the worldwide pattern] of polytypic coral colonies, i.e., harboring more than one zooxanthellae type simultaneously enhances the potential for resistance and resilience against bleaching…	Ex situ
Coastal protection and conservation on sandy beaches and dunes: context-dependent tradeoffs in ecosystem service supply	INT-027-1	25a	Seven habitat restoration areas on Oregon and southern Washington beaches. Restoration involved foredune and beachgrass removal, predator management, and recreational beach restrictions. 'Beachgrass removal was conducted one to three years prior to conducting the surveys, using bulldozing, discing, herbicide, hand pulling, or burning.' The beachgrass had been intentionally introduced in the early…	Combination	Coastal	Coastal/marine/freshwater	United States of America	High income	North America	No conflict declared	No		X		X	Lauten, D. J. et al. 2014. The distribution and reproductive success of the western snowy plover along the Oregon Coast—2014. Oregon Biodiversity Information Center, Portland State University, Portland, Oregon, USA. AND Pearson, S. F., et al. 2015.Washington State Snowy Plover Population Monitoring, Research, and Management: 2014 Nesting Season Research Progress Report. Washington Department of F…	Secondary data so NA			X					Repr	Ecosystem functioning and population dynamics	Productivity (fledglings per breeding adult male)	Animals	Animals	Animals & plants	Aves		Western snowy plover (Charadrius nivosus nivosus)		Native	At least some invasive/non-native	Aboveground	Unclear	Plover productivity (fledglings per breeding adult male) responded positively to beachgrass removal and predator control interventions, although this varied among habitat restoration areas. During years of lethal predator controls, mean plover productivity in habitat restoration areas rose by 1.4- to 2.2-fold. Unclear outcome because compared against another intervention (planting of beachgrass, …	Visual surveys
Coastal protection and conservation on sandy beaches and dunes: context-dependent tradeoffs in ecosystem service supply	INT-027-1	25b	Seven habitat restoration areas on Oregon and southern Washington beaches. Restoration involved foredune and beachgrass removal, predator management, and recreational beach restrictions. 'Beachgrass removal was conducted one to three years prior to conducting the surveys, using bulldozing, discing, herbicide, hand pulling, or burning.' The beachgrass had been intentionally introduced in the early…	Combination	Coastal	Coastal/marine/freshwater	United States of America	High income	North America	No conflict declared	No		X				Detailed	X							Sp ri	Diversity		Plants	Plants	Animals & plants		Grasses & other plants	Endemic and ecotic dune plant and bech plant richness.		Mixed	At least some invasive/non-native	Aboveground	Unclear	Beachgrass removal (habitat restoration) was associated with an 84% decrease in native backdune plant richness, a 29% decrease in exotic backdune plant richness, and no change in either endemic beach and foredune plant richness or exotic beach and foredune plant richness. Unclear outcome because compared against another intervention (planting of beachgrass, which is also the historical baseline).	Visual surveys
Coastal protection and conservation on sandy beaches and dunes: context-dependent tradeoffs in ecosystem service supply	INT-027-1	25c	Seven habitat restoration areas on Oregon and southern Washington beaches. Restoration involved foredune and beachgrass removal, predator management, and recreational beach restrictions. 'Beachgrass removal was conducted one to three years prior to conducting the surveys, using bulldozing, discing, herbicide, hand pulling, or burning.' The beachgrass had been intentionally introduced in the early…	Combination	Coastal	Coastal/marine/freshwater	United States of America	High income	North America	No conflict declared	No		X				Detailed	X							Veg dens	Biomass	Percentage cover	Plants	Plants	Animals & plants		Trees & other plants	Native dune grass (Elymus mollis) and natie forbs (Abronia latifolia, Ambrosia chamissonis,and Calystegia soldanella).		Native	At least some invasive/non-native	Aboveground	Unclear	Beachgrass removal (habitat restoration) significanlty reduced native dune grass cover (Elymu mollis) at most sites, but did not affect the incidence of native forbs. Unclear outcome because compared against another intervention (planting of beachgrass, which is also the historical baseline).	Visual surveys
Coastal protection and conservation on sandy beaches and dunes: context-dependent tradeoffs in ecosystem service supply	INT-027-1	25d	Seven habitat restoration areas on Oregon and southern Washington beaches. Restoration involved foredune and beachgrass removal, predator management, and recreational beach restrictions. 'Beachgrass removal was conducted one to three years prior to conducting the surveys, using bulldozing, discing, herbicide, hand pulling, or burning.' The beachgrass had been intentionally introduced in the early…	Combination	Coastal	Coastal/marine/freshwater	United States of America	High income	North America	No conflict declared	No		X				Detailed	X							Sp ab	Ecosystem composition	Probability of occurrence	Plants	Plants	Animals & plants		Other plants	Threatened pink sand verbena (Abronia umbellata)		Native	At least some invasive/non-native	Aboveground	Unclear	Threatened pink sand verbena increased in incidence in 4/7 sites in response to habitat restoration, by up to 8.7-fold. In one site it decreased in abundance, and in the remainign two it was unchanged (and low). Unclear outcome because compared against another intervention (planting of beachgrass, which is also the historical baseline).	Visual surveys
Restoring aboveground carbon and biodiversity: a case study from the Nile basin, Ethiopia	INT-033-1	26a	Ecological restoration; restoration of degraded watersheds through exclosures Exclosures are areas closed off or protected from interference from people and domestic animals, with the goal of promoting natural regeneration of plants and reducing land degradation of formerly degraded communal grazing lands (Mekuria et al. 2011). In exclosures, grass harvesting (using a cut and carry system) is the…	Combination	Montane/Alpine	Other terrestrial	Ethiopia	Low income	Africa	No conflict declared	No		X				Detailed				Space for time				Sp ri	Diversity		Plants	Plants	Animals & plants		Trees & grasses & other plants	Climbers, shrubs, trees and other plants		Unclear	Unclear/partially unclear	Aboveground	Positive	9-32 plant species found within exclosures, compared to four plant species in control areas (communal grazing land). 'The increases in species richness with exclosure age is not linear, as 4-year-old exclosure displayed lower species richness when compared to the 3-year-old exclosure and the first two youngest exclosures displayed equal amounts of species richness.'	Visual surveys
Restoring aboveground carbon and biodiversity: a case study from the Nile basin, Ethiopia	INT-033-1	26b	Ecological restoration; restoration of degraded watersheds through exclosures Exclosures are areas closed off or protected from interference from people and domestic animals, with the goal of promoting natural regeneration of plants and reducing land degradation of formerly degraded communal grazing lands (Mekuria et al. 2011). In exclosures, grass harvesting (using a cut and carry system) is the…	Combination	Montane/Alpine	Other terrestrial	Ethiopia	Low income	Africa	No conflict declared	No		X				Detailed				Space for time				Fm+ ri	Diversity	Family richness	Plants	Plants	Animals & plants		Trees & grasses & other plants	Climbers, shrubs, trees and other plants		Unclear	Unclear/partially unclear	Aboveground	Positive	5-21 families recorded within exclosures, compared to just three families in control (communal grazing land).	Visual surveys
Restoring aboveground carbon and biodiversity: a case study from the Nile basin, Ethiopia	INT-033-1	26c	Ecological restoration; restoration of degraded watersheds through exclosures Exclosures are areas closed off or protected from interference from people and domestic animals, with the goal of promoting natural regeneration of plants and reducing land degradation of formerly degraded communal grazing lands (Mekuria et al. 2011). In exclosures, grass harvesting (using a cut and carry system) is the…	Combination	Montane/Alpine	Other terrestrial	Ethiopia	Low income	Africa	No conflict declared	No		X				Detailed				Space for time				Fun id	Ecosystem functioning and population dynamics	Richness of plant functional groups	Plants	Plants	Animals & plants		Trees & grasses & other plants	Climbers, shrubs, trees and other plants		Unclear	Unclear/partially unclear	Aboveground	Unclear	Exclosures contained more shrub, shrub/tree, and tree species than the communal grazing land (Table 4). The number of shrub/tree and tree species increased with exclosure duration. Except for the relatively oldest exclosures, shrub species dominate the species composition when compared to shrub/tree or tree species.'	Visual surveys
Restoring aboveground carbon and biodiversity: a case study from the Nile basin, Ethiopia	INT-033-1	26d	Ecological restoration; restoration of degraded watersheds through exclosures Exclosures are areas closed off or protected from interference from people and domestic animals, with the goal of promoting natural regeneration of plants and reducing land degradation of formerly degraded communal grazing lands (Mekuria et al. 2011). In exclosures, grass harvesting (using a cut and carry system) is the…	Combination	Montane/Alpine	Other terrestrial	Ethiopia	Low income	Africa	No conflict declared	No		X				Detailed				Space for time				Sp ev	Diversity	Sorensen's similarity index	Plants	Plants	Animals & plants		Trees & grasses & other plants	Climbers, shrubs, trees and other plants		Unclear	Unclear/partially unclear	Aboveground	Unclear	The similarity of vegetation [species] composition between an exclosure and the communal grazing land varied between 22.2% and 46.2% and decreased with exclosure age (Table 5). In addition, the similarity of vegetation composition between the oldest exclosure and the remaining exclosures displayed an increasing trend with exclosure age (Table)'.	Visual surveys
Restoring aboveground carbon and biodiversity: a case study from the Nile basin, Ethiopia	INT-033-1	26e	Ecological restoration; restoration of degraded watersheds through exclosures Exclosures are areas closed off or protected from interference from people and domestic animals, with the goal of promoting natural regeneration of plants and reducing land degradation of formerly degraded communal grazing lands (Mekuria et al. 2011). In exclosures, grass harvesting (using a cut and carry system) is the…	Combination	Montane/Alpine	Other terrestrial	Ethiopia	Low income	Africa	No conflict declared	No		X				Detailed				Space for time				Sp di	Diversity	Shannon diversity index (a.k.a. Shannon-Wiener diversity index)	Plants	Plants	Animals & plants		Trees & grasses & other plants	Climbers, shrubs, trees and other plants		Native	Unclear/partially unclear	Aboveground	Positive	Exclosures had higher species diversity than controls, and species diversity increased over time. 'Significant differences in species diversity between the oldest exclosure (i.e., 7 years), and communal grazing land (P D 0.01), 1- and 2-year-old observed (Figure 3). In addition, the 3- and 5-year-old exclosures (P D 0.004 and 0.03, respectively) were exclosures displayed significantly higher wood…	Visual surveys
Restoring aboveground carbon and biodiversity: a case study from the Nile basin, Ethiopia	INT-033-1	26f	Ecological restoration; restoration of degraded watersheds through exclosures Exclosures are areas closed off or protected from interference from people and domestic animals, with the goal of promoting natural regeneration of plants and reducing land degradation of formerly degraded communal grazing lands (Mekuria et al. 2011). In exclosures, grass harvesting (using a cut and carry system) is the…	Combination	Montane/Alpine	Other terrestrial	Ethiopia	Low income	Africa	No conflict declared	No		X				Detailed				Space for time				Sp ev	Diversity	Shannon-Wiener evenness index	Plants	Plants	Animals & plants		Trees & grasses & other plants	Climbers, shrubs, trees and other plants		Unclear	Unclear/partially unclear	Aboveground	No effect	Differences in woody species evenness between exclosures and grazing land as well as among the exclosures were not significant.	Visual surveys
Restoring aboveground carbon and biodiversity: a case study from the Nile basin, Ethiopia	INT-033-1	26g	Ecological restoration; restoration of degraded watersheds through exclosures Exclosures are areas closed off or protected from interference from people and domestic animals, with the goal of promoting natural regeneration of plants and reducing land degradation of formerly degraded communal grazing lands (Mekuria et al. 2011). In exclosures, grass harvesting (using a cut and carry system) is the…	Combination	Montane/Alpine	Other terrestrial	Ethiopia	Low income	Africa	No conflict declared	No		X				Detailed				Space for time				Biom	Biomass		Animals	Animals	Animals & plants		Trees & other plants	Two to seven dominant woody species per exclosure		Unclear	Unclear/partially unclear	Aboveground	Positive	Aboveground biomass and carbon increased following the establishment of exclosures on communal grazing land (Figure 4). However, the increases in aboveground biomass and carbon with exclosure age is not linear, as 2-year-old exclosure displayed lower values compared to the 1-year-old exclosure. In addition, the 5-year-old exclosure dis- played equivalent aboveground biomass and carbon com- pared …	Ex situ
Restoring aboveground carbon and biodiversity: a case study from the Nile basin, Ethiopia	INT-033-1	26h	Ecological restoration; restoration of degraded watersheds through exclosures Exclosures are areas closed off or protected from interference from people and domestic animals, with the goal of promoting natural regeneration of plants and reducing land degradation of formerly degraded communal grazing lands (Mekuria et al. 2011). In exclosures, grass harvesting (using a cut and carry system) is the…	Combination	Montane/Alpine	Other terrestrial	Ethiopia	Low income	Africa	No conflict declared	No			X			Detailed			X					Veg ext	Biomass	Vegetation cover	Plants	Plants	Animals & plants		Trees & grasses & other plants	Vegetation in general		Unclear	Unclear/partially unclear	Aboveground	Mixed	Surveys and interviews showed that local people perceived an increase in vegetation cover and rehabilitation of large gullies.' However, respondents also highlighted that 'aggravated soil and vegetation degradation in the remaining communal grazing lands due to increased grazing and human pressure.'	Qualitative primary data
The Ecological and Financial Impact of Soil Erosion and its Control - A Case Study from the Semiarid Northern Cape Province, South Africa	INT-038-1	27a	Combinatio of soil and water conservation methods on South African dryland: a) Construction of check dams across gullies - dams were made from geotextile hanging over wooden poles, weighed in place by rocks, and with brush placed on the upstream side to further calm the flow of water and promote filtration - the intended effect was to 'filter the run-off water, retaining most silt, seed and organ…	Restoration	Ecosystem not specified	Other terrestrial	South Africa	Upper middle income	Africa	No conflict declared	No		X				Detailed	X			Space for time				Veg dens	Biomass	Percentage cover	Plants	Plants	Plants & other		Grasses & other plants	Live and dead biotic material; standing and litter		Unclear	Unclear/partially unclear	Aboveground	Positive	Significantly higher total (live and dead; standing and litter) vegetation uplope of the check dams than in the control, but insignificantly higher than downslope plots. Also sig higher in restored bare patches than controls. The authors concluded that there was a 'relatively poor long-term response of plants to the bare-patch treatment' - during the dry period when treatment effects were assesse…	Visual surveys
The Ecological and Financial Impact of Soil Erosion and its Control - A Case Study from the Semiarid Northern Cape Province, South Africa	INT-038-1	27b	Combinatio of soil and water conservation methods on South African dryland: a) Construction of check dams across gullies - dams were made from geotextile hanging over wooden poles, weighed in place by rocks, and with brush placed on the upstream side to further calm the flow of water and promote filtration - the intended effect was to 'filter the run-off water, retaining most silt, seed and organ…	Restoration	Ecosystem not specified	Other terrestrial	South Africa	Upper middle income	Africa	No conflict declared	No		X				Detailed	X			Space for time				Veg dens	Biomass	Percentage cover	Plants	Plants	Plants & other		Grasses & other plants	Live grass, annual dicots, heraceous and woody perennials		Unclear	Unclear/partially unclear	Aboveground	Positive	Significantly higher live plant cover upslope of check dams than in the control, and insig higher than downslope. Thi held individually for grasses and annual dicots, but not perennial herbaceous dicots (which were insignificantly higher in upslope than both control and downslope). Insig higher in restored patches than controls, and very little difference between restored and controls for individ…	Visual surveys
The Ecological and Financial Impact of Soil Erosion and its Control - A Case Study from the Semiarid Northern Cape Province, South Africa	INT-038-1	27c	Combinatio of soil and water conservation methods on South African dryland: a) Construction of check dams across gullies - dams were made from geotextile hanging over wooden poles, weighed in place by rocks, and with brush placed on the upstream side to further calm the flow of water and promote filtration - the intended effect was to 'filter the run-off water, retaining most silt, seed and organ…	Restoration	Ecosystem not specified	Other terrestrial	South Africa	Upper middle income	Africa	No conflict declared	No		X				Detailed	X			Space for time				Veg dens	Biomass	Percentage cover	Plants	Plants	Plants & other		Grasses & other plants	Dead grass, annual dicots, heraceous and woody perennials		Unclear	Unclear/partially unclear	Aboveground	Positive	Insignificantly higher cover of dead plants overall upslope of the check dams than the control, and insig lower than (very similar to) downslope. However, dead grass and dead perennial herbaceous dicots were individually both sig higher upslope than the control, and insig lower than downslope. Also sig higher dead plant cover in the restored patches then controls, and sig higher for dead grass an…	Visual surveys
The Ecological and Financial Impact of Soil Erosion and its Control - A Case Study from the Semiarid Northern Cape Province, South Africa	INT-038-1	27d	Combinatio of soil and water conservation methods on South African dryland: a) Construction of check dams across gullies - dams were made from geotextile hanging over wooden poles, weighed in place by rocks, and with brush placed on the upstream side to further calm the flow of water and promote filtration - the intended effect was to 'filter the run-off water, retaining most silt, seed and organ…	Restoration	Ecosystem not specified	Other terrestrial	South Africa	Upper middle income	Africa	No conflict declared	No		X				Detailed	X			Space for time				Lit	Biomass	Percentage cover	Plants	Plants	Plants & other		Grasses & other plants	Litter (dead organic material covering the soil surface)		Unclear	Unclear/partially unclear	Aboveground	Positive	Insignificantly lower woody litter cover upslope of check dams than the control and downslope. Insignificantly lower woody litter and insig higher total litter in restored patches than controls.	Visual surveys
The Ecological and Financial Impact of Soil Erosion and its Control - A Case Study from the Semiarid Northern Cape Province, South Africa	INT-038-1	27e	Combinatio of soil and water conservation methods on South African dryland: a) Construction of check dams across gullies - dams were made from geotextile hanging over wooden poles, weighed in place by rocks, and with brush placed on the upstream side to further calm the flow of water and promote filtration - the intended effect was to 'filter the run-off water, retaining most silt, seed and organ…	Restoration	Ecosystem not specified	Other terrestrial	South Africa	Upper middle income	Africa	No conflict declared	No		X				Detailed	X			Space for time				Lit	Biomass	Abundance	NA	Microorganisms, fungi & other	Plants & other			Mammal droppings	X	Unclear	Unclear/partially unclear	Aboveground	Positive	Strong positive association between geotextile and occurrence of mammal droppings. Mammal droppings were used as an indicator of attractiveness of restored patches for wildlife.	Visual surveys
Post-Fire Seedling Recruitment and Morpho-Ecophysiological Responses to Induced Drought and Salvage Logging in Pinus halepensis Mill. Stands	INT-039-1	28a	Salvage logging (removal of dead standing trees) 6 months after a mid-high severity fire in serotinous pine forest.	Management	Temperate forests	Forest	Spain	High income	Europe	No conflict declared	No		X				Detailed				Space for time				Sp ab	Ecosystem composition	Seedling recruitment	Plants	Plants	Just plants		Trees & grasses & other plants	Aleppo pine (Pinus halepensis), Kermes oak (Quercus coccifera), and three selected species with different wildfire adaptation strategies; Resprouters: Stripa tenacissima (perennial grass); obligate seeders: Rosmarinus officinalis (rosemary; transient seed bank but not speciifc fire adaption, behaving like a post-fire coloniser of open insolated areas), Cistus clussi (germination of which is often…		Native	Native	Aboveground	No effect	Aleppo pine recruitment was very poor overall. However, there were insignificantly more pine seedlings in the control (no salvage logging after fire) (560 ± 100 seedlings ha−1) than in salvage logged area (280 ± 70 seedlings ha−1). A few Quercus coccifera individuals were found in the control, but none in the salvage logged area. The authors attribute the diminished 'vigor and growth of pine seed…	Visual surveys
Post-Fire Seedling Recruitment and Morpho-Ecophysiological Responses to Induced Drought and Salvage Logging in Pinus halepensis Mill. Stands	INT-039-1	28b	Salvage logging (removal of dead standing trees) 6 months after a mid-high severity fire in serotinous pine forest.	Management	Temperate forests	Forest	Spain	High income	Europe	No conflict declared	No		X				Detailed				Space for time				Sur r	Ecosystem functioning and population dynamics	Survival rate	Plants	Plants	Just plants		Trees & grasses & other plants	Aleppo pine (Pinus halepensis), Kermes oak (Quercus coccifera), and three selected species with different wildfire adaptation strategies; Resprouters: Stripa tenacissima (perennial grass); obligate seeders: Rosmarinus officinalis (rosemary; transient seed bank but not speciifc fire adaption, behaving like a post-fire coloniser of open insolated areas), Cistus clussi (germination of which is often…		Native	Native	Aboveground	Negative	Seedling survival ratio in control areas for Aleppo pine was <15%, compared to zero for areas with salvage logging.	Visual surveys
Post-Fire Seedling Recruitment and Morpho-Ecophysiological Responses to Induced Drought and Salvage Logging in Pinus halepensis Mill. Stands	INT-039-1	28c	Salvage logging (removal of dead standing trees) 6 months after a mid-high severity fire in serotinous pine forest.	Management	Temperate forests	Forest	Spain	High income	Europe	No conflict declared	No		X				Detailed				Space for time				Age str	Ecosystem functioning and population dynamics	Tree height	Plants	Plants	Just plants		Trees & grasses & other plants	Aleppo pine (Pinus halepensis), Kermes oak (Quercus coccifera), and three selected species with different wildfire adaptation strategies; Resprouters: Stripa tenacissima (perennial grass); obligate seeders: Rosmarinus officinalis (rosemary; transient seed bank but not speciifc fire adaption, behaving like a post-fire coloniser of open insolated areas), Cistus clussi (germination of which is often…		Native	Native	Aboveground	Negative	Pine seedlings growing in the control area were stat sig taller (44.0 ± 1.0 mm) than those in salvage logged area (39.5 ± 0.5 mm), two years after the intervention. The tallest individuals in the control areas were S. tenacissima, whereas in the salvage logged areas the tallest individuals were C. clussi.	Visual surveys
Post-Fire Seedling Recruitment and Morpho-Ecophysiological Responses to Induced Drought and Salvage Logging in Pinus halepensis Mill. Stands	INT-039-1	28d	Salvage logging (removal of dead standing trees) 6 months after a mid-high severity fire in serotinous pine forest.	Management	Temperate forests	Forest	Spain	High income	Europe	No conflict declared	No		X				Detailed				Space for time				Veg ext	Biomass	Vegetation cover	Plants	Plants	Just plants		Grasses & other plants	Three selected species with different wildfire adaptation strategies. Resprouters: Stripa tenacissima (perennial grass); obligate seeders: Rosmarinus officinalis (rosemary; transient seed bank but not speciifc fire adaption, behaving like a post-fire coloniser of open insolated areas), Cistus clussi (germination of which is often stimulated by fire). Maybe also tree species.		Native	Native	Aboveground	Negative	Cover for the resprouter S tenacissima was significantly higher than obligate seeder species, and was sig higher in the control sites than the salvage logged sites, 2 years after the intervention.	Visual surveys
Post-Fire Seedling Recruitment and Morpho-Ecophysiological Responses to Induced Drought and Salvage Logging in Pinus halepensis Mill. Stands	INT-039-1	28e	Salvage logging (removal of dead standing trees) 6 months after a mid-high severity fire in serotinous pine forest.	Management	Temperate forests	Forest	Spain	High income	Europe	No conflict declared	No		X				Detailed				Space for time				Gro	Ecosystem functioning and population dynamics	Vertical growth ratio	Plants	Plants	Just plants		Grasses & other plants	Three selected species with different wildfire adaptation strategies. Resprouters: Stripa tenacissima (perennial grass); obligate seeders: Rosmarinus officinalis (rosemary; transient seed bank but not speciifc fire adaption, behaving like a post-fire coloniser of open insolated areas), Cistus clussi (germination of which is often stimulated by fire). Maybe also tree species.		Native	Native	Aboveground	Negative	Relative growth in height ratio (ΔH; instataneous growth in height increment divided by plant height at the beginning of the increment) was higher in areas where salvage logging had not taken place, and was higher for resprouters than obligate seeder species. Salvage logged sites with enforced drought conditions had the lowest ΔH for obligate seeders. This held 2 years after the intervention had …	Visual surveys
Post-Fire Seedling Recruitment and Morpho-Ecophysiological Responses to Induced Drought and Salvage Logging in Pinus halepensis Mill. Stands	INT-039-1	28f	Salvage logging (removal of dead standing trees) 6 months after a mid-high severity fire in serotinous pine forest.	Management	Temperate forests	Forest	Spain	High income	Europe	No conflict declared	No		X				Detailed				Space for time				Gro	Ecosystem functioning and population dynamics	Vegetation cover increase ratio	Plants	Plants	Just plants		Grasses & other plants	Three selected species with different wildfire adaptation strategies. Resprouters: Stripa tenacissima (perennial grass); obligate seeders: Rosmarinus officinalis (rosemary; transient seed bank but not speciifc fire adaption, behaving like a post-fire coloniser of open insolated areas), Cistus clussi (germination of which is often stimulated by fire). Maybe also tree species.		Native	Native	Aboveground	Negative	Coverage ratio (ΔCOV; the instataneous change in plant surface increment divided by the total surface at the beginning) was higher in areas without salvage logging, and was higher for resprouters than obligate seeder species. ΔCOV was lowest for obligate seeders in salvage logged areas with enforced drought. This was stat significant in a model, and held for 2 years after the intervention.	Visual surveys
Benefits Derived From Rehabilitating A Degraded Semi-arid Rangeland In Communal Enclosures, Kenya	INT-078-1	29a	Rangeland rehabilitation through livestock enclosures to permit revegetation of rangeland. 40 enclosure owners were sampled, with enclosures up to 30 years old. Rehabilitation involved 'revegetation through ripping and grass reseeding'. The first category is the reseeded, communally owned, and communally managed enclosure. 'This belongs to the community and is managed by a community group with ba…	Combination	Tropical and subtropical grasslands	Other terrestrial	Kenya	Lower middle income	Africa	No conflict declared	No			X			Detailed	X							Veg dens	Biomass	Vegetation cover	Plants	Plants	Just plants		Trees & grasses & other plants	Stepp-like vegetation, dominated by grasslands with scattered native and exotic tree species		Mixed	At least some invasive/non-native	Aboveground	Positive	Individuals indicated in semi-sturctured interviews, key informant interviews and focus group discussions 'vegetation cover has greatly increased compared to other neighbouring areas without enclosures.'	Qualitative primary data
Facilitation shifts paradigms and can amplify coastal restoration efforts	INT-081-1	30a	Salt marsh restoration based on two different designs of planting transplants: (1) In 'clumped treatments', nine transplant plugs were planted in the middle of each plot so that all plugs were touching. (2) In 'dispersed treatments', nine plugs were planted at equal distances from each other (50 cm in all directions). Transplant plugs were 10 x 10 x 10 cm and consisted of the dominant marsh grass…	Restoration	Saltmarsh	Other terrestrial	United States of America	High income	North America	No conflict declared	Yes	Field experiment implemented by author(s)	X				Detailed			X			X		Sur r	Ecosystem functioning and population dynamics	Survival rate	Plants	Plants	Just plants		Grasses	Dominant marsh grass Spartina alterniflora in Florida, obtained from Tampa Bay Watch, and Spartina anglica in Baarland, obtained on-site.		Native	Native	Aboveground	Positive	Average survivorship of transplanted plugs was higher when the plugs were clumped rather than dispersed. In Florida, at low elevations, 'average survi- vorship in dispersed treatments was 58%, and increased to 100% in clumped treatments, whereas at high elevations average survi- vorship in dispersed treatments was 84%, and increased to 100% in clumped treatments.' In The Netherlands, at low eleva…	Visual surveys
Facilitation shifts paradigms and can amplify coastal restoration efforts	INT-081-1	30b	Salt marsh restoration based on two different designs of planting transplants: (1) In 'clumped treatments', nine transplant plugs were planted in the middle of each plot so that all plugs were touching. (2) In 'dispersed treatments', nine plugs were planted at equal distances from each other (50 cm in all directions). Transplant plugs were 10 x 10 x 10 cm and consisted of the dominant marsh grass…	Restoration	Saltmarsh	Other terrestrial	United States of America	High income	North America	No conflict declared	Yes	Field experiment implemented by author(s)	X				Detailed			X			X		Biom	Biomass	Aboveground biomass	Plants	Plants	Just plants		Grasses	Dominant marsh grass Spartina alterniflora in Florida, obtained from Tampa Bay Watch, and Spartina anglica in Baarland, obtained on-site.		Native	Native	Aboveground	Positive	Aboveground biomass was almost 200% higher when transplanted plugs were clumped rather than dispersed.	Visual surveys
Facilitation shifts paradigms and can amplify coastal restoration efforts	INT-081-1	30c	Salt marsh restoration based on two different designs of planting transplants: (1) In 'clumped treatments', nine transplant plugs were planted in the middle of each plot so that all plugs were touching. (2) In 'dispersed treatments', nine plugs were planted at equal distances from each other (50 cm in all directions). Transplant plugs were 10 x 10 x 10 cm and consisted of the dominant marsh grass…	Restoration	Saltmarsh	Other terrestrial	United States of America	High income	North America	No conflict declared	Yes	Field experiment implemented by author(s)	X				Detailed			X			X		Stem dens	Biomass	Stem density	Plants	Plants	Just plants		Grasses	Dominant marsh grass Spartina alterniflora in Florida, obtained from Tampa Bay Watch, and Spartina anglica in Baarland, obtained on-site.		Native	Native	Aboveground	Positive	Stem density was 80% higher when transplanted plugs were clumped rather than dispersed. Stem density included all stems in original planting and emergent runners, making it a measure of clump expansion.	Visual surveys
Facilitation shifts paradigms and can amplify coastal restoration efforts	INT-081-1	30d	Salt marsh restoration based on two different designs of planting transplants: (1) In 'clumped treatments', nine transplant plugs were planted in the middle of each plot so that all plugs were touching. (2) In 'dispersed treatments', nine plugs were planted at equal distances from each other (50 cm in all directions). Transplant plugs were 10 x 10 x 10 cm and consisted of the dominant marsh grass…	Restoration	Saltmarsh	Other terrestrial	United States of America	High income	North America	No conflict declared	Yes	Field experiment implemented by author(s)	X				Detailed			X			X		Repr	Ecosystem functioning and population dynamics	Runner length	Plants	Plants	Just plants		Grasses	Dominant marsh grass Spartina alterniflora in Florida, obtained from Tampa Bay Watch, and Spartina anglica in Baarland, obtained on-site.		Native	Native	Aboveground	Positive	Maximal runner length was 143% higher when transplanted plugs were clumped rather than dispersed. Runner length reflects dispersal potential.	Visual surveys
Low-cost grass restoration using erosion barriers in a degraded African rangeland	INT-087-1	31a	Restoration of degraded rangeland using five different types of erosion barriers, either: (1) trenches with small berms; (2) bundles of branches; and bundles of branches with (3) elephant dung balls, (4) burlap sacking, or (5) nylon mesh sacking inside them. The authors also tested whether barrier performance depended on (1) supplemental seeding with the grass Cenchrus ciliaris and (2) whether a …	Restoration	Tropical and subtropical grasslands	Other terrestrial	Kenya	Lower middle income	Africa	No conflict declared	Yes	Field experiment implemented by author(s)	X				Detailed				No-intervention control based on personal observation alone (authors stated that bare areas of hard clay persist without intervention, from 10 years of field experience at this site)		X		Veg dens	Biomass	Percentage cover	Plants	Plants	Just plants		Trees & grasses & other plants	Woody vegetation is dominated by Acacia species (Fabaceae) A. etbaica, A. brevispica,and A. mellifera, along with the shrubs Croton dichogamous (Euphorbiaceae), Grewia spp. (Malvaceae), and Rhus vulgaris (Anacardiaceae).' 'The landscape is a heterogeneous mosaic ofbare soil, trees, and grasses, dominated by Eragrostis tenuifolia (Wiry lovegrass), Aristida kenyensis (Poaceae), and Cynodon dactylon…		Mixed	At least some invasive/non-native	Aboveground	Positive	All five barrier typres were successful at promoting plant establishment - ~3 years after barrier establishement, 'all five barrier types had successfully created sizable patches of new vegetation on their upslope sides'. 18 months after barrier establishement: percentage cover was highest in nylon mesh and trench barriers, followed by burlap, elephant dung, and then branches (nylon mesh had 79% …	Visual surveys
Low-cost grass restoration using erosion barriers in a degraded African rangeland	INT-087-1	31b	Restoration of degraded rangeland using five different types of erosion barriers, either: (1) trenches with small berms; (2) bundles of branches; and bundles of branches with (3) elephant dung balls, (4) burlap sacking, or (5) nylon mesh sacking inside them. The authors also tested whether barrier performance depended on (1) supplemental seeding with the grass Cenchrus ciliaris and (2) whether a …	Restoration	Tropical and subtropical grasslands	Other terrestrial	Kenya	Lower middle income	Africa	No conflict declared	Yes	Field experiment implemented by author(s)	X				Detailed				No-intervention control based on personal observation alone (authors stated that bare areas of hard clay persist without intervention, from 10 years of field experience at this site)		X		Veg ext	Biomass	Vegetated patch size	Plants	Plants	Just plants		Trees & grasses & other plants	Woody vegetation is dominated by Acacia species (Fabaceae) A. etbaica, A. brevispica,and A. mellifera, along with the shrubs Croton dichogamous (Euphorbiaceae), Grewia spp. (Malvaceae), and Rhus vulgaris (Anacardiaceae).' 'The landscape is a heterogeneous mosaic ofbare soil, trees, and grasses, dominated by Eragrostis tenuifolia (Wiry lovegrass), Aristida kenyensis (Poaceae), and Cynodon dactylon…		Mixed	At least some invasive/non-native	Aboveground	Positive	~3 years after barrier establishement, patches of vegetation had established upslope of all barrier types; 'the trench barrier type was the most successful, creating new vegetation patches averaging 10.6m2, compared to only 3.9m2 for the branches-only barriers.' 'Both seeding with Cenchrus and being adjacent to an existing vegetation patch also resulted in a greater area of new vegetation. Seeded…	Visual surveys
Low-cost grass restoration using erosion barriers in a degraded African rangeland	INT-087-1	31c	Restoration of degraded rangeland using five different types of erosion barriers, either: (1) trenches with small berms; (2) bundles of branches; and bundles of branches with (3) elephant dung balls, (4) burlap sacking, or (5) nylon mesh sacking inside them. The authors also tested whether barrier performance depended on (1) supplemental seeding with the grass Cenchrus ciliaris and (2) whether a …	Restoration	Tropical and subtropical grasslands	Other terrestrial	Kenya	Lower middle income	Africa	No conflict declared	Yes	Field experiment implemented by author(s)	X				Detailed				No-intervention control based on personal observation alone (authors stated that bare areas of hard clay persist without intervention, from 10 years of field experience at this site)		X		Sp ri	Diversity		Plants	Plants	Just plants		Trees & grasses & other plants	Woody vegetation is dominated by Acacia species (Fabaceae) A. etbaica, A. brevispica,and A. mellifera, along with the shrubs Croton dichogamous (Euphorbiaceae), Grewia spp. (Malvaceae), and Rhus vulgaris (Anacardiaceae).' 'The landscape is a heterogeneous mosaic ofbare soil, trees, and grasses, dominated by Eragrostis tenuifolia (Wiry lovegrass), Aristida kenyensis (Poaceae), and Cynodon dactylon…		Mixed	At least some invasive/non-native	Aboveground	Positive	Authors infer that species richness was increased by all barrier types compared to having no barrier. Species richness was highest for trench barriers, followed by nylon mesh. Trench barrier richness was stat significantly higher than all other barriers except for nylon mesh. Seeding with Cenchrus did not effect species richness.	Visual surveys
Low-cost grass restoration using erosion barriers in a degraded African rangeland	INT-087-1	31d	Restoration of degraded rangeland using five different types of erosion barriers, either: (1) trenches with small berms; (2) bundles of branches; and bundles of branches with (3) elephant dung balls, (4) burlap sacking, or (5) nylon mesh sacking inside them. The authors also tested whether barrier performance depended on (1) supplemental seeding with the grass Cenchrus ciliaris and (2) whether a …	Restoration	Tropical and subtropical grasslands	Other terrestrial	Kenya	Lower middle income	Africa	No conflict declared	Yes	Field experiment implemented by author(s)	X				Detailed				No-intervention control based on personal observation alone (authors stated that bare areas of hard clay persist without intervention, from 10 years of field experience at this site)		X		Fun id	Ecosystem functioning and population dynamics	Functional composition	Plants	Plants	Just plants		Trees & grasses & other plants	Woody vegetation is dominated by Acacia species (Fabaceae) A. etbaica, A. brevispica,and A. mellifera, along with the shrubs Croton dichogamous (Euphorbiaceae), Grewia spp. (Malvaceae), and Rhus vulgaris (Anacardiaceae).' 'The landscape is a heterogeneous mosaic ofbare soil, trees, and grasses, dominated by Eragrostis tenuifolia (Wiry lovegrass), Aristida kenyensis (Poaceae), and Cynodon dactylon…		Mixed	At least some invasive/non-native	Aboveground	Unclear	There was a stat significant effect of barrier type on forb pin hits, 'primarily driven by higher total forb hits in the trench and nylon mesh treatment than other treatments'. 'Conversely, trenches had 15–20% fewer grass pin hits than other treatments, and nylon mesh barriers had the most grass pin hits'. 'Nylon mesh barriers had 16–26% more pin hits of perennials than the other treatments and 3…	Visual surveys
Assisted migration to address climate change: Recommendations for aspen reforestation in western Canada	INT-234-1	32a	Assisted migration of Aspen trees in western Canada (to eastern Rocky Mountain foothills) to detect adaptational lag of populations, identify populations vulerable to climate change, and target assisted mgiration to aid tree growth and survival. The effects of assisted migration were tested in reciprocal transplant experiments: seedlings of 38 provenances wee planted at all 5 test locations, in a…	Management	Temperate forests	Forest	Canada	High income	North America	No conflict declared	Yes	Field experiment implemented by author(s)	X				Detailed	X							Age str	Ecosystem functioning and population dynamics	Tree height	Plants	Plants	Just plants		Trees	Aspen (Populus tremuloides Michaux.)		Native assisted migrant	Native	Aboveground	Positive	Smaller positive effects associated with a high probability include transfers from the Boreal Plains to the Foothills' --> all transfers don't produce positive results (some perform worse than the local provenance) but what matters is one of the transfers was positive and therefore the intervention could be effective at this site if the correct provenance is chosen (in this case, those from the b…	Remote sensing
Assisted migration to address climate change: Recommendations for aspen reforestation in western Canada	INT-234-2	32.1a	Assisted migration of Aspen trees in western Canada (the southern boreal plains of Alberta) to detect adaptational lag of populations, identify populations vulerable to climate change, and target assisted mgiration to aid tree growth and survival. The effects of assisted migration were tested in reciprocal transplant experiments: seedlings of 38 provenances wee planted at all 5 test locations, in…	Management	Boreal forests and taiga	Forest	Canada	High income	North America	No conflict declared	Yes	Field experiment implemented by author(s)	X				Detailed	X							Age str	Ecosystem functioning and population dynamics	Tree height	Plants	Plants	Just plants		Trees	Aspen (Populus tremuloides Michaux.)		Native assisted migrant	Native	Aboveground	Positive	Smaller positive effects associated with a high probability include ... and transfers from Saskatchewan to Alberta.' --> all transfers don't produce positive results (some perform worse than the local provenance) but what matters is one of the transfers was positive and therefore the intervention could be effective at this site if the correct provenance is chosen (in this case, those from the sas…	Remote sensing
Assisted migration to address climate change: Recommendations for aspen reforestation in western Canada	INT-234-3	32.2a	Assisted migration of Aspen trees in western Canada (to Taiga plains of British Columbia) to detect adaptational lag of populations, identify populations vulerable to climate change, and target assisted mgiration to aid tree growth and survival. The effects of assisted migration were tested in reciprocal transplant experiments: seedlings of 38 provenances wee planted at all 5 test locations, in a…	Management	Boreal forests and taiga	Forest	Canada	High income	North America	No conflict declared	Yes	Field experiment implemented by author(s)	X				Detailed	X							Age str	Ecosystem functioning and population dynamics	Tree height	Plants	Plants	Just plants		Trees	Aspen (Populus tremuloides Michaux.)		Native assisted migrant	Native	Aboveground	Positive	The probabilities of matching or increasing productivity relative to local sources are very pronounced for movement to and from the most northern region (Taiga, Site 70), with northward transfer very likely to be beneficial and southward movements certain to be disadvantageous. --> provenances from all other sites out-performed the growth of the local taiga provenance effectiveness assessment: we…	Remote sensing
Assisted migration to address climate change: Recommendations for aspen reforestation in western Canada	INT-234-4	32.3a	Assisted migration of Aspen trees in western Canada (to southern boreal plains of Saskatchewan) to detect adaptational lag of populations, identify populations vulerable to climate change, and target assisted mgiration to aid tree growth and survival. The effects of assisted migration were tested in reciprocal transplant experiments: seedlings of 38 provenances wee planted at all 5 test locations…	Management	Boreal forests and taiga	Forest	Canada	High income	North America	No conflict declared	Yes	Field experiment implemented by author(s)	X				Detailed	X							Age str	Ecosystem functioning and population dynamics	Tree height	Plants	Plants	Just plants		Trees	Aspen (Populus tremuloides Michaux.)		Native assisted migrant	Native	Aboveground	Unclear	All other probability values are intermediate, indicating either a minor transfer effect size or uncertainty due to low sample sizes.' --> no conclusions made and perhaps limited because of sample size and therefore coded as 'unclear' effectiveness assessment: we calculated a matrix of probabilities that provenances transferred from different ecoregions (representing assisted migration) matched o…	Remote sensing
Assisted migration to address climate change: Recommendations for aspen reforestation in western Canada	INT-234-5	32.4a	Assisted migration of Aspen trees in western Canada (to northern boreal plains of alberta) to detect adaptational lag of populations, identify populations vulerable to climate change, and target assisted mgiration to aid tree growth and survival. The effects of assisted migration were tested in reciprocal transplant experiments: seedlings of 38 provenances wee planted at all 5 test locations, in …	Management	Boreal forests and taiga	Forest	Canada	High income	North America	No conflict declared	Yes	Field experiment implemented by author(s)	X				Detailed	X							Age str	Ecosystem functioning and population dynamics	Tree height	Plants	Plants	Just plants		Trees	Aspen (Populus tremuloides Michaux.)		Native assisted migrant	Native	Aboveground	Negative	Here, a southward transfer from the region is clearly disadvan- tageous, but a northward transfer to the region is unlikely to have a benefit. --> all translocations performed worse than the local provenance therefore negative effect effectiveness assessment: we calculated a matrix of probabilities that provenances transferred from different ecoregions (representing assisted migration) matched or…	Remote sensing
Effect of ecological restoration and climate change on ecosystems: a case study in the Three-Rivers Headwater Region, China	INT-229-1	33a	The Three-Rivers Headwater Region (TRHR) project for forest protection, restoration and creation, among other activities. The TRHR is a nature reserve on the Qinghai-Tibet Plateau, covering 39.5x10^4 km2. The state council implemented the the TRHR project for planning of eco-environment protection and contruction within the TRHR. This included 18 nature reserves, with a total area of 15.2x10^4 km…	Mixed created/non-created habitats	Created forest, Created grassland, Temperate forests, Temperate grasslands, Montane/Alpine, Wetlands	Terrestrial combination	China	Upper middle income	Asia + Pacific	No conflict declared	Unclear		X				Detailed			X					H qual	Habitat quality	Habitat quality index	Plants	Plants	Just plants		Trees & grasses & other plants	Forest, shrub, grassland, wetland/water-body, farmland, desert		Unclear	Unclear/partially unclear	Aboveground	Positive	Some counties that included nature reserves (e.g. Zhiduo, Guinan, and Maduo) had slightly higher quality habitat indexes in 2010 [5 years after initiation of the project] than in 2000, which reflected the effectiveness of ecological restoration ' 'Habitat quality is the potential for the ecosystem to provide the necessary conditions for the survival and reproduction of the species.' 'The distribu…	Remote & secon
Effect of ecological restoration and climate change on ecosystems: a case study in the Three-Rivers Headwater Region, China	INT-229-1	33b	The Three-Rivers Headwater Region (TRHR) project for forest protection, restoration and creation, among other activities. The TRHR is a nature reserve on the Qinghai-Tibet Plateau, covering 39.5x10^4 km2. The state council implemented the the TRHR project for planning of eco-environment protection and contruction within the TRHR. This included 18 nature reserves, with a total area of 15.2x10^4 km…	Mixed created/non-created habitats	Created forest, Created grassland, Temperate forests, Temperate grasslands, Montane/Alpine, Wetlands	Terrestrial combination	China	Upper middle income	Asia + Pacific	No conflict declared	Unclear		X				Detailed			X					Veg ext	Biomass	Vegetation area by type	Plants	Plants	Just plants		Trees & grasses & other plants	Forest, shrub, grassland, wetland/water-body, farmland, urban, desert, glacier and snow		Unclear	Unclear/partially unclear	Aboveground	Positive	Forest area didn't change between before and after the intervention, whereas grassland area increased by 158.8km2. Shrub, wetland/water-body area also increased slightly, as did urban area; however, farmland and desert area decreased. Grasslands and wetlands replaced some desert and farmland areas. All changes in area were of now more than 0.1%.	Remote & secon
Effect of ecological restoration and climate change on ecosystems: a case study in the Three-Rivers Headwater Region, China	INT-229-1	33c	The Three-Rivers Headwater Region (TRHR) project for forest protection, restoration and creation, among other activities. The TRHR is a nature reserve on the Qinghai-Tibet Plateau, covering 39.5x10^4 km2. The state council implemented the the TRHR project for planning of eco-environment protection and contruction within the TRHR. This included 18 nature reserves, with a total area of 15.2x10^4 km…	Mixed created/non-created habitats	Created forest, Created grassland, Temperate forests, Temperate grasslands, Montane/Alpine, Wetlands	Terrestrial combination	China	Upper middle income	Asia + Pacific	No conflict declared	Unclear		X				Detailed			X					Veg dens	Biomass	Vegetation density	Plants	Plants	Just plants		Trees & grasses & other plants	Forest, shrub, grassland, wetland/water-body, farmland, desert		Unclear	Unclear/partially unclear	Aboveground	Positive	From 5 years previous to 5 years after the project's initiation, there was 'an increase in vegetation cover for the forest, shrub, and grassland vegetation types, with the most significant increase for grasslands'. 'For each nature reserve, vegetation cover was 5 % more during 2005–2012 than during 2000–2004.' (The project started in 2005). However, overall vegetation cover had a decreasing trend…	Remote & secon
Effect of ecological restoration and climate change on ecosystems: a case study in the Three-Rivers Headwater Region, China	INT-229-1	33d	The Three-Rivers Headwater Region (TRHR) project for forest protection, restoration and creation, among other activities. The TRHR is a nature reserve on the Qinghai-Tibet Plateau, covering 39.5x10^4 km2. The state council implemented the the TRHR project for planning of eco-environment protection and contruction within the TRHR. This included 18 nature reserves, with a total area of 15.2x10^4 km…	Mixed created/non-created habitats	Created forest, Created grassland, Temperate forests, Temperate grasslands, Montane/Alpine, Wetlands	Terrestrial combination	China	Upper middle income	Asia + Pacific	No conflict declared	Unclear		X				Detailed			X					Frag	Landscape structure	Interspersion and Juxtaposition Index (IJI)	Plants	Plants	Just plants		Trees & grasses & other plants	Forest, shrub, grassland, wetland/water-body, farmland, desert		Unclear	Unclear/partially unclear	Aboveground	Unclear	Patch adjacency of various ecosystem patches in the TRHR (indicated by the IJI) increased from 2000 to 2010' (project was initiated in 2005). The authors don't clarify whether this is a positive, negative or neutral result for ecosystem health.	Remote & secon
Effect of ecological restoration and climate change on ecosystems: a case study in the Three-Rivers Headwater Region, China	INT-229-1	33e	The Three-Rivers Headwater Region (TRHR) project for forest protection, restoration and creation, among other activities. The TRHR is a nature reserve on the Qinghai-Tibet Plateau, covering 39.5x10^4 km2. The state council implemented the the TRHR project for planning of eco-environment protection and contruction within the TRHR. This included 18 nature reserves, with a total area of 15.2x10^4 km…	Mixed created/non-created habitats	Created forest, Created grassland, Temperate forests, Temperate grasslands, Montane/Alpine, Wetlands	Terrestrial combination	China	Upper middle income	Asia + Pacific	No conflict declared	Unclear		X				Detailed			X					Frag	Landscape structure	Contagion Index	Plants	Plants	Just plants		Trees & grasses & other plants	Forest, shrub, grassland, wetland/water-body, farmland, desert		Unclear	Unclear/partially unclear	Aboveground	Unclear	Decrease of contagion index (CONTAG) from 5 years prior to 5 years after the intervetnion - suggesting many small patches characterized by high dispersion and interspersion. This contasts with the simultaneous increase in patch adjacency (as shown by IJI). Together, these suggest that 'the ecosystem patches in the TRHR became more equally adjacent to each other and less spatially aggregated.' How…	Remote & secon
Effect of ecological restoration and climate change on ecosystems: a case study in the Three-Rivers Headwater Region, China	INT-229-1	33f	The Three-Rivers Headwater Region (TRHR) project for forest protection, restoration and creation, among other activities. The TRHR is a nature reserve on the Qinghai-Tibet Plateau, covering 39.5x10^4 km2. The state council implemented the the TRHR project for planning of eco-environment protection and contruction within the TRHR. This included 18 nature reserves, with a total area of 15.2x10^4 km…	Mixed created/non-created habitats	Created forest, Created grassland, Temperate forests, Temperate grasslands, Montane/Alpine, Wetlands	Terrestrial combination	China	Upper middle income	Asia + Pacific	No conflict declared	Unclear		X				Detailed			X					Hab di	Diversity	Shannon's Diversity Index (for land use patches in a landscape)	Plants	Plants	Just plants		Trees & grasses & other plants	Forest, shrub, grassland, wetland/water-body, farmland, desert		Unclear	Unclear/partially unclear	Aboveground	Positive	Shannon's Diversity Index of landscape patches increased, which combined with the increased in evenness, suggests an increase in landscape heterogeneity.	Remote & secon
Effect of ecological restoration and climate change on ecosystems: a case study in the Three-Rivers Headwater Region, China	INT-229-1	33g	The Three-Rivers Headwater Region (TRHR) project for forest protection, restoration and creation, among other activities. The TRHR is a nature reserve on the Qinghai-Tibet Plateau, covering 39.5x10^4 km2. The state council implemented the the TRHR project for planning of eco-environment protection and contruction within the TRHR. This included 18 nature reserves, with a total area of 15.2x10^4 km…	Mixed created/non-created habitats	Created forest, Created grassland, Temperate forests, Temperate grasslands, Montane/Alpine, Wetlands	Terrestrial combination	China	Upper middle income	Asia + Pacific	No conflict declared	Unclear		X				Detailed			X					Hab di	Diversity	Shannon's Evenness Index (for land use patches in a landscape)	Plants	Plants	Just plants		Trees & grasses & other plants	Forest, shrub, grassland, wetland/water-body, farmland, desert		Unclear	Unclear/partially unclear	Aboveground	Positive	Shannon's Evenness Index of landscape patches increased, which combined with an increase in diversity index suggests an increase in landscape heterogeneity.	Remote & secon
Development and testing of a sustainable environmental restoration policy on eradicating the poverty trap in China’s Changting County	INT-219-1	34a	Soil and water conservation project: a new development policy was tested starting in 2000, desgined to promote both environmnetal conservation and poverty reduction. 'The policy provided annual compensation of RMB 10 million (US$1 equaled approximately RMB 8.27 in 2000) from the province’s budget in areas that were experiencing the heaviest soil erosion.' 'Farmers received living subsidies that c…	Mixed created/non-created habitats	Created forest, Temperate forests	Forest	China	Upper middle income	Asia + Pacific	No conflict declared	Yes	Author(s) associated with intervention	X				Detailed	X		X					Sp ri	Diversity		Plants	Plants	Just plants		Grasses & other plants	Forest and other vegetation		Unclear	Unclear/partially unclear	Aboveground	Positive	Species richness (no. vegetation species per ha) increased stat significantly from 1999 to 2007 (policy started in 2000), whilst species richness increased insignificanly outside the project area over the same time period. The increase in species richness was significantly greater inside than outside the project area.	Visual surveys
Development and testing of a sustainable environmental restoration policy on eradicating the poverty trap in China’s Changting County	INT-219-1	34b	Soil and water conservation project: a new development policy was tested starting in 2000, desgined to promote both environmnetal conservation and poverty reduction. 'The policy provided annual compensation of RMB 10 million (US$1 equaled approximately RMB 8.27 in 2000) from the province’s budget in areas that were experiencing the heaviest soil erosion.' 'Farmers received living subsidies that c…	Mixed created/non-created habitats	Created forest, Temperate forests	Forest	China	Upper middle income	Asia + Pacific	No conflict declared	Yes	Author(s) associated with intervention	X				Detailed	X		X					Veg dens	Biomass	Percentage cover	Plants	Plants	Just plants		Grasses & other plants	Vegetation in general		Unclear	Unclear/partially unclear	Aboveground	Positive	Total vegetation percentage cover increased stat significantly from 1999 to 2007 (policy started in 2000), but increased insignificantly outside the project area over the same time period. The increase was sig greater inside than outside the project area.	Visual surveys
Development and testing of a sustainable environmental restoration policy on eradicating the poverty trap in China’s Changting County	INT-219-1	34c	Soil and water conservation project: a new development policy was tested starting in 2000, desgined to promote both environmnetal conservation and poverty reduction. 'The policy provided annual compensation of RMB 10 million (US$1 equaled approximately RMB 8.27 in 2000) from the province’s budget in areas that were experiencing the heaviest soil erosion.' 'Farmers received living subsidies that c…	Mixed created/non-created habitats	Created forest, Temperate forests	Forest	China	Upper middle income	Asia + Pacific	No conflict declared	Yes	Author(s) associated with intervention	X				Detailed	X		X					Veg dens	Biomass	Forest cover	Plants	Plants	Just plants		Grasses & other plants	Forest		Unclear	Unclear/partially unclear	Aboveground	Positive	Total forest percentage cover increased stat significantly from 1999 to 2007 (policy started in 2000), but increased insignificantly outside the project area over the same time period. The increase was sig greater inside than outside the project area.	Visual surveys
Influence of forest management systems on natural resource use and provision of ecosystem services in Tanzania	INT-093-1	35a	Traditional management - forests governed by informal practices with oversight by traditional leaders (mwanamijie) with social and religious norms influencing resource use behaviors. 'The mwanamijie restrict access to and use of traditional forests in an effort to protect the vegetation and water resources through a system of taboos, social capital, fees, ceremonies and local policing. The tradit…	Combination	Montane/Alpine, Streams, rivers, riparian	Terrestrial-aquatic/coastal combination	United Republic of Tanzania	Low income	Africa	No conflict declared	No			X			Detailed				Implied that traditional forest management changed the situation compared to places without such management.				Stem dens	Biomass	Protection and planting of trees	Plants	Plants	Just plants		Trees	Hillside and riparian regions covered in trees - woodland		Unclear	Unclear/partially unclear	Aboveground	Positive	Social and religious importance of TF [traditionally-managed forests] provides both greater protection of trees as well as greater replanting of tree species.' Management protects wildlife habitat and the forest itself. From a qualitative assessment involving e.g. focus group discussions and questionnaires.	Visual surveys
Influence of forest management systems on natural resource use and provision of ecosystem services in Tanzania	INT-093-1	35b	Traditional management - forests governed by informal practices with oversight by traditional leaders (mwanamijie) with social and religious norms influencing resource use behaviors. 'The mwanamijie restrict access to and use of traditional forests in an effort to protect the vegetation and water resources through a system of taboos, social capital, fees, ceremonies and local policing. The tradit…	Combination	Montane/Alpine, Streams, rivers, riparian	Terrestrial-aquatic/coastal combination	United Republic of Tanzania	Low income	Africa	No conflict declared	No		X				Detailed						X		Age str	Ecosystem functioning and population dynamics	DBH	Plants	Plants	Just plants		Trees	Hillside and riparian regions covered in trees - woodland		Unclear	Unclear/partially unclear	Aboveground	Unclear	Mean tree DBH was larger in the traditionally-managed than the government-managed forest.	Visual surveys
Influence of forest management systems on natural resource use and provision of ecosystem services in Tanzania	INT-093-1	35c	Traditional management - forests governed by informal practices with oversight by traditional leaders (mwanamijie) with social and religious norms influencing resource use behaviors. 'The mwanamijie restrict access to and use of traditional forests in an effort to protect the vegetation and water resources through a system of taboos, social capital, fees, ceremonies and local policing. The tradit…	Combination	Montane/Alpine, Streams, rivers, riparian	Terrestrial-aquatic/coastal combination	United Republic of Tanzania	Low income	Africa	No conflict declared	No		X				Detailed						X		Age str	Ecosystem functioning and population dynamics	Basal area	Plants	Plants	Just plants		Trees	Hillside and riparian regions covered in trees - woodland		Unclear	Unclear/partially unclear	Aboveground	Unclear	Basal area was nearly 50% greater in the traditionally-managed than the government-managed forest.	Visual surveys
Influence of forest management systems on natural resource use and provision of ecosystem services in Tanzania	INT-093-1	35d	Traditional management - forests governed by informal practices with oversight by traditional leaders (mwanamijie) with social and religious norms influencing resource use behaviors. 'The mwanamijie restrict access to and use of traditional forests in an effort to protect the vegetation and water resources through a system of taboos, social capital, fees, ceremonies and local policing. The tradit…	Combination	Montane/Alpine, Streams, rivers, riparian	Terrestrial-aquatic/coastal combination	United Republic of Tanzania	Low income	Africa	No conflict declared	No		X				Detailed						X		Age str	Ecosystem functioning and population dynamics	Tree size distribution	Plants	Plants	Just plants		Trees	Hillside and riparian regions covered in trees - woodland		Unclear	Unclear/partially unclear	Aboveground	Unclear	Tree size was evenly distributed in the traditionally-managed forest, with no sig differences in abundance between 10cm size classes or distribuion of relative abundances; this contrasts with the government-managed forest, which had sig differences in abundances and relative abundances (higher abundance of the two smallest classes). Authors suggest that this is indicative of a healthier forest: '…	Visual surveys
Influence of forest management systems on natural resource use and provision of ecosystem services in Tanzania	INT-093-1	35e	Traditional management - forests governed by informal practices with oversight by traditional leaders (mwanamijie) with social and religious norms influencing resource use behaviors. 'The mwanamijie restrict access to and use of traditional forests in an effort to protect the vegetation and water resources through a system of taboos, social capital, fees, ceremonies and local policing. The tradit…	Combination	Montane/Alpine, Streams, rivers, riparian	Terrestrial-aquatic/coastal combination	United Republic of Tanzania	Low income	Africa	No conflict declared	No		X				Detailed						X		Stem dens	Biomass	Stems (above DBH 3cm) per ha	Plants	Plants	Just plants		Trees	Hillside and riparian regions covered in trees - woodland		Unclear	Unclear/partially unclear	Aboveground	Unclear	Mean stem density was lower in the traditionally-managed forest than the government-managed forest.	Visual surveys
Mineral versus organic contribution to vertical accretion and elevation change in restored marshes (Ebro Delta, Spain)	INT-101-1	36a	Restoration of rice fields to marshes by adding freshwater from 2 different sources (riverine and rice field drainage)	Restoration	Saltmarsh	Other terrestrial	Spain	High income	Europe	No conflict declared	Yes	Field experiment implemented by author(s)	X				Detailed				Comparison to brackish natural marshes data from literature.		X		Accr	Ecosystem functioning and population dynamics	Vertical accretion rate	Plants	Plants	Just plants		Grasses & other plants	Helophytic marsh dominated by a Phragmites australis (Cav.) Steudel, Scirpus maritimus L. and Scirpus litoralis Schrad.		Unclear	Unclear/partially unclear	Aboveground	Positive	The experimentally restored marshes had higher overall mean values in both water type treatments of vertical accretion rate ... than brackish natural vertical accretion ... in the Ebro Delta.' They were 'also overall higher than in other brackish natural marshes...'. The authors suggest that 'experimentally restored marshes result on higher vertical accretion and elevation change rates than natur…	Visual surveys
Mineral versus organic contribution to vertical accretion and elevation change in restored marshes (Ebro Delta, Spain)	INT-101-1	36b	Restoration of rice fields to marshes by adding freshwater from 2 different sources (riverine and rice field drainage)	Restoration	Saltmarsh	Other terrestrial	Spain	High income	Europe	No conflict declared	Yes	Field experiment implemented by author(s)	X				Detailed				Comparison to brackish natural marshes data from literature.		X		Accr	Ecosystem functioning and population dynamics	Elevation change	Plants	Plants	Just plants		Grasses & other plants	Helophytic marsh dominated by a Phragmites australis (Cav.) Steudel, Scirpus maritimus L. and Scirpus litoralis Schrad.		Unclear	Unclear/partially unclear	Aboveground	Positive	The experimentally restored marshes had higher overall mean values in both water type treatments of ... elevation change ... than brackish natural ... elevamarshes in the Ebro Delta.' They were 'also overall higher than in other brackish natural marshes...'. The authors suggest that 'experimentally restored marshes result on higher vertical accretion and elevation change rates than natural marshe…	Visual surveys
Mineral versus organic contribution to vertical accretion and elevation change in restored marshes (Ebro Delta, Spain)	INT-101-1	36c	Restoration of rice fields to marshes by adding freshwater from 2 different sources (riverine and rice field drainage)	Restoration	Saltmarsh	Other terrestrial	Spain	High income	Europe	No conflict declared	Yes	Field experiment implemented by author(s)	X				Detailed					X	X		Biom	Biomass	Maximum aboveground biomass	Plants	Plants	Just plants		Grasses & other plants	Oligohaline marsh veg- etation dominated by S. maritimus L. and S. litoralis Schrad., with high colonization by the weed P. distichum as a consequence of the proximity of a rice field. P. distichum was the most significant contributor to maximum aboveground biomass.		Unclear	Unclear/partially unclear	Aboveground	Unclear	Maximum aboveground biomass (MAB) was stat 'significantly higher in blocks closer to the rice field due to P. distichum L colonization'. But there was no sig difference in MAB between water types (riverine irrigation water and rice field drainage water) or between water levels. MAB was used to estimate plant growth.	Visual surveys
Mineral versus organic contribution to vertical accretion and elevation change in restored marshes (Ebro Delta, Spain)	INT-101-1	36d	Restoration of rice fields to marshes by adding freshwater from 2 different sources (riverine and rice field drainage)	Restoration	Saltmarsh	Other terrestrial	Spain	High income	Europe	No conflict declared	Yes	Field experiment implemented by author(s)	X				Detailed					X	X		Biom	Biomass	Maximum belowground biomass	Plants	Plants	Just plants		Grasses & other plants	Oligohaline marsh veg- etation dominated by S. maritimus L. and S. litoralis Schrad., with high colonization by the weed P. distichum as a consequence of the proximity of a rice field. P. distichum was the most significant contributor to maximum aboveground biomass.		Unclear	Unclear/partially unclear	Soil	Unclear	Maximum belowground biomass (MBB) was stat 'significantly higher in blocks closer to the rice field due to P. distichum L colonization'. MBB 'responded negatively to higher water levels in DW [rice field drainage water] treatment' - in the DW teatement, 'MBB was significantly higher in the 10 cm water level than in the 30 cm water level (P = 0.014) and higher than the 20 cm water level but not si…	Visual surveys
Short-term effects of spring prescribed burning on the understory vegetation of a Pinus halepensis forest in Northeastern Spain	INT-103-1	37a	Springtime prescripted burning of understory (under a Pinus halepensis canopy).	Management	Mediterranean shrubs and Forests	Terrestrial combination	Spain	High income	Europe	No conflict declared	Yes	Author(s) associated with intervention & funding	X				Detailed			X					Sp ri	Diversity	Species richness - total, and disaggregated into functional group, post-fire regeneration strategy, and Raunkiaer life form.	Plants	Plants	Just plants		Trees & other plants	The pine forests' understory is composed of Querco-Lentiscetum ... macchia, dominated by P. lentiscus and Q. coccifera,and Rosmarino-Ericion ... shrublands, dominated by R. officinalis and Erica multiflora L., with the presence of Ulex parviflorus Pourr.'		Unclear	Unclear/partially unclear	Aboveground	Negative	Mean total species richness was lower 1 year after prescribed burning, but this change was not stat significant. The total no. of species across all plots decreased from 34 species prior to 25 after burning. This held when disaggregating by functional type (mean herbacous richness amd mean woody richness also decreased not sig) and by post-fire strategy (mean seeder richness and mean resprouter r…	Visual surveys
Short-term effects of spring prescribed burning on the understory vegetation of a Pinus halepensis forest in Northeastern Spain	INT-103-1	37b	Springtime prescripted burning of understory (under a Pinus halepensis canopy).	Management	Mediterranean shrubs and Forests	Terrestrial combination	Spain	High income	Europe	No conflict declared	Yes	Author(s) associated with intervention & funding	X				Detailed			X					Fun id	Ecosystem functioning and population dynamics	Plants disaggregated by functional group, post-fire regeneration strategy, and Raunkiaer life form.	Plants	Plants	Just plants		Trees & other plants	The pine forests' understory is composed of Querco-Lentiscetum ... macchia, dominated by P. lentiscus and Q. coccifera,and Rosmarino-Ericion ... shrublands, dominated by R. officinalis and Erica multiflora L., with the presence of Ulex parviflorus Pourr.'		Unclear	Unclear/partially unclear	Aboveground	Unclear	Raunkiaer life form: 'The biological spectrum ofthe community (i.e. distribution of the number of species per life form) was almost not altered by the treatment. Globally [across all plots], the Chamaephytes remained themost abundant life form, followed by the Nanophanerophytes and Hemicriptophytes, whereas the Therophytes were always the least abundant form (no Therophyte was observed among Burn…	Visual surveys
Short-term effects of spring prescribed burning on the understory vegetation of a Pinus halepensis forest in Northeastern Spain	INT-103-1	37c	Springtime prescripted burning of understory (under a Pinus halepensis canopy).	Management	Mediterranean shrubs and Forests	Terrestrial combination	Spain	High income	Europe	No conflict declared	Yes	Author(s) associated with intervention & funding	X				Detailed			X					Sp di	Diversity	Shannon diversity index (a.k.a. Shannon-Wiener diversity index)	Plants	Plants	Just plants		Trees & other plants	The pine forests' understory is composed of Querco-Lentiscetum ... macchia, dominated by P. lentiscus and Q. coccifera,and Rosmarino-Ericion ... shrublands, dominated by R. officinalis and Erica multiflora L., with the presence of Ulex parviflorus Pourr.'		Unclear	Unclear/partially unclear	Aboveground	No effect	The PB [presecribed burning] caused a decrease of the Shannon-Wiener diversity index (3.7 ± 0.3 in C and 2.7 ± 0.2 in B; t = 4.0948, p = 0.0547). The strong decrease of seeders undoubtedly contributed to that effect.' 'No seeder herbaceous species was observed after the treatment and seeder woody species decreased (33.3%). Among the 4 woody species apparently disappearing after the PB, all were s…	Visual surveys
Short-term effects of spring prescribed burning on the understory vegetation of a Pinus halepensis forest in Northeastern Spain	INT-103-1	37d	Springtime prescripted burning of understory (under a Pinus halepensis canopy).	Management	Mediterranean shrubs and Forests	Terrestrial combination	Spain	High income	Europe	No conflict declared	Yes	Author(s) associated with intervention & funding	X				Detailed			X					Sp ab	Ecosystem composition	Species abundance comparison	Plants	Plants	Just plants		Trees & other plants	The pine forests' understory is composed of Querco-Lentiscetum ... macchia, dominated by P. lentiscus and Q. coccifera,and Rosmarino-Ericion ... shrublands, dominated by R. officinalis and Erica multiflora L., with the presence of Ulex parviflorus Pourr.'		Unclear	Unclear/partially unclear	Aboveground	Unclear	Species frequencies changed considerably after prescribed burning. Specifically, a decrease in frequency of seeder shrub species. Increased abundance of resprouters relatie to seeders - thought to promote resilience of the plant community to fire. Also e.g. 'Control plots are characterized by large frequencies of several species whose presence appears to be strongly reduced by burning (R. officin…	Visual surveys
Short-term effects of spring prescribed burning on the understory vegetation of a Pinus halepensis forest in Northeastern Spain	INT-103-1	37e	Springtime prescripted burning of understory (under a Pinus halepensis canopy).	Management	Mediterranean shrubs and Forests	Terrestrial combination	Spain	High income	Europe	No conflict declared	Yes	Author(s) associated with intervention & funding	X				Detailed			X					Sp ev	Diversity	Sorensen's similarity index	Plants	Plants	Just plants		Trees & other plants	The pine forests' understory is composed of Querco-Lentiscetum ... macchia, dominated by P. lentiscus and Q. coccifera,and Rosmarino-Ericion ... shrublands, dominated by R. officinalis and Erica multiflora L., with the presence of Ulex parviflorus Pourr.'		Unclear	Unclear/partially unclear	Aboveground	No effect	Sørensen index reached 78%, reflecting a high similarity between the two communities [before and after prescribed burning] in relation to floristic composition. Indeed, 64% of the 36 identified species (i.e. 23 species) were present both before and after the PB [prescribed burning]'. 'No relevant changes were observed in the floristic composition'.	Visual surveys
Short-term effects of spring prescribed burning on the understory vegetation of a Pinus halepensis forest in Northeastern Spain	INT-103-1	37f	Springtime prescripted burning of understory (under a Pinus halepensis canopy).	Management	Mediterranean shrubs and Forests	Terrestrial combination	Spain	High income	Europe	No conflict declared	Yes	Author(s) associated with intervention & funding	X				Detailed			X					Sp ev	Diversity	Species composition comparison	Plants	Plants	Just plants		Trees & other plants	The pine forests' understory is composed of Querco-Lentiscetum ... macchia, dominated by P. lentiscus and Q. coccifera,and Rosmarino-Ericion ... shrublands, dominated by R. officinalis and Erica multiflora L., with the presence of Ulex parviflorus Pourr.'		Unclear	Unclear/partially unclear	Aboveground	Negative	Only 2 species were found exclusively in Burnt plots (Dorycnium hirsutum and Thymus piperella), whereas 11 species apparently disappeared with the treatment [burning]' '56% of the species found among the Control plots were in the 3 (C) [control] plots, while only 36% of the species found among the Burnt plots were present in the 3 (B) [burnt] plots'.	Visual surveys
Short-term effects of spring prescribed burning on the understory vegetation of a Pinus halepensis forest in Northeastern Spain	INT-103-1	37g	Springtime prescripted burning of understory (under a Pinus halepensis canopy).	Management	Mediterranean shrubs and Forests	Terrestrial combination	Spain	High income	Europe	No conflict declared	Yes	Author(s) associated with intervention & funding	X				Detailed			X					Biom	Biomass	Total shrub volume	Plants	Plants	Just plants		Trees & other plants	The pine forests' understory is composed of Querco-Lentiscetum ... macchia, dominated by P. lentiscus and Q. coccifera,and Rosmarino-Ericion ... shrublands, dominated by R. officinalis and Erica multiflora L., with the presence of Ulex parviflorus Pourr.'		Unclear	Unclear/partially unclear	Aboveground	Unclear	Total shrub volume was significantly smaller after the burning (1454 ±377m3/ha in C [control] and 797.8±171m3/ha in B [burnt]; t=5.3086, p=0.0318).' This could be a postiive effect in terms of reduced fuel load (but the response of the ecosystem to wildfire was not empirically tested).	Visual surveys
Short-term effects of spring prescribed burning on the understory vegetation of a Pinus halepensis forest in Northeastern Spain	INT-103-1	37h	Springtime prescripted burning of understory (under a Pinus halepensis canopy).	Management	Mediterranean shrubs and Forests	Terrestrial combination	Spain	High income	Europe	No conflict declared	Yes	Author(s) associated with intervention & funding	X				Detailed			X					Biom	Biomass	Living shrub volume	Plants	Plants	Just plants		Trees & other plants	The pine forests' understory is composed of Querco-Lentiscetum ... macchia, dominated by P. lentiscus and Q. coccifera,and Rosmarino-Ericion ... shrublands, dominated by R. officinalis and Erica multiflora L., with the presence of Ulex parviflorus Pourr.'		Unclear	Unclear/partially unclear	Aboveground	Unclear	Living shrub volume significantly decreased too (1429.6 ± 355.5 m3/ha in C and 605.5 ± 155.6 m3/ha in B; t = 6.7497, p = 0.02125)'. This could be positive due to reducing fuel load, or negative due to reducing the amount of living matter.	Visual surveys
Short-term effects of spring prescribed burning on the understory vegetation of a Pinus halepensis forest in Northeastern Spain	INT-103-1	37i	Springtime prescripted burning of understory (under a Pinus halepensis canopy).	Management	Mediterranean shrubs and Forests	Terrestrial combination	Spain	High income	Europe	No conflict declared	Yes	Author(s) associated with intervention & funding	X				Detailed			X					Biom	Biomass	Dead standing shrub volume	Plants	Plants	Just plants		Trees & other plants	The pine forests' understory is composed of Querco-Lentiscetum ... macchia, dominated by P. lentiscus and Q. coccifera,and Rosmarino-Ericion ... shrublands, dominated by R. officinalis and Erica multiflora L., with the presence of Ulex parviflorus Pourr.'		Unclear	Unclear/partially unclear	Aboveground	Negative	Dead standing shrub volume (i.e. dead shrub individuals and dead standing twigs) became near to 8 times larger (24.4 ± 22.9 m3/ha in C and 192.3 ± 31.1 m3/ha in B; t = −9.2969, p = 0.01137)'.	Visual surveys
Short-term effects of spring prescribed burning on the understory vegetation of a Pinus halepensis forest in Northeastern Spain	INT-103-1	37j	Springtime prescripted burning of understory (under a Pinus halepensis canopy).	Management	Mediterranean shrubs and Forests	Terrestrial combination	Spain	High income	Europe	No conflict declared	Yes	Author(s) associated with intervention & funding	X				Detailed			X					Biom	Biomass	Total shrub phytomass	Plants	Plants	Just plants		Trees & other plants	The pine forests' understory is composed of Querco-Lentiscetum ... macchia, dominated by P. lentiscus and Q. coccifera,and Rosmarino-Ericion ... shrublands, dominated by R. officinalis and Erica multiflora L., with the presence of Ulex parviflorus Pourr.'		Unclear	Unclear/partially unclear	Aboveground	Unclear	Total shrub phytomass significantly (by 49%) decreased after prescribed burning. This could be a postiive effect in terms of reduced fuel load (but the response of the ecosystem to wildfire was not empirically tested).	Visual surveys
Short-term effects of spring prescribed burning on the understory vegetation of a Pinus halepensis forest in Northeastern Spain	INT-103-1	37k	Springtime prescripted burning of understory (under a Pinus halepensis canopy).	Management	Mediterranean shrubs and Forests	Terrestrial combination	Spain	High income	Europe	No conflict declared	Yes	Author(s) associated with intervention & funding	X				Detailed			X					Biom	Biomass	Living shrub phytomass & disaggregated by species and fine/course phytomass	Plants	Plants	Just plants		Trees & other plants	The pine forests' understory is composed of Querco-Lentiscetum ... macchia, dominated by P. lentiscus and Q. coccifera,and Rosmarino-Ericion ... shrublands, dominated by R. officinalis and Erica multiflora L., with the presence of Ulex parviflorus Pourr.'		Unclear	Unclear/partially unclear	Aboveground	Unclear	[Aboveground] living shrub phytomass decreased significantly (by 61%) after prescribed burning. This could be a postiive effect in terms of reduced fuel load (but the response of the ecosystem to wildfire was not empirically tested). 'Fine living shrub phytomass was reduced by 60%'; 'coarse living shrub phytomass by 62%' - the latter was stat sig. Note: fine phytomass had a diameter <0.6cm, cours…	Visual surveys
Short-term effects of spring prescribed burning on the understory vegetation of a Pinus halepensis forest in Northeastern Spain	INT-103-1	37l	Springtime prescripted burning of understory (under a Pinus halepensis canopy).	Management	Mediterranean shrubs and Forests	Terrestrial combination	Spain	High income	Europe	No conflict declared	Yes	Author(s) associated with intervention & funding	X				Detailed			X					Biom	Biomass	Dead standing shrub phytomass	Plants	Plants	Just plants		Trees & other plants	The pine forests' understory is composed of Querco-Lentiscetum ... macchia, dominated by P. lentiscus and Q. coccifera,and Rosmarino-Ericion ... shrublands, dominated by R. officinalis and Erica multiflora L., with the presence of Ulex parviflorus Pourr.'		Unclear	Unclear/partially unclear	Aboveground	Negative	Dead standing shrub phytomass significantly increased in the short term ..., being >10 times larger in Burnt plots' 'It increased both for fine ... and coarse ... fractions, resulting in a non-significant decrease of the fine/coarse dead standing shrub phytomass ratio... . It is remarkable that U. parviflorus dead standing biomass was inexistent one year after the burning, while it reached 0.008 …	Visual surveys
Short-term effects of spring prescribed burning on the understory vegetation of a Pinus halepensis forest in Northeastern Spain	INT-103-1	37m	Springtime prescripted burning of understory (under a Pinus halepensis canopy).	Management	Mediterranean shrubs and Forests	Terrestrial combination	Spain	High income	Europe	No conflict declared	Yes	Author(s) associated with intervention & funding	X				Detailed			X					Age str	Ecosystem functioning and population dynamics	Shrub height	Plants	Plants	Just plants		Trees & other plants	The pine forests' understory is composed of Querco-Lentiscetum ... macchia, dominated by P. lentiscus and Q. coccifera,and Rosmarino-Ericion ... shrublands, dominated by R. officinalis and Erica multiflora L., with the presence of Ulex parviflorus Pourr.'		Unclear	Unclear/partially unclear	Aboveground	Unclear	Mean shrub height decreased by 51% after prescribed burns. Maximum height of P. lentiscus (the tallest shrub) decreased by 17% after prescribed burns. Maximum shrub height decreased in two of the three plots (by 26% and 24%), whereas it remained stable in the third plot. 'The treatment led to the disruption of vertical and horizontal fuel continuities and the strong reduction of understory fuel l…	Visual surveys
Short-term effects of spring prescribed burning on the understory vegetation of a Pinus halepensis forest in Northeastern Spain	INT-103-1	37n	Springtime prescripted burning of understory (under a Pinus halepensis canopy).	Management	Mediterranean shrubs and Forests	Terrestrial combination	Spain	High income	Europe	No conflict declared	Yes	Author(s) associated with intervention & funding	X				Detailed			X					Veg dens	Biomass	Percentage cover	Plants	Plants	Just plants		Trees & other plants	The pine forests' understory is composed of Querco-Lentiscetum ... macchia, dominated by P. lentiscus and Q. coccifera,and Rosmarino-Ericion ... shrublands, dominated by R. officinalis and Erica multiflora L., with the presence of Ulex parviflorus Pourr.'		Unclear	Unclear/partially unclear	Aboveground	Unclear	Mean shrub cover decreased by 59.3% after prescribed burns. Mean herbaceous cover decreased by 77.7% after prescribed burns. 'Probability of observing zero [shrub] values among the quadrats (i.e. quadrats with no shrub cover) strongly increased after burning (230%) and in all plots' However, for herbaceous cover, 'the probability of observing zero values among the quadrats only increased in one p…	Visual surveys
Climate Change Adaptation and Restoration of Western Trout Streams: Opportunities and Strategies	INT-107-1	38a	Maggie Creek Watershed Restoration Project to enhance 132 km of stream, 800 ha of riparian habitat, and 16,200 ha of upland watershed in the basin. Restoration actions included the removal of existing stressors, in this case, livestock overgrazing; degradation of stream, riparian, and wet meadow habitats; and reconnection of three tributaries to the mainstem river corridor by replacing culverts a…	Restoration	Streams, rivers, riparian	Coastal/marine/freshwater	United States of America	High income	North America	No conflict declared	Yes	Author(s) associated with intervention	X				Poor detail			X					H qual	Habitat quality	Habitat identity and other metrics to indicate habitat quality	Plants	Plants	Animals & plants		Other plants	Upland and riparian vegetation		Unclear	Unclear/partially unclear	Aboveground	Positive	Aerial photography showed 'replacement of upland vegetation with riparian vegetation at broad landscape scales'. The authors framed this as 'habitat improvements'. Beavers' 'success as ecosystem engineers is evident: wetlands created by beavers recolonizing Maggie Creek now provide high-quality habitat for fish and many species of wildlife, including waterfowl and other birds, muskrats, mule deer…	Remote sensing
Climate Change Adaptation and Restoration of Western Trout Streams: Opportunities and Strategies	INT-107-1	38b	Maggie Creek Watershed Restoration Project to enhance 132 km of stream, 800 ha of riparian habitat, and 16,200 ha of upland watershed in the basin. Restoration actions included the removal of existing stressors, in this case, livestock overgrazing; degradation of stream, riparian, and wet meadow habitats; and reconnection of three tributaries to the mainstem river corridor by replacing culverts a…	Restoration	Streams, rivers, riparian	Coastal/marine/freshwater	United States of America	High income	North America	No conflict declared	Yes	Author(s) associated with intervention	X				Poor detail			X					Sp ab	Ecosystem composition	Population size	Animals	Animals	Animals & plants	Mammalia, pisces		Beaver		Unclear	Unclear/partially unclear	Aboveground	Positive	The number of beaver increased dramatically' Number of fish captured in surveys increased from average of 25 before remediation (newly connected Beaver Creek) to 215 after.	Unclear
Climate Change Adaptation and Restoration of Western Trout Streams: Opportunities and Strategies	INT-107-1	38c	Maggie Creek Watershed Restoration Project to enhance 132 km of stream, 800 ha of riparian habitat, and 16,200 ha of upland watershed in the basin. Restoration actions included the removal of existing stressors, in this case, livestock overgrazing; degradation of stream, riparian, and wet meadow habitats; and reconnection of three tributaries to the mainstem river corridor by replacing culverts a…	Restoration	Streams, rivers, riparian	Coastal/marine/freshwater	United States of America	High income	North America	No conflict declared	Yes	Author(s) associated with intervention	X				Poor detail			X					Tax pre	Ecosystem composition	Presence of animal species	Animals	Animals	Animals & plants	Aves, mammalia, pisces		Waterfowl and other birds, muskrats, mule deer, mink, and raccoons, Yellowstone Cutthroat Trout and other fish.		Unclear	Unclear/partially unclear	Aboveground & aquatic	Positive	Wetlands created by beavers recolonizing Maggie Creek now provide high-quality habitat for fish and many species of wildlife, including waterfowl and other birds, muskrats, mule deer, mink, and raccoons.'	Unclear
Climate Change Adaptation and Restoration of Western Trout Streams: Opportunities and Strategies	INT-107-1	38d	Maggie Creek Watershed Restoration Project to enhance 132 km of stream, 800 ha of riparian habitat, and 16,200 ha of upland watershed in the basin. Restoration actions included the removal of existing stressors, in this case, livestock overgrazing; degradation of stream, riparian, and wet meadow habitats; and reconnection of three tributaries to the mainstem river corridor by replacing culverts a…	Restoration	Streams, rivers, riparian	Coastal/marine/freshwater	United States of America	High income	North America	No conflict declared	Yes	Author(s) associated with intervention	X				Poor detail			X					Repr	Ecosystem functioning and population dynamics	Young-of-year fish numbers	Animals	Animals	Animals & plants	Pisces		Yellowstone Cutthroat Trout		Native	Unclear/partially unclear	Aquatic	Positive	Increasing evidence of successful spawning as indicated by the numbers of young-of-year fish'	Visual surveys
Climate Change Adaptation and Restoration of Western Trout Streams: Opportunities and Strategies	INT-107-1	38e	Maggie Creek Watershed Restoration Project to enhance 132 km of stream, 800 ha of riparian habitat, and 16,200 ha of upland watershed in the basin. Restoration actions included the removal of existing stressors, in this case, livestock overgrazing; degradation of stream, riparian, and wet meadow habitats; and reconnection of three tributaries to the mainstem river corridor by replacing culverts a…	Restoration	Streams, rivers, riparian	Coastal/marine/freshwater	United States of America	High income	North America	No conflict declared	Yes	Author(s) associated with intervention	X				Poor detail			X					Age str	Ecosystem functioning and population dynamics	Fish size	Animals	Animals	Animals & plants	Pisces		Yellowstone Cutthroat Trout		Native	Unclear/partially unclear	Aquatic	Positive	Larger, migratory-sized fish are also more common. Prior to culvert replacement, nearly all fish collected were less than 100 mm total length, but after fish passage was restored, LCT [trout] in the 200–300 mm total length class were collected. These improvements held true even in 2012, one of the worst drought years recorded. All of this suggests both that populations within each stream are bene…	Visual surveys
Climate Change Adaptation and Restoration of Western Trout Streams: Opportunities and Strategies	INT-107-2	38.1a	Reconstruction of the historic Crow Creek channel and restoration of the natural hydrologic processes that had been interrupted when the channel was straightened.	Restoration	Streams, rivers, riparian	Coastal/marine/freshwater	United States of America	High income	North America	No conflict declared	Yes	Author(s) associated with intervention	X				Poor detail			X					Sp ab	Ecosystem composition	Population size	Animals	Animals	Animals, plants & other	Pisces		Yellowstone Cutthroat Tr		Native	Unclear/partially unclear	Aquatic	Unclear	When study was written, trout populations were still being monitored, and it was expected that 'fish numbers will increase in the project reach within a few years'.	Visual surveys
Climate Change Adaptation and Restoration of Western Trout Streams: Opportunities and Strategies	INT-107-2	38.1b	Reconstruction of the historic Crow Creek channel and restoration of the natural hydrologic processes that had been interrupted when the channel was straightened.	Restoration	Streams, rivers, riparian	Coastal/marine/freshwater	United States of America	High income	North America	No conflict declared	Yes	Author(s) associated with intervention	X				Poor detail			X					H qual	Habitat quality	Habitat identity and other metrics to indicate habitat quality	Plants & NA	Plants, animals, & other	Animals, plants & other			Wetland and riparian vegetation, and streams	X	Unclear	Unclear/partially unclear	Aquatic	Positive	Wetland and riparian vegetation expected to be promoted by the slower stream velocity and reduced streambank erosion. Increased length (or perhaps area - unclear) of pools and associated tail outs (preferred spawning habitat) by nearly 10x. Suggests improved reproductive suscccess and 'resiliency to environmental disturbances in both Crow Creek hydrologic systems and the native YCT [trout] popula…	Remote sensing
Climate Change Adaptation and Restoration of Western Trout Streams: Opportunities and Strategies	INT-107-2	38.1c	Reconstruction of the historic Crow Creek channel and restoration of the natural hydrologic processes that had been interrupted when the channel was straightened.	Restoration	Streams, rivers, riparian	Coastal/marine/freshwater	United States of America	High income	North America	No conflict declared	Yes	Author(s) associated with intervention	X				Poor detail			X					Veg ext	Biomass	Stream length	NA	Microorganisms, fungi & other	Animals, plants & other			Waterways	X	NA	Unclear/partially unclear	Aquatic	Positive	Stream nearly doubled in length through the project reach.	Unclear
Climate Change Adaptation and Restoration of Western Trout Streams: Opportunities and Strategies	INT-107-3	38.2a	A variety of restoration actions were undertaken, including livestock exclusions with other long-term improvements to grazing management, channel reconstruction and reconnection of the creek to its floodplain, screening of two critical ditches, and restoration of minimum flows in the lower creek in late summer.	Restoration	Streams, rivers, riparian	Coastal/marine/freshwater	United States of America	High income	North America	No conflict declared	Yes	Author(s) associated with intervention	X				Poor detail			X					Sp ab	Ecosystem composition	Population size	Animals	Animals	Just animals	Pisces		Cuttroat Trout		Native	Native	Aquatic	Positive	Cutthroat Trout populations below the diversions went from zero in 2003 to an average of 30.4 fish/100 m in 2007–2012. Downstream areas that were inhabited by small numbers of Brown Trout but no Cutthroat Trout prior to the project in 2000 showed upwards of 81 Cutthroat Trout/100 m by 2010.'	Visual surveys
Climate Change Adaptation and Restoration of Western Trout Streams: Opportunities and Strategies	INT-107-3	38.2b	A variety of restoration actions were undertaken, including livestock exclusions with other long-term improvements to grazing management, channel reconstruction and reconnection of the creek to its floodplain, screening of two critical ditches, and restoration of minimum flows in the lower creek in late summer.	Restoration	Streams, rivers, riparian	Coastal/marine/freshwater	United States of America	High income	North America	No conflict declared	Yes	Author(s) associated with intervention	X				Poor detail			X					Repr	Ecosystem functioning and population dynamics	Movement to spawning grounds	Animals	Animals	Just animals	Pisces		Cuttroat Trout		Native	Native	Aquatic	Positive	In 2012, the MDFWP radio-tagged 14 mature migratory Cutthroat Trout in Nevada Creek and tracked their movements over the course of the spring and summer. Of the 14, 10 migrat- ed up Wasson Creek past the irrigation diversions and spawned'	Remote sensing
Oyster Reefs as Natural Breakwaters Mitigate Shoreline Loss and Facilitate Fisheries	INT-109-1	39a	Constructed two subtidal breakwater oyster reefs: 'Each reef complex was comprised of three 5 m x 25 m rectangular-trapezoid sections ... Each section consisted of loose oyster shell, purchased from a local seafood processing plant, placed on a geo-textile fabric to prevent subsidence and secured by a plastic mesh covering (with 1 cm2 openings) that was anchored by rebar... The subtidal design of…	Restoration	Deltas and estuaries	Coastal/marine/freshwater	United States of America	High income	North America	No conflict declared	Yes	Field experiment implemented by author(s)	X				Detailed			X					Sp ab	Ecosystem composition	Individual density disaggregated by life stage	Animals	Animals	Just animals	Bivalvia		Eastern oyster (Crassostrea virginica)		Native	Unclear/partially unclear	Aquatic	Positive	The oyster reef at Point aux Pins was constructed in May 2007, and were first sampled in July. 'Densities of juvenile oysters continually increased [from July] until peaking at greater than 700 oysters/m2 in November 2007, but were much lower the following year with ranges between 50 and 150/m2 [stat sig] ... Adult oysters were found in highest densities during November 2007 and May 2008 sampling…	Visual surveys
Oyster Reefs as Natural Breakwaters Mitigate Shoreline Loss and Facilitate Fisheries	INT-109-1	39b	Constructed two subtidal breakwater oyster reefs: 'Each reef complex was comprised of three 5 m x 25 m rectangular-trapezoid sections ... Each section consisted of loose oyster shell, purchased from a local seafood processing plant, placed on a geo-textile fabric to prevent subsidence and secured by a plastic mesh covering (with 1 cm2 openings) that was anchored by rebar... The subtidal design of…	Restoration	Deltas and estuaries	Coastal/marine/freshwater	United States of America	High income	North America	No conflict declared	Yes	Field experiment implemented by author(s)	X				Detailed					X			Sur r	Ecosystem functioning and population dynamics	Mortality rate	Animals	Animals	Just animals	Bivalvia		Eastern oyster (Crassostrea virginica)		Native	Unclear/partially unclear	Aquatic	Unclear	At Point aux Pins, the highest mortality was a year and 5 months after reef construction, and 88% of dead oysters were juveniles. At Albama Port reefs, the first and highest mortality (~70 oysters/m2) was a year after reef construcion, with 80% of those dead being juveniles. The authors state that this was a high mortality, and attribute it either physical disturbance (e.g. wave energy), or most …	Visual surveys
Oyster Reefs as Natural Breakwaters Mitigate Shoreline Loss and Facilitate Fisheries	INT-109-1	39c	Constructed two subtidal breakwater oyster reefs: 'Each reef complex was comprised of three 5 m x 25 m rectangular-trapezoid sections ... Each section consisted of loose oyster shell, purchased from a local seafood processing plant, placed on a geo-textile fabric to prevent subsidence and secured by a plastic mesh covering (with 1 cm2 openings) that was anchored by rebar... The subtidal design of…	Restoration	Deltas and estuaries	Coastal/marine/freshwater	United States of America	High income	North America	No conflict declared	Yes	Field experiment implemented by author(s)	X				Detailed				Space for time				Sp ab	Ecosystem composition	Species abundance estimates	Animals	Animals	Just animals	Malacostraca, pisces		Demersal, reef-associated, pelagic and other fish, and decapods		Unclear	Unclear/partially unclear	Aquatic	Mixed	Overall, demersal fish species and decapod species tended to be more abundant near oyster reefs than at control sites; only one species was signfiicantly less abundant at oyster reef sites (finetooth shark). 'For 5 cm gillnet samples, six demersal species contributed ≥1% of the total catch ... Of those, only sand seatrout abundance was significantly enhanced by breakwater reefs ... Silver perch, …	Visual surveys
Oyster Reefs as Natural Breakwaters Mitigate Shoreline Loss and Facilitate Fisheries	INT-109-1	39d	Constructed two subtidal breakwater oyster reefs: 'Each reef complex was comprised of three 5 m x 25 m rectangular-trapezoid sections ... Each section consisted of loose oyster shell, purchased from a local seafood processing plant, placed on a geo-textile fabric to prevent subsidence and secured by a plastic mesh covering (with 1 cm2 openings) that was anchored by rebar... The subtidal design of…	Restoration	Deltas and estuaries	Coastal/marine/freshwater	United States of America	High income	North America	No conflict declared	Yes	Field experiment implemented by author(s)	X				Detailed				Space for time				Com c	Ecosystem composition	Multivariate permutational analysis of variance	Animals	Animals	Just animals	Invertebrata, pisces		Larger, smaller, and juvenile fishes, and mobile invertebrates		Unclear	Unclear/partially unclear	Aquatic	Unclear	There were no community-level differences between our [oyster] breakwater and control treatments with 5 cm [gillnet] captured fishes.' Although 'site and the site-treatment interaction were both significant factors'. Where treatment is oyster reef present or absent. However: 'The communities of larger fishes captured by 10 cm gillnets differed significantly by site, treatment and the interaction …	Visual surveys
Oyster Reefs as Natural Breakwaters Mitigate Shoreline Loss and Facilitate Fisheries	INT-109-1	39e	Constructed two subtidal breakwater oyster reefs: 'Each reef complex was comprised of three 5 m x 25 m rectangular-trapezoid sections ... Each section consisted of loose oyster shell, purchased from a local seafood processing plant, placed on a geo-textile fabric to prevent subsidence and secured by a plastic mesh covering (with 1 cm2 openings) that was anchored by rebar... The subtidal design of…	Restoration	Deltas and estuaries	Coastal/marine/freshwater	United States of America	High income	North America	No conflict declared	Yes	Field experiment implemented by author(s)	X				Detailed				Space for time				O	Ecosystem composition	Abundance of species groups	Animals	Animals	Just animals	Malacostraca, pisces		Fish and decapods		Unclear	Unclear/partially unclear	Aquatic	Mixed	Total abundance of fish caught with 5cm gillnets was higher near oyster reefs at Point auz Pins, but higher near *controls* at Alabama Port. Total abundance of fish caught with 10cm gillnet was higher next to oyster reefs than at controls. Abundance of demersal fishes caught with 10cm gillnets was higher near breakwater reefs; there was no difference with 5cm gillnets or seines. Decapod crustacea…	Visual surveys
Oyster Reefs as Natural Breakwaters Mitigate Shoreline Loss and Facilitate Fisheries	INT-109-1	39f	Constructed two subtidal breakwater oyster reefs: 'Each reef complex was comprised of three 5 m x 25 m rectangular-trapezoid sections ... Each section consisted of loose oyster shell, purchased from a local seafood processing plant, placed on a geo-textile fabric to prevent subsidence and secured by a plastic mesh covering (with 1 cm2 openings) that was anchored by rebar... The subtidal design of…	Restoration	Deltas and estuaries	Coastal/marine/freshwater	United States of America	High income	North America	No conflict declared	Yes	Field experiment implemented by author(s)	X				Detailed				Space for time				Sp ri	Diversity		Animals	Animals	Just animals	Pisces		Fish		Unclear	Unclear/partially unclear	Aquatic	Positive	Species richness of fish caught with 10cm gillnets was signficantly higher near reefs than at the control. There was no sig difference for 5cm gillnets or seines, however.	Visual surveys
The Potential for Created Oyster Shell Reefs as a Sustainable Shoreline Protection Strategy in Louisiana	INT-112-1	40a	Oyster reef restoration: 'a total of 17.5 m3 of shucked oyster shell (cultch material) was off-loaded at each cultched site, and an experimental reef (25 x 1.0 x 0.7 m) was constructed ... Reefs were built as close to the shoreline as possible. All reefs were placed within 5 m of the shoreline and were intertidal.' Note: clutch is the mass of stones, broken shells, and grit which forms an oyster …	Restoration	Deltas and estuaries	Coastal/marine/freshwater	United States of America	High income	North America	No conflict declared	Yes	Field experiment implemented by author(s)	X		X	M. La Peyre, B. Piazza, and P. Banks, unpublished data	Secondary data so NA				Space for time				Tax pre	Ecosystem composition	Shoreline use by the species - vague	Animals	Animals	Just animals	Nekton		Nektons (i.e. actively swimming organisms, as opposed to non-swimming aquatic organisms)		Unclear	Unclear/partially unclear	Aquatic	No effect	A potential concern of artificial reef systems placed near shore is their impact on nekton habitat and use, including shoreline (flooded marsh) accessibility. Placement of our fringing created reefs did not significantly alter nekton shoreline use [unclear if use refers to species abundance, presence, behaviours etc.] between clutched and noncultched sites (M. La Peyre, B. Piazza, and P. Banks, u…	Unclear
The Potential for Created Oyster Shell Reefs as a Sustainable Shoreline Protection Strategy in Louisiana	INT-112-1	40b	Oyster reef restoration: 'a total of 17.5 m3 of shucked oyster shell (cultch material) was off-loaded at each cultched site, and an experimental reef (25 x 1.0 x 0.7 m) was constructed ... Reefs were built as close to the shoreline as possible. All reefs were placed within 5 m of the shoreline and were intertidal.' Note: clutch is the mass of stones, broken shells, and grit which forms an oyster …	Restoration	Deltas and estuaries	Coastal/marine/freshwater	United States of America	High income	North America	No conflict declared	Yes	Field experiment implemented by author(s)	X				Detailed			X					Repr	Ecosystem functioning and population dynamics	Recruitment rate	Animals	Animals	Just animals	Bivalvia		Eastern oyster (Crassostrea virginica)		Native	Unclear/partially unclear	Aquatic	Positive	Recruitment of oysters began immediately upon creation of reefs in June 2002. Oysters began setting within 1 month of shell placement. Spat set averaged 0.5 ± 0.1 spat/shell (N = 460) in July 2002 and peaked in October 2002, with an average of 9.5 ± 0.4 spat/shell (N = 542; Fig. 2). No significant difference in oyster spat numbers was detected between low- and high-energy sites.' 'Recruitment and…	Visual surveys
The Potential for Created Oyster Shell Reefs as a Sustainable Shoreline Protection Strategy in Louisiana	INT-112-1	40c	Oyster reef restoration: 'a total of 17.5 m3 of shucked oyster shell (cultch material) was off-loaded at each cultched site, and an experimental reef (25 x 1.0 x 0.7 m) was constructed ... Reefs were built as close to the shoreline as possible. All reefs were placed within 5 m of the shoreline and were intertidal.' Note: clutch is the mass of stones, broken shells, and grit which forms an oyster …	Restoration	Deltas and estuaries	Coastal/marine/freshwater	United States of America	High income	North America	No conflict declared	Yes	Field experiment implemented by author(s)	X				Detailed			X					Gro	Ecosystem functioning and population dynamics	Growth rate	Animals	Animals	Just animals	Bivalvia		Eastern oyster (Crassostrea virginica)		Native	Unclear/partially unclear	Aquatic	Positive	Oyster spat growth was positive throughout the year .... Spat averaged 3.4 ± 0.2 mm after 1 month (July 2002; N¼ 579) and 23.0 ± 0.4 mm (N = 2,252) after 1 year (June 2003). Maximum monthly mean spat size was observed in May 2003 (28.4 ± 0.3 mm; N = 1,963). On average, oyster spat grew at a rate of 0.05 mm/day. Smaller mean spat sizes in June and July 2002 corresponded with the spring spat set. N…	Visual surveys
The impact of ecotourism on livelihood and natural resource management in eselenkei, amboseli ecosystem, Kenya	INT-114-1	41a	Porini Ecotourism Project (PEP), that runs across 16ha of the Eselenkei Conservation Area in Kenya, promoting 'low tourism and wildlife conservation, and generate income and economic benefits for the community to avoid dependence on pastoralism alone and, reduce wildlife-related conflicts.'	Protection	Tropical and subtropical grasslands	Other terrestrial	Kenya	Lower middle income	Africa	No conflict declared	No			X			Detailed			X					Sp ab	Ecosystem composition	Population size	Animals	Animals	Just animals	Aves, mammalia		Lions, giraffes, birds, bush-loving wildlife		Unclear	Unclear/partially unclear	Aboveground	Mixed	The numbers of wildlife (including charismatic species) in ECA [Eselenkei Conservation Area] have either remained stable or increased. The number of resident lions stands at 14 [in 2002], having risen from almost none at the time of project inception in 1997. Resident giraffes, bird species and bush-loving wildlife have more than doubled following the increase in biomass and antipoaching campaign…	Qualitative primary data
Effects of integrated watershed management on livestock water productivity in water scarce areas in Ethiopia	INT-115-1	42a	Rangeland exclosures: '208 ha of degraded hillslopes were closed for grazing and equally distributed among 530 farmers in the watershed. To speed up the rehabilitation of the degraded hillslopes, contour trenches were made for improved water infiltration and various multi-purpose trees were planted at the time of closing in all protected areas.' 'Details about the implementation of the integrated…	Combination	Montane/Alpine	Other terrestrial	Ethiopia	Low income	Africa	No conflict declared	No			X			Detailed				Inferred historical baseline by interviewees				Biom	Biomass	Plant biomass production	Plants	Plants	Just plants		Trees & grasses & other plants	Herbaceous and woody biomass		Unclear	Unclear/partially unclear	Aboveground	Positive	Thanks to the protection from grazing, herbaceous and woody biomass production in exclosures recovered drastically, even after a few years [after the intervention was initiated]'	Qualitative primary data
Impact of China's Grain for Green Project on the landscape of vulnerable arid and semi-arid agricultural regions: a case study in northern Shaanxi Province	INT-120-1	43a	Exclusion of livestock from overgrazed areas and the elimination of cultivation in marginal areas (abandoned land on which grazing and agriculture had been prohibited under the Grain for Green Poject (GGP))	Restoration	Temperate grasslands	Other terrestrial	China	Upper middle income	Asia + Pacific	No conflict declared	No		X				Detailed			X			X		Veg ext	Biomass	Vegetation cover	Plants	Plants	Plants & other		Trees & grasses & other plants	Tree and herbacieous vegetation i.e. grasses, forbs herbs		Unclear	Unclear/partially unclear	Aboveground	Positive	Prohibiition of grazing led to an increase in vegetation cover by an average of 99% from 1998-2005. Prohibition of cultivation led to an incease in vegetation cover by an average of 10.4% 1998-2005. Averaged across 0.5ha plots in 25 villages across 5 countires.	Visual surveys
Impact of China's Grain for Green Project on the landscape of vulnerable arid and semi-arid agricultural regions: a case study in northern Shaanxi Province	INT-120-1	43b	Exclusion of livestock from overgrazed areas and the elimination of cultivation in marginal areas (abandoned land on which grazing and agriculture had been prohibited under the Grain for Green Poject (GGP))	Restoration	Temperate grasslands	Other terrestrial	China	Upper middle income	Asia + Pacific	No conflict declared	No		X				Detailed				Inferred change over time		X		Veg dens	Biomass	Percentage cover	Fungi	Microorganisms, fungi & other	Plants & other			Lichen		Unclear	Unclear/partially unclear	Aboveground	Positive	Lichen percentage cover reached 63.2% by 2005; the authors infer that it increased overtime.	Visual surveys
Impact of China's Grain for Green Project on the landscape of vulnerable arid and semi-arid agricultural regions: a case study in northern Shaanxi Province	INT-120-1	43c	Exclusion of livestock from overgrazed areas and the elimination of cultivation in marginal areas (abandoned land on which grazing and agriculture had been prohibited under the Grain for Green Poject (GGP))	Restoration	Temperate grasslands	Other terrestrial	China	Upper middle income	Asia + Pacific	No conflict declared	No		X				Detailed				Inferred change over time		X		Sp ri	Diversity		Plants	Plants	Plants & other		Trees & grasses & other plants	The main community types included Artemisia gmelinii , Artemisia giraldii , and Artemisia japonica communities. Plus shrubs and shrubby species, including Lespedeza dahurica , Periploca sepium , Ziziphus jujuba var. spinosa , and Sophora viciifolia , also appeared after the abandonment of cultivation.		Unclear	Unclear/partially unclear	Aboveground	Positive	The number of plant species increased to 21-31 species in plots with prohibited cultivation/grazing by 2005. Not said explicity how many species were present before the intervention, but inferred to be none/low.	Visual surveys
Impact of China's Grain for Green Project on the landscape of vulnerable arid and semi-arid agricultural regions: a case study in northern Shaanxi Province	INT-120-1	43d	Exclusion of livestock from overgrazed areas and the elimination of cultivation in marginal areas (abandoned land on which grazing and agriculture had been prohibited under the Grain for Green Poject (GGP))	Restoration	Temperate grasslands	Other terrestrial	China	Upper middle income	Asia + Pacific	No conflict declared	No		X				Detailed				Inferred change over time				Tax pre	Ecosystem composition	Presence of shrubs	Plants	Plants	Plants & other		Other plants	Several shrubs and shrubby species, including Lespedeza dahurica , Periploca sepium , Ziziphus jujuba var. spinosa , and Sophora viciifolia		Unclear	Unclear/partially unclear	Aboveground	Positive	"Several shrubs and shrubby species, including Lespedeza dahurica , Periploca sepium , Ziziphus jujuba var. spinosa , and Sophora viciifolia , also appeared after the abandonment of cultivation."	Visual surveys
Impact of China's Grain for Green Project on the landscape of vulnerable arid and semi-arid agricultural regions: a case study in northern Shaanxi Province	INT-120-2	43.1a	Afforestation plots: Five species of non-native trees were planted in single-species plantations (Robinia pseudoacacia, Prunus armeniaca, Hippophae rhamnoides, Platycladus orientalis, and Caragana korshinskii) and in mixed-species plantations (R. pseudoacacia with C. korshinskii)	Created habitats	Created forest	Forest	China	Upper middle income	Asia + Pacific	No conflict declared	No		X				Detailed			X			X		Veg ext	Biomass	Vegetation cover	Plants	Plants	Plants & other		Trees & grasses & other plants	Five species of non-native trees were planted in single-species plantations ( Robinia pseudoacacia , Prunus armeniaca , Hippophae rhamnoides , Platycladus orientalis , and Caragana korshinskii ) and in mixed-species plantations ( R. pseudoacacia with C. korshinskii ). Plus other plant species that were not planted.		Mixed	At least some invasive/non-native	Aboveground	Negative	Afforestation led to a net decrease in total vegetation cover by an average of 6.1% from 1998 to 2005. Vegetation cover was an average on 30.2% in afforested by plots in 2005 (32.3% lower than in the abandoned plots (those with grazing/cultivation excluded)). Native vegetation had to be destroyed to allow trees to be planted (an average of 2.3m2/tree), and more vegetation was destroyed by e.g. di…	Visual surveys
Impact of China's Grain for Green Project on the landscape of vulnerable arid and semi-arid agricultural regions: a case study in northern Shaanxi Province	INT-120-2	43.1b	Afforestation plots: Five species of non-native trees were planted in single-species plantations (Robinia pseudoacacia, Prunus armeniaca, Hippophae rhamnoides, Platycladus orientalis, and Caragana korshinskii) and in mixed-species plantations (R. pseudoacacia with C. korshinskii)	Created habitats	Created forest	Forest	China	Upper middle income	Asia + Pacific	No conflict declared	No		X				Detailed				Inferred change over time		X		Veg dens	Biomass	Percentage cover	Fungi	Microorganisms, fungi & other	Plants & other			Lichen		Unclear	At least some invasive/non-native	Aboveground	Positive	Lichen percentage reached only 38.4% by 2005 (39.2% lower than in the plots with prohibied grazing/cultivation), but the authors do infer that it increased overtime.	Visual surveys
Impact of China's Grain for Green Project on the landscape of vulnerable arid and semi-arid agricultural regions: a case study in northern Shaanxi Province	INT-120-2	43.1c	Afforestation plots: Five species of non-native trees were planted in single-species plantations (Robinia pseudoacacia, Prunus armeniaca, Hippophae rhamnoides, Platycladus orientalis, and Caragana korshinskii) and in mixed-species plantations (R. pseudoacacia with C. korshinskii)	Created habitats	Created forest	Forest	China	Upper middle income	Asia + Pacific	No conflict declared	No		X				Detailed				Inferred change over time		X		Sp ri	Diversity		Plants	Plants	Plants & other		Trees & grasses & other plants	The main community types included Artemisia gmelinii , Artemisia giraldii , and Artemisia japonica communities.		Mixed	At least some invasive/non-native	Aboveground	Positive	The number of plant species increased to 4-14 species in afforestation plots by 2005. This was considerably lower than in plots that regenerated naturally (prohibited from grazing/cultivation).	Visual surveys
Impact of China's Grain for Green Project on the landscape of vulnerable arid and semi-arid agricultural regions: a case study in northern Shaanxi Province	INT-120-2	43.1d	Afforestation plots: Five species of non-native trees were planted in single-species plantations (Robinia pseudoacacia, Prunus armeniaca, Hippophae rhamnoides, Platycladus orientalis, and Caragana korshinskii) and in mixed-species plantations (R. pseudoacacia with C. korshinskii)	Created habitats	Created forest	Forest	China	Upper middle income	Asia + Pacific	No conflict declared	No		X				Detailed			X					Sur r	Ecosystem functioning and population dynamics	Tree survival rate	Plants	Plants	Plants & other		Trees	Five species of non-native trees were planted in single-species plantations ( Robinia pseudoacacia , Prunus armeniaca , Hippophae rhamnoides , Platycladus orientalis , and Caragana korshinskii ) and in mixed-species plantations ( R. pseudoacacia with C. korshinskii ).		Non-native	At least some invasive/non-native	Aboveground	Unclear	Tree survival rates in the afforestation plots averaged 55·7% in the first year after planting (1999) and 49% in the seventh year (2005). Survival rate varied between species, being highest for Robinia pseudoacacia (68.2% in the 7th year), and lowest for P. armeniaca (11·4%), P. orientalis , (12·7%), and for trees in the mixed-species plantation (15·3%).	Visual surveys
Impact of China's Grain for Green Project on the landscape of vulnerable arid and semi-arid agricultural regions: a case study in northern Shaanxi Province	INT-120-2	43.1e	Afforestation plots: Five species of non-native trees were planted in single-species plantations (Robinia pseudoacacia, Prunus armeniaca, Hippophae rhamnoides, Platycladus orientalis, and Caragana korshinskii) and in mixed-species plantations (R. pseudoacacia with C. korshinskii)	Created habitats	Created forest	Forest	China	Upper middle income	Asia + Pacific	No conflict declared	No		X				Detailed					X			Cano	Biomass	Canopy area per tree	Plants	Plants	Plants & other		Trees	Five species of non-native trees were planted in single-species plantations ( Robinia pseudoacacia , Prunus armeniaca , Hippophae rhamnoides , Platycladus orientalis , and Caragana korshinskii ) and in mixed-species plantations ( R. pseudoacacia with C. korshinskii ).		Non-native	At least some invasive/non-native	Aboveground	Unclear	"The canopy area in the afforestation plots averaged 1·2 m2 [per tree] in year 7 ... The mixed-species plantation and R. pseudoacacia showed the greatest mean canopy areas (2·1 and 2·0 m2, respectively)." N.B. canopy area was modelled as an ellipse.	Visual surveys
Impact of China's Grain for Green Project on the landscape of vulnerable arid and semi-arid agricultural regions: a case study in northern Shaanxi Province	INT-120-2	43.1f	Afforestation plots: Five species of non-native trees were planted in single-species plantations (Robinia pseudoacacia, Prunus armeniaca, Hippophae rhamnoides, Platycladus orientalis, and Caragana korshinskii) and in mixed-species plantations (R. pseudoacacia with C. korshinskii)	Created habitats	Created forest	Forest	China	Upper middle income	Asia + Pacific	No conflict declared	No		X				Detailed			X					Com c	Ecosystem composition	Community composition, including native vegetation vs. exotic trees	Plants	Plants	Plants & other		Trees & grasses & other plants	Native vegetation, planted non-native trees		Mixed	At least some invasive/non-native	Aboveground	Negative	Replacement of native vegetation by tree-dominated community, with fewer species overall, and exotic tree species.	Visual surveys
The impact of extreme flooding events and anthropogenic stressors on the macrobenthic communities' dynamics	INT-121-1	44a	Seagrass bed restoration: 'Due to the decline of seagrass beds and progressive impoverishment of the habitat, a management programme was implemented in 1998 in order to restore the original seagrass community. This programme included measures to decrease nutrient loading, physical protection of the seagrass bed and improvement of the hydraulic regime, by enlarging the connection between the two a…	Restoration	Seagrass	Coastal/marine/freshwater	Portugal	High income	Europe	No conflict declared	Unclear		X				Detailed			X					Sp ri	Diversity		Animals & plants	Plants, animals, & other	Plants & animals	Bivalvia, clitellata, gastropoda, malacostraca, polychaeta		Macrobenthic fauna including detritovores (including surface-deposit feeders, subsurface-deposit feedbers, and suspension feeders), carnivores, herbivores and omnivores). Macrobenthic fauna include mudsnails (Hydrobia ulvae), bivalves (e.g. Scrobicularia plana (peppery furrow shell) and Cerastoderma edule), and polychaetes (e.g. Hediste diversicolor).		Unclear	Unclear/partially unclear	Aquatic	Positive	Species richness of the segrass bed site, and the intermediate site (a site which spatially lies between the seagrass bed and eutrophic site), started to increase once the restoration programme started in 1998. It increased until the winter of 2000/20001, when there was an unprecendeted high rainfall event leading to the largest flood in Portual of the '20th century'; this in turn led to a fall i…	Visual surveys
The impact of extreme flooding events and anthropogenic stressors on the macrobenthic communities' dynamics	INT-121-1	44b	Seagrass bed restoration: 'Due to the decline of seagrass beds and progressive impoverishment of the habitat, a management programme was implemented in 1998 in order to restore the original seagrass community. This programme included measures to decrease nutrient loading, physical protection of the seagrass bed and improvement of the hydraulic regime, by enlarging the connection between the two a…	Restoration	Seagrass	Coastal/marine/freshwater	Portugal	High income	Europe	No conflict declared	Unclear		X				Detailed			X					Sp ab	Ecosystem composition		Animals & plants	Plants, animals, & other	Plants & animals	Bivalvia, clitellata, gastropoda, malacostraca, polychaeta		Macrobenthic fauna including detritovores (including surface-deposit feeders, subsurface-deposit feedbers, and suspension feeders), carnivores, herbivores and omnivores). Macrobenthic fauna include mudsnails (Hydrobia ulvae), bivalves (e.g. Scrobicularia plana (peppery furrow shell) and Cerastoderma edule), and polychaetes (e.g. Hediste diversicolor).		Unclear	Unclear/partially unclear	Aquatic	Unclear	Economically important bivalves (for fishing) decreased in number in the seagrass site following flooding events. This was probably caused by clogging of feeding structures of these suspension feeders by highly turbid water. Unclear direction of effect, because change was in response to flooding, not the intervention. 'different communities and habitats may respond differently to flooding events,…	Visual surveys
The impact of extreme flooding events and anthropogenic stressors on the macrobenthic communities' dynamics	INT-121-1	44c	Seagrass bed restoration: 'Due to the decline of seagrass beds and progressive impoverishment of the habitat, a management programme was implemented in 1998 in order to restore the original seagrass community. This programme included measures to decrease nutrient loading, physical protection of the seagrass bed and improvement of the hydraulic regime, by enlarging the connection between the two a…	Restoration	Seagrass	Coastal/marine/freshwater	Portugal	High income	Europe	No conflict declared	Unclear		X				Detailed			X					Sp di	Diversity	Shannon diversity index (a.k.a. Shannon-Wiener diversity index)	Animals & plants	Plants, animals, & other	Plants & animals	Bivalvia, clitellata, gastropoda, malacostraca, polychaeta		Macrobenthic fauna including detritovores (including surface-deposit feeders, subsurface-deposit feedbers, and suspension feeders), carnivores, herbivores and omnivores). Macrobenthic fauna include mudsnails (Hydrobia ulvae), bivalves (e.g. Scrobicularia plana (peppery furrow shell) and Cerastoderma edule), and polychaetes (e.g. Hediste diversicolor).		Unclear	Unclear/partially unclear	Aquatic	Positive	Shannon-Wiener index (an indicator of heterogeity) increased after restoration was initiated for the eutrophic and intermediate sites, but showed no change at the seagrass bed; the index was consistently lower for the seagrass bed than the other sites (this reflects the low species evenness of this site, caused by the dominance of mudsnails).	Visual surveys
The impact of extreme flooding events and anthropogenic stressors on the macrobenthic communities' dynamics	INT-121-1	44d	Seagrass bed restoration: 'Due to the decline of seagrass beds and progressive impoverishment of the habitat, a management programme was implemented in 1998 in order to restore the original seagrass community. This programme included measures to decrease nutrient loading, physical protection of the seagrass bed and improvement of the hydraulic regime, by enlarging the connection between the two a…	Restoration	Seagrass	Coastal/marine/freshwater	Portugal	High income	Europe	No conflict declared	Unclear		X				Detailed			X					Sp di	Diversity	Simpson's diversity index	Animals & plants	Plants, animals, & other	Plants & animals	Bivalvia, clitellata, gastropoda, malacostraca, polychaeta		Macrobenthic fauna including detritovores (including surface-deposit feeders, subsurface-deposit feedbers, and suspension feeders), carnivores, herbivores and omnivores). Macrobenthic fauna include mudsnails (Hydrobia ulvae), bivalves (e.g. Scrobicularia plana (peppery furrow shell) and Cerastoderma edule), and polychaetes (e.g. Hediste diversicolor).		Unclear	Unclear/partially unclear	Aquatic	Positive	Simpson's diversity index (gives weight to dominant species) decreased after restoration was initiated for the eutrophic and intermediate areas, but didn't show a trend for the seagrass beds. Overall, dominance index was greater for the seagrass beds.	Visual surveys
The impact of extreme flooding events and anthropogenic stressors on the macrobenthic communities' dynamics	INT-121-1	44e	Seagrass bed restoration: 'Due to the decline of seagrass beds and progressive impoverishment of the habitat, a management programme was implemented in 1998 in order to restore the original seagrass community. This programme included measures to decrease nutrient loading, physical protection of the seagrass bed and improvement of the hydraulic regime, by enlarging the connection between the two a…	Restoration	Seagrass	Coastal/marine/freshwater	Portugal	High income	Europe	No conflict declared	Unclear		X				Detailed			X					Sp ev	Diversity	Pielou's Equitability index	Animals & plants	Plants, animals, & other	Plants & animals	Bivalvia, clitellata, gastropoda, malacostraca, polychaeta		Macrobenthic fauna including detritovores (including surface-deposit feeders, subsurface-deposit feedbers, and suspension feeders), carnivores, herbivores and omnivores). Macrobenthic fauna include mudsnails (Hydrobia ulvae), bivalves (e.g. Scrobicularia plana (peppery furrow shell) and Cerastoderma edule), and polychaetes (e.g. Hediste diversicolor).		Unclear	Unclear/partially unclear	Aquatic	Positive	Species evenness increase significantly between pre- and post-restoration period for the eutrophic and the intermediate sites, but not for the seagrass bed site, where species evenness was more stable and lower. The lower evenness at the seagrass site was attributed to the dominance of mudsnail at this site.	Visual surveys
The impact of extreme flooding events and anthropogenic stressors on the macrobenthic communities' dynamics	INT-121-1	44f	Seagrass bed restoration: 'Due to the decline of seagrass beds and progressive impoverishment of the habitat, a management programme was implemented in 1998 in order to restore the original seagrass community. This programme included measures to decrease nutrient loading, physical protection of the seagrass bed and improvement of the hydraulic regime, by enlarging the connection between the two a…	Restoration	Seagrass	Coastal/marine/freshwater	Portugal	High income	Europe	No conflict declared	Unclear		X				Detailed			X					Biom	Biomass	Biomass	Animals & plants	Plants, animals, & other	Plants & animals	Bivalvia, clitellata, gastropoda, malacostraca, polychaeta		Macrobenthic fauna including detritovores (including surface-deposit feeders, subsurface-deposit feedbers, and suspension feeders), carnivores, herbivores and omnivores). Macrobenthic fauna include mudsnails (Hydrobia ulvae), bivalves (e.g. Scrobicularia plana (peppery furrow shell) and Cerastoderma edule), and polychaetes (e.g. Hediste diversicolor).		Unclear	Unclear/partially unclear	Aquatic	Positive	Biomass of seagrass and other taxa increased in the post-restoration phase (stat sig), with much of this increase attributed to growth of longer-lived, large bodied taxa (e.g. ragworms and bivalve molluscs). Biomass also varied less over time after restoration than before restoration, due to the absence of algal blooms. However, it was still decreased in response to the extreme flooding event in …	Visual surveys
The impact of extreme flooding events and anthropogenic stressors on the macrobenthic communities' dynamics	INT-121-1	44g	Seagrass bed restoration: 'Due to the decline of seagrass beds and progressive impoverishment of the habitat, a management programme was implemented in 1998 in order to restore the original seagrass community. This programme included measures to decrease nutrient loading, physical protection of the seagrass bed and improvement of the hydraulic regime, by enlarging the connection between the two a…	Restoration	Seagrass	Coastal/marine/freshwater	Portugal	High income	Europe	No conflict declared	Unclear		X				Detailed			X					Veg dens	Biomass	Macrobenthic density	Animals & plants	Plants, animals, & other	Plants & animals	Bivalvia, clitellata, gastropoda, malacostraca, polychaeta		Macrobenthic fauna including detritovores (including surface-deposit feeders, subsurface-deposit feedbers, and suspension feeders), carnivores, herbivores and omnivores). Macrobenthic fauna include mudsnails (Hydrobia ulvae), bivalves (e.g. Scrobicularia plana (peppery furrow shell) and Cerastoderma edule), and polychaetes (e.g. Hediste diversicolor).		Unclear	Unclear/partially unclear	Aquatic	Positive	Density of seagrass and other taxa increased in the post-restoration phase, but to a lesser extent than biomass.	Visual surveys
The impact of extreme flooding events and anthropogenic stressors on the macrobenthic communities' dynamics	INT-121-1	44h	Seagrass bed restoration: 'Due to the decline of seagrass beds and progressive impoverishment of the habitat, a management programme was implemented in 1998 in order to restore the original seagrass community. This programme included measures to decrease nutrient loading, physical protection of the seagrass bed and improvement of the hydraulic regime, by enlarging the connection between the two a…	Restoration	Seagrass	Coastal/marine/freshwater	Portugal	High income	Europe	No conflict declared	Unclear		X				Detailed			X					Fun id	Ecosystem functioning and population dynamics	Relative abundance of trophic (sub-)groups	Animals & plants	Plants, animals, & other	Plants & animals	Bivalvia, clitellata, gastropoda, malacostraca, polychaeta		Macrobenthic fauna including detritovores (including surface-deposit feeders, subsurface-deposit feedbers, and suspension feeders), carnivores, herbivores and omnivores). Macrobenthic fauna include mudsnails (Hydrobia ulvae), bivalves (e.g. Scrobicularia plana (peppery furrow shell) and Cerastoderma edule), and polychaetes (e.g. Hediste diversicolor).		Unclear	Unclear/partially unclear	Aquatic	Unclear	The data suggest a replacement of detritovores by omnivores in the seagrass bed, and the intermediate (between seagrass and eutrophic) site. Overall, the seagrass bed supported a higher percentage of carnivores, herbivores and omnivores than the eutrophic area, which makes the latter less functionally rich.	Visual surveys
The impact of extreme flooding events and anthropogenic stressors on the macrobenthic communities' dynamics	INT-121-1	44i	Seagrass bed restoration: 'Due to the decline of seagrass beds and progressive impoverishment of the habitat, a management programme was implemented in 1998 in order to restore the original seagrass community. This programme included measures to decrease nutrient loading, physical protection of the seagrass bed and improvement of the hydraulic regime, by enlarging the connection between the two a…	Restoration	Seagrass	Coastal/marine/freshwater	Portugal	High income	Europe	No conflict declared	Unclear		X				Detailed			X					Com c	Ecosystem composition	Principal Response Curves (PRC) analysis	Animals & plants	Plants, animals, & other	Plants & animals	Bivalvia, clitellata, gastropoda, malacostraca, polychaeta		Macrobenthic fauna including detritovores (including surface-deposit feeders, subsurface-deposit feedbers, and suspension feeders), carnivores, herbivores and omnivores). Macrobenthic fauna include mudsnails (Hydrobia ulvae), bivalves (e.g. Scrobicularia plana (peppery furrow shell) and Cerastoderma edule), and polychaetes (e.g. Hediste diversicolor).		Unclear	Unclear/partially unclear	Aquatic	Positive	In the years post-restoration, the seagrass bed and intermediate site converged in composition towards the reference site until the end of 2000 (when the flood took place), and afer a relapse started changing in composiiton again towards that of the reference. Most of this change was contributed by plychaete Chaetozone setosa, and the oligochaete family Tubifcidae, which both had high positive we…	Visual surveys
The impact of extreme flooding events and anthropogenic stressors on the macrobenthic communities' dynamics	INT-121-1	44j	Seagrass bed restoration: 'Due to the decline of seagrass beds and progressive impoverishment of the habitat, a management programme was implemented in 1998 in order to restore the original seagrass community. This programme included measures to decrease nutrient loading, physical protection of the seagrass bed and improvement of the hydraulic regime, by enlarging the connection between the two a…	Restoration	Seagrass	Coastal/marine/freshwater	Portugal	High income	Europe	No conflict declared	Unclear		X				Detailed			X					Com c	Ecosystem composition	Multi Dimensional Scaling (MDS) ordination on the Bray-Curtis similarity index	Animals & plants	Plants, animals, & other	Plants & animals	Bivalvia, clitellata, gastropoda, malacostraca, polychaeta		Macrobenthic fauna including detritovores (including surface-deposit feeders, subsurface-deposit feedbers, and suspension feeders), carnivores, herbivores and omnivores). Macrobenthic fauna include mudsnails (Hydrobia ulvae), bivalves (e.g. Scrobicularia plana (peppery furrow shell) and Cerastoderma edule), and polychaetes (e.g. Hediste diversicolor).		Unclear	Unclear/partially unclear	Aquatic	Positive	The macrobenthic assemblages of the seagrass and intermediate plots in the years after the intervention but before the flood (1999-2001) were more similar to the assemblages at the beginning of the study (1993), when the seagrass less degraded. However, even the seagrass site did not return in community composition to match the reference site from 1993.	Visual surveys
Eco-compensation effects of the wetland recovery in Dongting Lake area	INT-122-1	45a	Restoring wetland area by returning polders in agricultural lands to lakes, in the Yangtze River Valley, China: 'The total polders which returned farmland to lake in the Dongting Lake area were 314, in- cluding two categories, i.e., the double restoration of the polders and the single one.'. This involved flattening a total of 157,800 hm2 of embankment, about half of which was farmland, and reloc…	Restoration	Ponds and lakes, Wetlands	Terrestrial-aquatic/coastal combination	China	Upper middle income	Asia + Pacific	No conflict declared	Unclear		X		X	Zhang G G, 2002. Effect of re-submerging particular polders on the ecological environment of Dongting Lake. Yangtze River, 33(5): 39–41. (in Chinese)	Secondary data so NA				Stated change over time				Sp ri	Diversity		Animals	Animals	Plants & animals	Aves		Birds (some migratory)		Unclear	Unclear/partially unclear	Aboveground	Positive	After the intervention, the 16 orders, 43 families and 216 species of birds were present at Dongting Lake. An Quingshan Lake there was an increase over time: 'By the winter of 2000, the winter migratory birds had in- creased to 55 species, which created very favorable situation for actively exploiting wetland tourism for bird-sighting'.	Secondary data
Eco-compensation effects of the wetland recovery in Dongting Lake area	INT-122-1	45b	Restoring wetland area by returning polders in agricultural lands to lakes, in the Yangtze River Valley, China: 'The total polders which returned farmland to lake in the Dongting Lake area were 314, in- cluding two categories, i.e., the double restoration of the polders and the single one.'. This involved flattening a total of 157,800 hm2 of embankment, about half of which was farmland, and reloc…	Restoration	Ponds and lakes, Wetlands	Terrestrial-aquatic/coastal combination	China	Upper middle income	Asia + Pacific	No conflict declared	Unclear		X				Poor detail					X			Tax pre	Ecosystem composition	Presence of rare species	Animals	Animals	Plants & animals	Aves		Class I protected species: Ciconia boyciana, Ciconianigra, Grus leucogeranus, Mergus squamatus, hooded crane, Great Bustard, and class II protected species: e.g. Platalea leucorodia, Cygnus Cygnus, Aixgalericulata, Grus vipio, Grus gru, Anser albifrons. 'State endangered birds': Cygnus cygnus, Platalea leu- corodia, Phalacrocoraxcarbo.		Unclear	Unclear/partially unclear	Aboveground	Unclear	The bird species present at Dongting Lake included 32 rare species, 6 of which were 'class I protected', and 26 of which belonged to class II. The outcome direction is unclear because there was no comparison with a counterfactual scenario. At Quingshan Lake there were winter migratory birds including 'state endangered birds'.	Unclear
Eco-compensation effects of the wetland recovery in Dongting Lake area	INT-122-1	45c	Restoring wetland area by returning polders in agricultural lands to lakes, in the Yangtze River Valley, China: 'The total polders which returned farmland to lake in the Dongting Lake area were 314, in- cluding two categories, i.e., the double restoration of the polders and the single one.'. This involved flattening a total of 157,800 hm2 of embankment, about half of which was farmland, and reloc…	Restoration	Ponds and lakes, Wetlands	Terrestrial-aquatic/coastal combination	China	Upper middle income	Asia + Pacific	No conflict declared	Unclear		X				Poor detail					X			Sp ab	Ecosystem composition	Number of individuals	Animals	Animals	Plants & animals	Aves		Birds		Unclear	Unclear/partially unclear	Aboveground	Unclear	The number of resident birds annually reaces 1.59 million.	Unclear
Poverty Alleviation and Environmental Restoration Using the Clean Development Mechanism: A Case Study from Humbo, Ethiopia	INT-124-1	46a	Combination of restoration and management: Farmer Managed Natural Regeneration (FMNR); the project was part of the Clean Development Mechanism. It involved: - Restoration and sustainable management of degraded forest by protection from overgrazing, overcutting and charcoal production; tree pruning to aid regrowth; coppicing; weeding and strategic replanting. - Community members paid a membership …	Combination	Tropical and subtropical forests	Forest	Ethiopia	Low income	Africa	No conflict declared	Yes	Author(s) associated with intervention & funding		X			Poor detail				Inferred change over time				Biom	Biomass	Grass productivity	Plants	Plants	Animals & plants		Grasses	Grass		Unclear	Unclear/partially unclear	Aboveground	Positive	Quote from a community member: ‘‘We are too much happy [sic]. Wenever expected to see so much grass growing from these rocky, barren slopes, to see trees growing so quickly or to harvest firewood so early in the program"; and from the study authors: "Within the first year of livestock exclusion, one ofthe seven communities reported that the landscape had recovered sufficiently that they harvested…	Qualitative primary data
Poverty Alleviation and Environmental Restoration Using the Clean Development Mechanism: A Case Study from Humbo, Ethiopia	INT-124-1	46b	Combination of restoration and management: Farmer Managed Natural Regeneration (FMNR); the project was part of the Clean Development Mechanism. It involved: - Restoration and sustainable management of degraded forest by protection from overgrazing, overcutting and charcoal production; tree pruning to aid regrowth; coppicing; weeding and strategic replanting. - Community members paid a membership …	Combination	Tropical and subtropical forests	Forest	Ethiopia	Low income	Africa	No conflict declared	Yes	Author(s) associated with intervention & funding		X			Poor detail				Inferred change over time				Tax pre	Ecosystem composition	Animal taxa presence	Animals	Animals	Animals & plants	Aves, mammalia		Antelope, wild goat, birds, wildlife		Unclear	Unclear/partially unclear	Aboveground	Positive	"Sightings have been made of wildlife, which had previously left the area, including antelope and wild goat" Community members "have observed an increased presence of wildlife and birds in the forest". - not clear if this is species presence or abundance.	Qualitative primary data
The Importance of Phytogenic Mounds (Nebkhas) for Restoration of Arid Degraded Rangelands in Northern Sinai	INT-127-1	47a	Protection of white broom nebkhas (phytogenic mounds) from heavy goat and sheep grazing for 12 years; occurred within a broader protected area nature reserve. Mix of protection and restoration.	Combination	Deserts and xeric shrublands	Other terrestrial	Egypt, Arab Rep.	Lower middle income	Africa	No conflict declared	No		X				Detailed	X							Sp ri	Diversity	Species/m2	Plants	Plants	Just plants		Grasses & other plants	Retama raetam (white broom), 3 palatale grasses, 2 short grasses, 2 forbs, short forbs (and other plants)		Unclear	Unclear/partially unclear	Aboveground	Positive	Grazing had a negative effect on species richness of herbaveous species in both internebka spaces, and in nebkha patches. Nebkha area explained 36% of variance in species richness at grazed nebkha sites, compared to 19% at ungrazed (protected) sites.	Visual surveys
The Importance of Phytogenic Mounds (Nebkhas) for Restoration of Arid Degraded Rangelands in Northern Sinai	INT-127-1	47b	Protection of white broom nebkhas (phytogenic mounds) from heavy goat and sheep grazing for 12 years; occurred within a broader protected area nature reserve. Mix of protection and restoration.	Combination	Deserts and xeric shrublands	Other terrestrial	Egypt, Arab Rep.	Lower middle income	Africa	No conflict declared	No		X				Detailed	X							Sp ab	Ecosystem composition		Plants	Plants	Just plants		Grasses & other plants	Retama raetam (white broom), 3 palatale grasses, 2 short grasses, 2 forbs, short forbs (and other plants)		Unclear	Unclear/partially unclear	Aboveground	Positive	Protection from grazing led to increased species abundance of herbaceous species in both internebka spaces and in nebkha patches themselves. Nebkha area explained 54% of variance in species abundance at grazed nebkha sites, compared to 38% at ungrazed (protected) sites.	Visual surveys
The Importance of Phytogenic Mounds (Nebkhas) for Restoration of Arid Degraded Rangelands in Northern Sinai	INT-127-1	47c	Protection of white broom nebkhas (phytogenic mounds) from heavy goat and sheep grazing for 12 years; occurred within a broader protected area nature reserve. Mix of protection and restoration.	Combination	Deserts and xeric shrublands	Other terrestrial	Egypt, Arab Rep.	Lower middle income	Africa	No conflict declared	No		X				Detailed	X							Tax pre	Ecosystem composition	Species distribution	Plants	Plants	Just plants		Grasses & other plants	Retama raetam (white broom), 3 palatale grasses, 2 short grasses, 2 forbs, short forbs (and other plants)		Unclear	Unclear/partially unclear	Aboveground	Positive	At the grazed site an average of 42% of species were restricted to the nebkha patch, and 7% to the internebkha patches. Whereas, at the ungrazed (protected) site, just 22% of species were found in nebkha patches, and a higher proportion (11%) in internebkha patches. The authors attributed this to trampling and erosion in internebkha patches leading to soil particles, organic matter, nutriends and…	Visual surveys
The Importance of Phytogenic Mounds (Nebkhas) for Restoration of Arid Degraded Rangelands in Northern Sinai	INT-127-1	47d	Protection of white broom nebkhas (phytogenic mounds) from heavy goat and sheep grazing for 12 years; occurred within a broader protected area nature reserve. Mix of protection and restoration.	Combination	Deserts and xeric shrublands	Other terrestrial	Egypt, Arab Rep.	Lower middle income	Africa	No conflict declared	No		X				Detailed	X							Veg ext	Biomass		Plants	Plants	Just plants		Grasses & other plants	Retama raetam (white broom), 3 palatale grasses, 2 short grasses, 2 forbs, short forbs (and other plants)		Unclear	Unclear/partially unclear	Aboveground	Positive	Mean length, width and area of ungrazed nebkhas was greater than nebkhas not protected from grazing; but grazed nebkhas were taller than ungrazed ones (attributed to greater soil erosion in internebkha patches accumulating at the nebkhas). Average area of litter accumulation was also higher for ungrazed than grazed nebkhas.	Visual surveys
Livestock, soil compaction and water infiltration rate: Evaluating a potential desertification recovery mechanism	INT-133-1	48a	Three livestock exclosures in Arizona, established 1958, 1977 and 1993; before the exclosures were established the sites were heavily overgrazed and suffered from drought, described as desertified and encraoched by shrubs. Mix of restoration and protection.	Combination	Temperate grasslands	Other terrestrial	United States of America	High income	North America	No conflict declared	No		X		X	Valone, T.J., Meyer, M., Brown, J.H., Chew, R.M., 2002. Timescale of perennial grass recovery in desertified arid grasslands following livestock removal. Conservation Biology 16, 995–1002 Valone, T.J., Kelt, D.A., 1999. Fire and grazing in a shrub-invaded arid grassland community: independent or interactive ecological effects? Journal of Arid Environments 42, 15–28.	Secondary data so NA				Space for time				Veg dens	Biomass	Mean percentage cover (total and basal perennial grass)	Plants	Plants	Just plants		Grasses & other plants	Perennial grases (primarily Bouteloua eriopoda (black gramma)), other vegetation		Unclear	Unclear/partially unclear	Aboveground	Positive	Mean % basal perennial grass cover was stat sig higher inside the oldest exclosure. Mean % basal perennial grass cover was equal inside and outside the second oldest exclosure, and grass cover was non stat sig lower inside than outside the exclosure at the youngest site. i.e. grass cover increased with age of exclosure. Mean % total vegetation cover did not differ stat significantly between in an…	Visual surveys & secondary data
Livestock, soil compaction and water infiltration rate: Evaluating a potential desertification recovery mechanism	INT-133-1	48b	Three livestock exclosures in Arizona, established 1958, 1977 and 1993; before the exclosures were established the sites were heavily overgrazed and suffered from drought, described as desertified and encraoched by shrubs. Mix of restoration and protection.	Combination	Temperate grasslands	Other terrestrial	United States of America	High income	North America	No conflict declared	No		X		X	Valone, T.J., Meyer, M., Brown, J.H., Chew, R.M., 2002. Timescale of perennial grass recovery in desertified arid grasslands following livestock removal. Conservation Biology 16, 995–1002 Valone, T.J., Kelt, D.A., 1999. Fire and grazing in a shrub-invaded arid grassland community: independent or interactive ecological effects? Journal of Arid Environments 42, 15–28.	Secondary data so NA				Space for time				Cano	Biomass	Mean percentage shrub canopy cover	Plants	Plants	Just plants		Other plants	Shrubs, including Acacia spp., Ephedra trifurca, Flourensia cernua and Gutierrezia sarothrae		Unclear	Unclear/partially unclear	Aboveground	Unclear	Mean % shrub canopy cover was stat significantly lower inside than outside the exclosure at the oldest site, and did not differ stat sig at the two yougner sites. Together with the change in grass cover, this suggests that as exclosures aged, grass cover increased and shrub cover decreased. The authors frame increasing shrub cover (and associated increased bare ground) as a deterioration of the e…	Visual surveys & secondary data
Freshwater management and climate change adaptation: Experiences from the central Yangtze in China	INT-134-1	49a	Restoration: reconnection of three lakes to the Yangtze river, by opening sluice gates seasonally to permit seasonal flooding (that natural phenomenon, before the lakes were sectioned off from the river), and improving lake management such as removal or modification of illegal and uneconomical aquaculture facilities in the lakes. And management: promotion of community-based and wise use of wetlan…	Combination	Ponds and lakes, Wetlands	Terrestrial-aquatic/coastal combination	China	Upper middle income	Asia + Pacific	No conflict declared	Yes	Author(s) associated with intervention	X				Poor detail				Stated change over time				Veg ext	Biomass	Area of protected wetland	Plants	Plants	Animals, plants & other		Other plants			Unclear	Unclear/partially unclear	Aboveground	Positive	Over 400km2 of wetland restored and protected.	Unclear
Freshwater management and climate change adaptation: Experiences from the central Yangtze in China	INT-134-1	49b	Restoration: reconnection of three lakes to the Yangtze river, by opening sluice gates seasonally to permit seasonal flooding (that natural phenomenon, before the lakes were sectioned off from the river), and improving lake management such as removal or modification of illegal and uneconomical aquaculture facilities in the lakes. And management: promotion of community-based and wise use of wetlan…	Combination	Ponds and lakes, Wetlands	Terrestrial-aquatic/coastal combination	China	Upper middle income	Asia + Pacific	No conflict declared	Yes	Author(s) associated with intervention	X				Poor detail				Stated change over time				Tax pre	Ecosystem composition	Presence of previously absent species	Animals	Animals	Animals, plants & other	Aves, pisces		Oreintal white stork, migratory fish, ice fish (Pseudolaubuca engraulis)		Unclear	Unclear/partially unclear	Aboveground & aquatic	Positive	Endangered oriental white stork have returned to Taking Hong Lake, after abandoning it 11 years earlier. 12 migratory fish species also returned to the lake. Ice fish reappeared at Tian-e-zhou Lake, after a 20 year absence.	Unclear
Freshwater management and climate change adaptation: Experiences from the central Yangtze in China	INT-134-1	94c	Restoration: reconnection of three lakes to the Yangtze river, by opening sluice gates seasonally to permit seasonal flooding (that natural phenomenon, before the lakes were sectioned off from the river), and improving lake management such as removal or modification of illegal and uneconomical aquaculture facilities in the lakes. And management: promotion of community-based and wise use of wetlan…	Combination	Ponds and lakes, Wetlands	Terrestrial-aquatic/coastal combination	China	Upper middle income	Asia + Pacific	No conflict declared	Yes	Author(s) associated with intervention	X				Poor detail				Stated change over time				H qual	Habitat quality	Statements of improved habitat quality with some supporting info e.g. water quality	Plants & NA	Plants, animals, & other	Animals, plants & other		Other plants	Aquatic vegetation	X	Unclear	Unclear/partially unclear	Aboveground & aquatic	Positive	Removal of 80% of fixed fishing nets allegedly "improved habitat quality", and the "ecological condition of the wetlands has greatly improved", "aquatic vegetation has been restored", and "water quality in the demonstration sites improved from national Class IV to II (i.e. suitable for drinking after simple processing)."	Unclear
Freshwater management and climate change adaptation: Experiences from the central Yangtze in China	INT-134-1	49d	Restoration: reconnection of three lakes to the Yangtze river, by opening sluice gates seasonally to permit seasonal flooding (that natural phenomenon, before the lakes were sectioned off from the river), and improving lake management such as removal or modification of illegal and uneconomical aquaculture facilities in the lakes. And management: promotion of community-based and wise use of wetlan…	Combination	Ponds and lakes, Wetlands	Terrestrial-aquatic/coastal combination	China	Upper middle income	Asia + Pacific	No conflict declared	Yes	Author(s) associated with intervention	X				Poor detail				Stated change over time				Frag	Landscape structure	Statement of connectivity	NA	Microorganisms, fungi & other	Animals, plants & other			Waterbodies	X	NA	Unclear/partially unclear	Aquatic	Positive	Removal of 80% of fixed fishing nets allegedly improved habitat connectivity	Unclear
Freshwater management and climate change adaptation: Experiences from the central Yangtze in China	INT-134-1	49e	Restoration: reconnection of three lakes to the Yangtze river, by opening sluice gates seasonally to permit seasonal flooding (that natural phenomenon, before the lakes were sectioned off from the river), and improving lake management such as removal or modification of illegal and uneconomical aquaculture facilities in the lakes. And management: promotion of community-based and wise use of wetlan…	Combination	Ponds and lakes, Wetlands	Terrestrial-aquatic/coastal combination	China	Upper middle income	Asia + Pacific	No conflict declared	Yes	Author(s) associated with intervention		X			Poor detail				Stated change over time				Sp di	Diversity	Statement of wildlife diversity	Animals & plants	Plants, animals, & other	Animals, plants & other	Unclear	Other plants	Aquatic and wetland wildlife		Unclear	Unclear/partially unclear	Aboveground & aquatic	Positive	"Wildlife diversity" has increased [in lakes and wetlands] (no supporting data)	Unclear
Freshwater management and climate change adaptation: Experiences from the central Yangtze in China	INT-134-1	49f	Restoration: reconnection of three lakes to the Yangtze river, by opening sluice gates seasonally to permit seasonal flooding (that natural phenomenon, before the lakes were sectioned off from the river), and improving lake management such as removal or modification of illegal and uneconomical aquaculture facilities in the lakes. And management: promotion of community-based and wise use of wetlan…	Combination	Ponds and lakes, Wetlands	Terrestrial-aquatic/coastal combination	China	Upper middle income	Asia + Pacific	No conflict declared	Yes	Author(s) associated with intervention	X				Poor detail				Stated change over time				Sp ab	Ecosystem composition	Species abundance comparison	Animals	Animals	Animals, plants & other	Aves, mammalia		Herons, egrets, water birds, Yangtze finless porpoise		Unclear	Unclear/partially unclear	Aboveground & aquatic	Positive	The "population of many species" has increased. E.g. "Hong Lake supported only 100 herons and egrets when polluted, but after restoration 45,000 wintering water birds and 20,000 breeding birds returned." Population size of the Yangtze finless porpoise increased from 24 to 40 in Tian-e-zhou Lake.	Unclear
Overfishing reduces resilience of kelp beds to climate-driven catastrophic phase shift	INT-137-1	50a	Two no-take marine protected areas (established 12 and 31 years before experiment for the two different sites respectively)	Protection	Temperate oceans	Coastal/marine/freshwater	Australia	High income	Asia + Pacific	No conflict declared	Unclear		X				Detailed	X							Sp ab	Ecosystem composition	Species abundance	Animals	Animals	Just animals	Pisces, malacostraca		Palnulirid spiny lobster (Jasus edwardsii), blue-throated wrasse (Notolabrus tetricus)		Native	At least some invasive/non-native	Aquatic	Positive	Palnulirid spiny lobster recovered in numbers inside the MPAs, following the protection from fishing. The abundance of the most abundant wrasse species didn't differ between inside and outside MPAs.	Visual surveys
Overfishing reduces resilience of kelp beds to climate-driven catastrophic phase shift	INT-137-1	50b	Two no-take marine protected areas (established 12 and 31 years before experiment for the two different sites respectively)	Protection	Temperate oceans	Coastal/marine/freshwater	Australia	High income	Asia + Pacific	No conflict declared	Unclear		X				Detailed	X							Age str	Ecosystem functioning and population dynamics	Individual size	Animals	Animals	Just animals	Pisces, malacostraca		Palnulirid spiny lobster (Jasus edwardsii), blue-throated wrasse (Notolabrus tetricus)		Native	At least some invasive/non-native	Aquatic	Positive	Rapid increase in spiny lobster individual size following protection from fishing by MPAs. Larger individuals (>minimum legal size for catch) prey on native and the range-extending [invasive] sea urchins. The overall size distribution of the most abundant wrasse species didn't differ between inside and outside MPAs, although "there was some evidence that terminal phase males were larger inside MP…	Visual surveys
Overfishing reduces resilience of kelp beds to climate-driven catastrophic phase shift	INT-137-1	50c	Two no-take marine protected areas (established 12 and 31 years before experiment for the two different sites respectively)	Protection	Temperate oceans	Coastal/marine/freshwater	Australia	High income	Asia + Pacific	No conflict declared	Unclear		X				Detailed	X							Sur r	Ecosystem functioning and population dynamics	Survival rate	Animals	Animals	Just animals	Echinoidea		Long-spined sea urchin (Centrostephanus rodgersii)		Native invasive	At least some invasive/non-native	Aquatic	Positive	Estimated survival rate of long-spined sea urchins was significantly lower inside no-take MPAs, compared to fished reefs (mean proportion of population surviving in MPA = 0.094 pop/annum, Fished = 0.613 pop/annum, p = 0.004). This was attibuted to the higher abundance of large lopsters within MPAs, which were the main predator of the urchins. Reduced abundance of long-spined sea urchins was a pos…	Remote sensing & modelling
Development of Vegetation and Aquatic Habitat in Restored Riparian Sites of Californiaâ€™s North Coast Rangela	INT-139-1	51a	102 sites where riparian restoration has taken plae in California. "Site selection focused on projects with documented implementation dates in alluvial stream reaches of willow and mixed oak woodland vegetation with few trees present prior to project installation ... Surveyed project sites were primarily on second- and third-order streams with a range in project age from 4 to 39 years since resto…	Restoration	Streams, rivers, riparian	Coastal/marine/freshwater	United States of America	High income	North America	No conflict declared	Unclear		X				Detailed				Space for time (chronosequence)				Stem dens	Biomass	Individuals/ha	Plants	Plants	Plants & other		Trees & other plants	Woody vegetation, native/exotic trees, shrubs and vines		Mixed	At least some invasive/non-native	Aboveground	Mixed	In general, vegetation density (individuals/ha) increased over time in the restored areas (according to the chronosequence across sites). These relationships were as follows for different variables: Total woody vegetation: polynomial positive relationship with time (this was the only model here with a "relatively good fit", with R2=0.39) - the main objective ofthe revegetation efforts was to incr…	Visual surveys
Development of Vegetation and Aquatic Habitat in Restored Riparian Sites of Californiaâ€™s North Coast Rangela	INT-139-1	51b	102 sites where riparian restoration has taken plae in California. "Site selection focused on projects with documented implementation dates in alluvial stream reaches of willow and mixed oak woodland vegetation with few trees present prior to project installation ... Surveyed project sites were primarily on second- and third-order streams with a range in project age from 4 to 39 years since resto…	Restoration	Streams, rivers, riparian	Coastal/marine/freshwater	United States of America	High income	North America	No conflict declared	Unclear		X				Detailed				Space for time (chronosequence)				Cano	Biomass	Percentage canopy cover, and linear distance of riparian shade over the watercourse thalweg	Plants	Plants	Plants & other		Trees & other plants	Trees, other vegetation, litter, stones		Unclear	At least some invasive/non-native	Aboveground	Mixed	In general, absolute percentage cover increased over time in the restored areas. These relationships were as follows: Total canopy cover: polynomial positive relationship with time (R2=0.56) Native tree canopy: polynomial positive (R2=0.54) - the main objective of the revegetation efforts was to increase woody species abundance and diversity, so this indicates success. Ground cover (sum of litter…	Visual surveys
Development of Vegetation and Aquatic Habitat in Restored Riparian Sites of Californiaâ€™s North Coast Rangela	INT-139-1	51c	102 sites where riparian restoration has taken plae in California. "Site selection focused on projects with documented implementation dates in alluvial stream reaches of willow and mixed oak woodland vegetation with few trees present prior to project installation ... Surveyed project sites were primarily on second- and third-order streams with a range in project age from 4 to 39 years since resto…	Restoration	Streams, rivers, riparian	Coastal/marine/freshwater	United States of America	High income	North America	No conflict declared	Unclear		X				Detailed				Space for time (chronosequence)				Veg dens	Biomass	Percentage cover, disaggregated into types	Plants	Plants	Plants & other		Trees & grasses & other plants	Native/exotic perennial/annual grasses and forbs		Mixed	At least some invasive/non-native	Aboveground	Negative	Relative cover of native/exotic perennial grasses/forbs did not change significantly over time, whereas annual grasses forbs did have significant relationships with time: Annual grass: polynomial negative relationship with time (R2=0.28) Annual forb: polynomial negative (R2=0.30) The lack of longterm directional trend for native perennial grasses and forbs was contrary to expectation - the author…	Visual surveys
Development of Vegetation and Aquatic Habitat in Restored Riparian Sites of Californiaâ€™s North Coast Rangela	INT-139-1	51d	102 sites where riparian restoration has taken plae in California. "Site selection focused on projects with documented implementation dates in alluvial stream reaches of willow and mixed oak woodland vegetation with few trees present prior to project installation ... Surveyed project sites were primarily on second- and third-order streams with a range in project age from 4 to 39 years since resto…	Restoration	Streams, rivers, riparian	Coastal/marine/freshwater	United States of America	High income	North America	No conflict declared	Unclear		X				Detailed				Space for time (chronosequence)				Sp ri	Diversity		Plants	Plants	Plants & other		Trees & other plants	Trees, shrubs, vines, perennial/annual herbaceous plants		Unclear	At least some invasive/non-native	Aboveground	Positive	Species richness for different functional groups generally increased with age of restoration site. The relationships were as follows: Tree spp richness: positive polynomial relationship with time (R2=0.27) Shrub/vine richness: positive polynomial (R2=0.24) Perernnial herbaceous richness: positive polynomial (R2=0.14) Annual herbaveous richness: negative linear (R2=0.21)	Visual surveys
Development of Vegetation and Aquatic Habitat in Restored Riparian Sites of Californiaâ€™s North Coast Rangela	INT-139-1	51e	102 sites where riparian restoration has taken plae in California. "Site selection focused on projects with documented implementation dates in alluvial stream reaches of willow and mixed oak woodland vegetation with few trees present prior to project installation ... Surveyed project sites were primarily on second- and third-order streams with a range in project age from 4 to 39 years since resto…	Restoration	Streams, rivers, riparian	Coastal/marine/freshwater	United States of America	High income	North America	No conflict declared	Unclear		X				Detailed				Space for time (chronosequence)				Veg ext	Biomass	Pool habitat (%) and pool frequency	NA	Microorganisms, fungi & other	Plants & other			Water pools	X	NA	At least some invasive/non-native	Aquatic	Positive	Percentage pool habitat (methods cited from another study) had a positive polynomial relationship with time (R2=0.1). Pool frequency was not significantly related to time. The authors stated that "Improved pool habitat and depth indicate greater abundance and diversity of aquatic fauna may be able to use habitat at restored sites as complexity within the water column increased over time. Pools pr…	Visual surveys
Development of Vegetation and Aquatic Habitat in Restored Riparian Sites of Californiaâ€™s North Coast Rangela	INT-139-1	51f	102 sites where riparian restoration has taken plae in California. "Site selection focused on projects with documented implementation dates in alluvial stream reaches of willow and mixed oak woodland vegetation with few trees present prior to project installation ... Surveyed project sites were primarily on second- and third-order streams with a range in project age from 4 to 39 years since resto…	Restoration	Streams, rivers, riparian	Coastal/marine/freshwater	United States of America	High income	North America	No conflict declared	Unclear		X		X	Dobkin et al. 1998; White et al. 2005; Golet et al. 2008; USFWS 2002; Bulger et al. 2003; Golet et al. 2008	Detailed				Space for time (chronosequence)				H qual	Habitat quality	Habitat quality for named taxa	Plants	Plants	Plants & other		Trees			Unclear	At least some invasive/non-native	Aboveground	Positive	Increased canopy cover indicated "improved terrestrial habitat for birds (Dobkin et al. 1998; White et al. 2005; Golet et al. 2008), amphibians (USFWS 2002; Bulger et al. 2003), and various wildlife species (Golet et al. 2008)"	Visual surveys & secondary data
Effect the exclosure on plant diversity of the Hammada scoparia steppe in the Naama steppe courses (Algeria)	INT-142-1	52a	32 exclosure sites (or 18% of the "grazing courses" of the Wilaya (a province of Algeria), using fencing to eliminate human and animal disturbances. The eight sites most affected by desertification and silting were chosen for study.	Combination	Montane/Alpine	Other terrestrial	Algeria	Upper middle income	Africa	No conflict declared	Unclear		X				Absent				Space for time				Resil	Ecosystem functioning and population dynamics	"Recovery rate" - unclear how this was measured	Plants	Plants	Just plants		Other plants	Steppe plant species		Unclear	Unclear/partially unclear	Aboveground	Positive	Recovery rate was 40% in exclosures and 20% in control areas ("free courses") without exclosures. Unclear how the recovery rate was measured, but seems to be a measure of habitat quality: "The biological recovery is the set of inverse biological processes to those of the steppe and desertification. The recovery is characterized by the organic growth rate of perennial biomass recovery, the rate of…	Unclear
Effect the exclosure on plant diversity of the Hammada scoparia steppe in the Naama steppe courses (Algeria)	INT-142-1	52b	32 exclosure sites (or 18% of the "grazing courses" of the Wilaya (a province of Algeria), using fencing to eliminate human and animal disturbances. The eight sites most affected by desertification and silting were chosen for study.	Combination	Montane/Alpine	Other terrestrial	Algeria	Upper middle income	Africa	No conflict declared	Unclear		X				Detailed				Space for time				Sp ri	Diversity		Plants	Plants	Just plants		Grasses & other plants	E.g. Stipa parviflora, Vermiculata salsola, Anabasis articulata, Helianthemum lippii, Launaea nudicaullis		Unclear	Unclear/partially unclear	Aboveground	Positive	108 plant species were found in exclosures, compared to just 44 in control areas without exclosures.	Visual surveys
Effect the exclosure on plant diversity of the Hammada scoparia steppe in the Naama steppe courses (Algeria)	INT-142-1	52c	32 exclosure sites (or 18% of the "grazing courses" of the Wilaya (a province of Algeria), using fencing to eliminate human and animal disturbances. The eight sites most affected by desertification and silting were chosen for study.	Combination	Montane/Alpine	Other terrestrial	Algeria	Upper middle income	Africa	No conflict declared	Unclear		X				Detailed				Space for time				Gen ri	Diversity		Plants	Plants	Just plants		Grasses & other plants	Steppe plant species		Unclear	Unclear/partially unclear	Aboveground	Positive	84 plant genera in exclosures, compared to 37 genera in control areas.	Visual surveys
Effect the exclosure on plant diversity of the Hammada scoparia steppe in the Naama steppe courses (Algeria)	INT-142-1	52d	32 exclosure sites (or 18% of the "grazing courses" of the Wilaya (a province of Algeria), using fencing to eliminate human and animal disturbances. The eight sites most affected by desertification and silting were chosen for study.	Combination	Montane/Alpine	Other terrestrial	Algeria	Upper middle income	Africa	No conflict declared	Unclear		X				Detailed				Space for time				Fm+ ri	Diversity	Family richness	Plants	Plants	Just plants		Grasses & other plants	Steppe plant species		Unclear	Unclear/partially unclear	Aboveground	Positive	30 plant families in exclosures, compred to 18 families in the control area.	Visual surveys
Effect the exclosure on plant diversity of the Hammada scoparia steppe in the Naama steppe courses (Algeria)	INT-142-1	52e	32 exclosure sites (or 18% of the "grazing courses" of the Wilaya (a province of Algeria), using fencing to eliminate human and animal disturbances. The eight sites most affected by desertification and silting were chosen for study.	Combination	Montane/Alpine	Other terrestrial	Algeria	Upper middle income	Africa	No conflict declared	Unclear		X				Detailed				Space for time				Com c	Ecosystem composition		Plants	Plants	Just plants		Grasses & other plants	Plants split by life stragy type: Phanerophytes, Chamoephytes, HemiCryptophytes, Therophytes and Geophytes		Unclear	Unclear/partially unclear	Aboveground	Unclear	There was no apparent change in relative frequency of different plant strategy type between exclosures and controls. However, a change in composition is not tested, so the outcome direction is unclear.	Visual surveys
Effect the exclosure on plant diversity of the Hammada scoparia steppe in the Naama steppe courses (Algeria)	INT-142-1	52f	32 exclosure sites (or 18% of the "grazing courses" of the Wilaya (a province of Algeria), using fencing to eliminate human and animal disturbances. The eight sites most affected by desertification and silting were chosen for study.	Combination	Montane/Alpine	Other terrestrial	Algeria	Upper middle income	Africa	No conflict declared	Unclear		X				Detailed				Space for time				Tax pre	Ecosystem composition	Presence of endangered species and pasture species	Plants	Plants	Just plants		Grasses & other plants	Endangered vegetation, and pasture species e.g. Artemisia campestris, Artemisia herba-alba, Rhanterium suaveolens, Ephedra alata.		Unclear	Unclear/partially unclear	Aboveground	Positive	"Endangered vegetation" returned within exclosures, as did pasture species.	Visual surveys
Freshwater management and climate change adaptation: Experiences from the Great Ruaha River catchment in Tanzania	INT-145-1	53a	The conservation of headwaters riparian zones and restoration of springs and river flows (part of a broader Integrated River Basin Management project)	Combination	Streams, rivers, riparian	Coastal/marine/freshwater	United Republic of Tanzania	Low income	Africa	No conflict declared	Yes	Author(s) associated with intervention & funding		X			Detailed				Inferred historical baseline by interviewees				Per	Unspecified	Biodiveristy	NA	Microorganisms, fungi & other	Just plants			Unspecified biodiversity in riparian zones		Unclear	Unclear/partially unclear	NA	Positive	"The conservation of riparian zones and restor- ation of springs and river flows are of benefit to biodiversity." reported from qualitative study (focus group discussions, direct observation, unstructured interviews).	Qualitative primary data
Rangeland degradation and management approaches in Balochistan, Pakistan	INT-151-1	54a	Protected exclosures from livestock grazing in the context of rangeland management to reverse land degradation. "Studies were carried out to determine the potential of biological recovery of heavy grazed grasslands and shrub land by protecting the area from grazing."	Combination	Montane/Alpine	Other terrestrial	Pakistan	Lower middle income	Asia + Pacific	No conflict declared	Yes	Auth int funding					Detailed				Space for time				Veg dens	Biomass	Percentage cover	Plants	Plants	Just plants		Grasses & other plants	Vegetation in general; and Artemisia species, Haloxylon griffithii, Astragalus species, Cymbopogon jwarancusa, Chrysopogon aucheri, annuals, litter, rock and bare soil		Unclear	Unclear/partially unclear	Aboveground	Positive	Percentage vegetation cover was higher in the site protected from grazing than the grazed sites; this held for Cymbopogon jwarancusa, and for annual plants, but not for other species. The protected site also had lower bare soil cover, but higher litter cover. No statistical tests were done. [Check that comparison is rightly interpreted]	Visual surveys
Rangeland degradation and management approaches in Balochistan, Pakistan	INT-151-1	54b	Protected exclosures from livestock grazing in the context of rangeland management to reverse land degradation. "Studies were carried out to determine the potential of biological recovery of heavy grazed grasslands and shrub land by protecting the area from grazing."	Combination	Montane/Alpine	Other terrestrial	Pakistan	Lower middle income	Asia + Pacific	No conflict declared	Yes	Auth int funding					Detailed				Space for time				Biom	Biomass	Aboveground biomass; total and disaggregated into genera/species	Plants	Plants	Just plants		Grasses & other plants	Vegetation in general; and Artemisia species, Haloxylon griffithii, Astragalus species, Cymbopogon jwarancusa, Chrysopogon aucheri, annuals		Unclear	Unclear/partially unclear	Aboveground	Positive	Total aboveground biomass was higher at the protected site than the unprotected site in Ziarat province. Although total aboveground biomass was highest at an unprotected site, this was in a different distrivt (Kalat) and was to a high biomass of Artemisia species, which weren't even present in the district with the protected site. The protected site had the highest biomass of Cymbopogon jwarancus…	Visual surveys
Rangeland degradation and management approaches in Balochistan, Pakistan	INT-151-1	54c	Protected exclosures from livestock grazing in the context of rangeland management to reverse land degradation. "Studies were carried out to determine the potential of biological recovery of heavy grazed grasslands and shrub land by protecting the area from grazing."	Combination	Montane/Alpine	Other terrestrial	Pakistan	Lower middle income	Asia + Pacific	No conflict declared	Yes	Auth int funding					Detailed				Space for time				Biom	Biomass	Dry matter forage production	Plants	Plants	Just plants		Grasses & other plants	Cymbopogon jwarancusa, Chrysopogon aucheri at first site, Artemisia quettensis, Haloxylon griffithii at second site		Unclear	Unclear/partially unclear	Aboveground	Positive	Dry matter forage production higher in protected than grazed areas; at the first site in was 438kg/ha in the area protected from grazing, compared to just 88kg/ha at the grazed site. At the second site it was 320kg/ha at the protected site, compared to 199.68 at the grazed site.	Visual surveys
Rangeland degradation and management approaches in Balochistan, Pakistan	INT-151-1	54d	Protected exclosures from livestock grazing in the context of rangeland management to reverse land degradation. "Studies were carried out to determine the potential of biological recovery of heavy grazed grasslands and shrub land by protecting the area from grazing."	Combination	Montane/Alpine	Other terrestrial	Pakistan	Lower middle income	Asia + Pacific	No conflict declared	Yes	Auth int funding					Detailed	X							Biom	Biomass	Aboveground grass biomass production	Plants	Plants	Just plants		Grasses	Grasses: Cymbopogon jwarancusa, Chrysopogon aucheri		Unclear	Unclear/partially unclear	Aboveground	Positive	Biomass production was consistently higher inside than outside exclosures during the spring season, every year from 1996-2003. It also varied with rainfall.	Visual surveys
Impacts of species-led conservation on ecosystem services of wetlands: understanding co-benefits and tradeoffs	INT-157-1	55a	RSPB nature reserves: Of the 22 focal reserves (across Southeast and Eastern England), 20 were all or part Sites of Special Scientific Interest (SSSIs), 14 were all or part Special Protection Areas (SPAs), and two were all or part Special Areas of Conservation (SACs). The lowland wet grassland, reedbeds and fens at the 22 reserves are managed to benefit a range of species considered characteristi…	Protection	Wetlands	Other terrestrial	United Kingdom	High income	Europe	No conflict declared	No	Author(s) associated with intervention & funding	X		X	Annual count data from 1990 to 2009 for the target species on reserves, which are monitored using standard methodologies (O’Brien and Smith, 1992; Gilbert et al. 1998)	Detailed	X							Sp ab	Ecosystem composition	Population size	Animals	Animals	Animals, plants & other	Aves		Northern Lapwings, Common Redshank, Common Snipe, Great Bitterns		Native	Native	Aboveground	Positive	"Populations of Northern Lapwings, Common Redshank and Common Snipe all increased on land acquired and restored to wet grassland on the 22 focal reserves (Fig. 2a–c). These population increases are in contrast to large-scale declines that have taken place on lowland wet grassland elsewhere in lowland England over this period." "Numbers of Great Bitterns recorded at the focal reserves also increas…	Secondary data
Impacts of species-led conservation on ecosystem services of wetlands: understanding co-benefits and tradeoffs	INT-157-1	55b	RSPB nature reserves: Of the 22 focal reserves (across Southeast and Eastern England), 20 were all or part Sites of Special Scientific Interest (SSSIs), 14 were all or part Special Protection Areas (SPAs), and two were all or part Special Areas of Conservation (SACs). The lowland wet grassland, reedbeds and fens at the 22 reserves are managed to benefit a range of species considered characteristi…	Protection	Wetlands	Other terrestrial	United Kingdom	High income	Europe	No conflict declared	No	Author(s) associated with intervention & funding	X		X	English Nature (2010) Summary conditions for SSSI sites available at: http://www.english-nature. org.uk/special/sssi/reportAction.cfm?Report=sdrt15&Category=N&Reference=0	Poor detail				Meeting criteria			X	H qual	Habitat quality	Progress towards statutory favourable conservation status	Plants & NA	Plants, animals, & other	Animals, plants & other			Wetland habitats		NA	Native	Aboveground	Positive	"On land for which RSPB is responsible for delivering statutory favourable conservation status, government indicators also show that the objectives for each relevant feature are either being met or being moved towards" [Details of methods for this biodiv metric (habitat conservation status) could be found online or in the citation (which I couldn't open))]	Secondary data
Effects of establishing an artificial grassland on vegetation characteristics and soil quality in a degraded meadow	INT-160-1	56a	Restoration and revegetation of degraded alpine grasslands with cultivars of native species. Seed swere gradually planted on heavily degraded grassland with a series of agronomic measures, such as ploughing and harrowing, with diammonium phosphate serving as the basal fertilizer. The seeded grasslands were fertilized with urea at the jointing stage in the second year. Livestock was excluded from …	Restoration	Montane/Alpine	Other terrestrial	China	Upper middle income	Asia + Pacific	No conflict declared	Unclear		X				Detailed			X	Space for time				Sp ri	Diversity		Plants	Plants	Plants & other		Grasses & other plants	Kobresia, E. nutans, F. sinensis, Eragrostis cilianensis, and P. crymophila; and other plants		Unclear	Unclear/partially unclear	Aboveground	Positive	Species richness was significantly higher in the control (undisturbed native alpine meadow - i.e. restoration target), than the restored grassland areas, 4, 8, 9 and 14 years after seeding. The restored areas increased in species richness overtime, with year 9 being sig higher than year 4 and 7, and year 14 being sig higher than year 9. The restored area after 9 and 14 years also had a sig higher…	Visual surveys
Effects of establishing an artificial grassland on vegetation characteristics and soil quality in a degraded meadow	INT-160-1	56b	Restoration and revegetation of degraded alpine grasslands with cultivars of native species. Seed swere gradually planted on heavily degraded grassland with a series of agronomic measures, such as ploughing and harrowing, with diammonium phosphate serving as the basal fertilizer. The seeded grasslands were fertilized with urea at the jointing stage in the second year. Livestock was excluded from …	Restoration	Montane/Alpine	Other terrestrial	China	Upper middle income	Asia + Pacific	No conflict declared	Unclear		X				Detailed			X	Space for time				Sp di	Diversity	Shannon diversity index (a.k.a. Shannon-Wiener diversity index)	Plants	Plants	Plants & other		Grasses & other plants	Kobresia, E. nutans, F. sinensis, Eragrostis cilianensis, and P. crymophila; and other plants		Unclear	Unclear/partially unclear	Aboveground	Positive	Shannon-Wiener diversity index was sig higher in the pristine alpine site than restored areas, but sig higher in the 14 year old restored area than in younger restored areas and the heavily degraded area.	Visual surveys
Effects of establishing an artificial grassland on vegetation characteristics and soil quality in a degraded meadow	INT-160-1	56c	Restoration and revegetation of degraded alpine grasslands with cultivars of native species. Seed swere gradually planted on heavily degraded grassland with a series of agronomic measures, such as ploughing and harrowing, with diammonium phosphate serving as the basal fertilizer. The seeded grasslands were fertilized with urea at the jointing stage in the second year. Livestock was excluded from …	Restoration	Montane/Alpine	Other terrestrial	China	Upper middle income	Asia + Pacific	No conflict declared	Unclear		X				Detailed			X	Space for time				Biom	Biomass	Above- and belowground biomass	Plants	Plants	Plants & other		Grasses & other plants	Kobresia, E. nutans, F. sinensis, Eragrostis cilianensis, and P. crymophila; and other plants		Unclear	Unclear/partially unclear	Aboveground	Positive	Aboveground biomass was sig higher in restored plots than highly degraded plots (except in the 7th year). In the 4th year the restored sites had higher aboveground biomass than the control (undisturbed meadow), but the later years had sig lower biomass than the control. Aboveground biomass was also higher in the restored sites in all years than the highly degraded site. Belowground biomass was me…	Ex situ
Effects of establishing an artificial grassland on vegetation characteristics and soil quality in a degraded meadow	INT-160-1	56d	Restoration and revegetation of degraded alpine grasslands with cultivars of native species. Seed swere gradually planted on heavily degraded grassland with a series of agronomic measures, such as ploughing and harrowing, with diammonium phosphate serving as the basal fertilizer. The seeded grasslands were fertilized with urea at the jointing stage in the second year. Livestock was excluded from …	Restoration	Montane/Alpine	Other terrestrial	China	Upper middle income	Asia + Pacific	No conflict declared	Unclear		X				Detailed			X	Space for time				Com c	Ecosystem composition	Species proportions of biomass	Plants	Plants	Plants & other		Grasses & other plants	Kobresia, E. nutans, F. sinensis, Eragrostis cilianensis, and P. crymophila; and other plants		Unclear	Unclear/partially unclear	Aboveground	Unclear	Aboveground biomass was dominated by grasses at the 4-year old retoration site (84% of biomass was grass), compared to 11% at the heavily degraded site. However, grass biomass varied greatly between years, with 49% in year 9 and 40% in year 14. Legumes were only found in the control treatment (alpine grassland restoration target). Sedges were present in the restored sites after 14 years, and in t…	Ex situ
Effects of establishing an artificial grassland on vegetation characteristics and soil quality in a degraded meadow	INT-160-1	56e	Restoration and revegetation of degraded alpine grasslands with cultivars of native species. Seed swere gradually planted on heavily degraded grassland with a series of agronomic measures, such as ploughing and harrowing, with diammonium phosphate serving as the basal fertilizer. The seeded grasslands were fertilized with urea at the jointing stage in the second year. Livestock was excluded from …	Restoration	Montane/Alpine	Other terrestrial	China	Upper middle income	Asia + Pacific	No conflict declared	Unclear		X				Detailed			X	Space for time				Veg dens	Biomass	Percentage cover	Plants	Plants	Plants & other		Grasses & other plants	Kobresia, E. nutans, F. sinensis, Eragrostis cilianensis, and P. crymophila; and other plants		Unclear	Unclear/partially unclear	Aboveground	Positive	Vegetation percentage cover was sig higher in the restored sites in all years compared to the degraded site, and in one year didn't differ significantly from the control (target) site.	Visual surveys
Effects of establishing an artificial grassland on vegetation characteristics and soil quality in a degraded meadow	INT-160-1	56f	Restoration and revegetation of degraded alpine grasslands with cultivars of native species. Seed swere gradually planted on heavily degraded grassland with a series of agronomic measures, such as ploughing and harrowing, with diammonium phosphate serving as the basal fertilizer. The seeded grasslands were fertilized with urea at the jointing stage in the second year. Livestock was excluded from …	Restoration	Montane/Alpine	Other terrestrial	China	Upper middle income	Asia + Pacific	No conflict declared	Unclear		X				Detailed			X	Space for time				Age str	Ecosystem functioning and population dynamics	Vegetation height	Plants	Plants	Plants & other		Grasses & other plants	Kobresia, E. nutans, F. sinensis, Eragrostis cilianensis, and P. crymophila; and other plants		Unclear	Unclear/partially unclear	Aboveground	Positive	Vegetation height was sig higher in the restored sites in the 4th and 14th year compared to the degraded site, but didn't differ sig for the years 7 and 9; the 14th year did not differ sig from the control (target) site.	Visual surveys
Effects of establishing an artificial grassland on vegetation characteristics and soil quality in a degraded meadow	INT-160-1	56g	Restoration and revegetation of degraded alpine grasslands with cultivars of native species. Seed swere gradually planted on heavily degraded grassland with a series of agronomic measures, such as ploughing and harrowing, with diammonium phosphate serving as the basal fertilizer. The seeded grasslands were fertilized with urea at the jointing stage in the second year. Livestock was excluded from …	Restoration	Montane/Alpine	Other terrestrial	China	Upper middle income	Asia + Pacific	No conflict declared	Unclear		X				Detailed			X	Space for time				Biom	Biomass	Soil total organic carbon	NA	Microorganisms, fungi & other	Plants & other				X	Unclear	Unclear/partially unclear	Soil	Positive	Total organic carbon (TOC) in the soil highest in the control (target) site at the 0-10cm and 10-20cm depths, but not at 20-40cm depth. There was a general decrease in TOC from year 4 to year 7 in the restored sites, but it increased again over time, and TOC was sig higher in the restored site than the highly degraded site at all soil depths by 14 years after restoration.	Ex situ
Effects of establishing an artificial grassland on vegetation characteristics and soil quality in a degraded meadow	INT-160-1	56h	Restoration and revegetation of degraded alpine grasslands with cultivars of native species. Seed swere gradually planted on heavily degraded grassland with a series of agronomic measures, such as ploughing and harrowing, with diammonium phosphate serving as the basal fertilizer. The seeded grasslands were fertilized with urea at the jointing stage in the second year. Livestock was excluded from …	Restoration	Montane/Alpine	Other terrestrial	China	Upper middle income	Asia + Pacific	No conflict declared	Unclear		X				Detailed			X	Space for time				Biom	Biomass	Soil microbial biomass carbon	NA	Microorganisms, fungi & other	Plants & other			Microbes		Unclear	Unclear/partially unclear	Soil	Positive	Microbial biomass carbon (MBC) in the soil was sig higher in the control (target) than any of the restored sites for 0-10cm and 10-20cm depth, but not for 20-40cm depth. MBC generally increased in the restored sites betwene the 4th and 17th years after restoration, and by the 14th year, MBC was higher in the restored site than the highly degraded site at all depths.	Ex situ
Dominant plant species modulate responses to hydroseeding, irrigation and fertilization during the restoration of semiarid motorway slopes	INT-162-1	57a	Experimental testing of restoration technique on motorway embankments that were degraded. Restoration treatments were either fertilization (applied twice - a 20 g/m2 dose of a slow release N:P:K (16:11:11) inorganic fertilizer) or irrigation (conducted from March to June in both 2007 and 2008, coinciding with the peak growing season of annual plant communities characterizing the study sites; at a…	Restoration	Mediterranean shrubs and Forests	Terrestrial combination	Spain	High income	Europe	No conflict declared	Yes	Field experiment implemented by author(s)	X				Detailed	X							Veg dens	Biomass	Percentage cover	Plants	Plants	Just plants		Grasses & other plants	E.g. Bromus rubens, Medicago sativa, Anacyclus clavatus, Carduus tenuiflorus, Diplotaxis erucoides, and more		Unclear	Unclear/partially unclear	Aboveground	Positive	Plant cover was about 10% higher in irrigated plots, and varied between sites. Fertilisation didn't affect plant cover.	Visual surveys
Dominant plant species modulate responses to hydroseeding, irrigation and fertilization during the restoration of semiarid motorway slopes	INT-162-1	57b	Experimental testing of restoration technique on motorway embankments that were degraded. Restoration treatments were either fertilization (applied twice - a 20 g/m2 dose of a slow release N:P:K (16:11:11) inorganic fertilizer) or irrigation (conducted from March to June in both 2007 and 2008, coinciding with the peak growing season of annual plant communities characterizing the study sites; at a…	Restoration	Mediterranean shrubs and Forests	Terrestrial combination	Spain	High income	Europe	No conflict declared	Yes	Field experiment implemented by author(s)	X				Detailed	X							Sp di	Diversity	Shannon diversity index (a.k.a. Shannon-Wiener diversity index)	Plants	Plants	Just plants		Grasses & other plants	E.g. Bromus rubens, Medicago sativa, Anacyclus clavatus, Carduus tenuiflorus, Diplotaxis erucoides, and more		Unclear	Unclear/partially unclear	Aboveground	Positive	Fertilisation with NPK led to an increase in spp diversity in one case: at the embankment restoration sites at the second (of two) motorways in 2008, there was a sig interaction between site and fertilisation, due to a 67% increase in spp diverity under fertilisation at site 4.	Visual surveys
Dominant plant species modulate responses to hydroseeding, irrigation and fertilization during the restoration of semiarid motorway slopes	INT-162-1	57c	Experimental testing of restoration technique on motorway embankments that were degraded. Restoration treatments were either fertilization (applied twice - a 20 g/m2 dose of a slow release N:P:K (16:11:11) inorganic fertilizer) or irrigation (conducted from March to June in both 2007 and 2008, coinciding with the peak growing season of annual plant communities characterizing the study sites; at a…	Restoration	Mediterranean shrubs and Forests	Terrestrial combination	Spain	High income	Europe	No conflict declared	Yes	Field experiment implemented by author(s)	X				Detailed	X							Com c	Ecosystem composition		Plants	Plants	Just plants		Grasses & other plants	E.g. Bromus rubens, Medicago sativa, Anacyclus clavatus, Carduus tenuiflorus, Diplotaxis erucoides, and more		Unclear	Unclear/partially unclear	Aboveground	Unclear	The community composition of restoration sites was affected more by the pre-existing commnity and neighbours, than irrigation or fertilisation. At the embankment restoration sites at the first (of two) motorways, the dominant plant species was negatively correlated with plant diversity in 5 of the 6 situations evaluated (3 sites x 2 years). But the opposite pattern was found at the other motorway…	Visual surveys
Dominant plant species modulate responses to hydroseeding, irrigation and fertilization during the restoration of semiarid motorway slopes	INT-162-2	57.1a	Experimental testing of restoration technique on motorway embankments that were degraded. Used 'hydroseeding' - most of the species hydroseeded were highly competitive forage grass and legume species non-native to Spain, which is the norm in restoration projects in the Mediterranean Basin. The hydroseeding was tested with and without the other two factors (irrigation and fertilisation) described …	Created habitats	Created grassland	Other terrestrial	Spain	High income	Europe	No conflict declared	Yes	Field experiment implemented by author(s)	X				Detailed	X							Veg dens	Biomass	Percentage cover	Plants	Plants	Just plants		Grasses & other plants	Seeding was mostly of exotic species, such as Lolium multiflorum in 2007 and M. officinalis and M. arvensis in 2008 (see table 2 in paper for full list)		Mixed	At least some invasive/non-native	Aboveground	Positive	At the embankment restoration sites at the first (of two) motorways in 2007, hydroseeding increased total plant cover (per m2) by 10% [study says 'in 10%' but I think this is a mistake given the context]. This effect was mainly due to seeding level (according to post hoc tests) but disappeared when plots were also fertilised. This effect was not seen at the other motorway in 2007. At the second m…	Visual surveys
Dominant plant species modulate responses to hydroseeding, irrigation and fertilization during the restoration of semiarid motorway slopes	INT-162-2	57.1b	Experimental testing of restoration technique on motorway embankments that were degraded. Used 'hydroseeding' - most of the species hydroseeded were highly competitive forage grass and legume species non-native to Spain, which is the norm in restoration projects in the Mediterranean Basin. The hydroseeding was tested with and without the other two factors (irrigation and fertilisation) described …	Created habitats	Created grassland	Other terrestrial	Spain	High income	Europe	No conflict declared	Yes	Field experiment implemented by author(s)	X				Detailed	X							Sp di	Diversity	Shannon diversity index (a.k.a. Shannon-Wiener diversity index)	Plants	Plants	Just plants		Grasses & other plants	Seeding was mostly of exotic species, such as Lolium multiflorum in 2007 and M. officinalis and M. arvensis in 2009		Mixed	At least some invasive/non-native	Aboveground	Positive	At the embankment restoration sites at the first (of two) motorways in 2007, hydroseeding increased species diversity by 10%, mainly due to the effects of seeding level (control; seeding; seeding and mulch), according to post hoc tests. However, fertilisation reduced the postiive effect by 5%. Species diversity was also sig affected by site, which was due to the dominance of Carduus tenuiflorus a…	Visual surveys
Dominant plant species modulate responses to hydroseeding, irrigation and fertilization during the restoration of semiarid motorway slopes	INT-162-2	57.1c	Experimental testing of restoration technique on motorway embankments that were degraded. Used 'hydroseeding' - most of the species hydroseeded were highly competitive forage grass and legume species non-native to Spain, which is the norm in restoration projects in the Mediterranean Basin. The hydroseeding was tested with and without the other two factors (irrigation and fertilisation) described …	Created habitats	Created grassland	Other terrestrial	Spain	High income	Europe	No conflict declared	Yes	Field experiment implemented by author(s)	X				Detailed	X							Com c	Ecosystem composition		Plants	Plants	Just plants		Grasses & other plants	Seeding was mostly of exotic species, such as Lolium multiflorum in 2007 and M. officinalis and M. arvensis in 2010		Mixed	At least some invasive/non-native	Aboveground	Mixed	Hydroseeding in comes cases drove a shift in community composition, but not towards a more diverse community; instead it led to an increase in cover of hydroseeded species, most of which were exotic and came to dominate the community. The authors conclude that "therefore, hydroseeding can be considered of little value to restore semiarid roadside slopes". At the embankment restoration sites at th…	Visual surveys
Indigenous Use of Fire and Forest Loss in Canaima National Park, Venezuela. Assessment of and Tools for Alternative Strategies of Fire Management in PemoÌn Indigenous Lands	INT-164-1	58a	Simulated traditional Pemon fire management methods by burning a series of plots of open, treeless savanna (adjacent to evergreen gallergy forest patches) at different intervals (treatments) over a seven- year period. Burning in the last few metres of grassland before the beginning of forest. The idea is to prevent firest from entering forests by reducing the amount of combustible grasses near fo…	Management	Tropical and subtropical grasslands	Other terrestrial	Venezuela	Upper middle income	Latin America + Caribbean	No conflict declared	Yes	Author(s) associated with intervention	X				Poor detail			X					Biom	Biomass	Aboveground biomass	Plants	Plants	Just plants		Grasses & other plants	Dominated by grasses (Trachypogon spicatus (L.F.) Kuntze, Axonopus anceps (Mez) Hitch) and sedges (Lagenocarpus rigidus (Kunth) Nees, Bulbostylis paradoxa (Spreng.) Lindm); woody elements were virtually absent.		Unclear	Unclear/partially unclear	Aboveground	Unclear	Recovery of aboveground biomass in the four years after fire showed that biomass recovered to a biomass high enough to support a reburn by the third year after burning. The authors suggest that variable burning of savanna coul lead to a "variety of grassland envirnments as regards the amount of biomass (176– 1271 g/m2)" - i.e. a series of succession stages.	Ex situ
Indigenous Use of Fire and Forest Loss in Canaima National Park, Venezuela. Assessment of and Tools for Alternative Strategies of Fire Management in PemoÌn Indigenous Lands	INT-164-1	58b	Simulated traditional Pemon fire management methods by burning a series of plots of open, treeless savanna (adjacent to evergreen gallergy forest patches) at different intervals (treatments) over a seven- year period. Burning in the last few metres of grassland before the beginning of forest. The idea is to prevent firest from entering forests by reducing the amount of combustible grasses near fo…	Management	Tropical and subtropical grasslands	Other terrestrial	Venezuela	Upper middle income	Latin America + Caribbean	No conflict declared	Yes	Author(s) associated with intervention	X				Poor detail			X					Biom	Biomass	Dead:live ratio of aboveground biomass	Plants	Plants	Just plants		Grasses & other plants	Dominated by grasses (Trachypogon spicatus (L.F.) Kuntze, Axonopus anceps (Mez) Hitch) and sedges (Lagenocarpus rigidus (Kunth) Nees, Bulbostylis paradoxa (Spreng.) Lindm); woody elements were virtually absent.		Unclear	Unclear/partially unclear	Aboveground	Unclear	Dead:live ratio of aboveground biomass increased as the number of years since burning increased. The accumulation of dead material is proportional to risk of fire - high risk of fire is reach after 4 years since burning, and increases linearly up until 7 years since burning (when monitoring stopped).	Ex situ
Indigenous Use of Fire and Forest Loss in Canaima National Park, Venezuela. Assessment of and Tools for Alternative Strategies of Fire Management in PemoÌn Indigenous Lands	INT-164-1	58c	Simulated traditional Pemon fire management methods by burning a series of plots of open, treeless savanna (adjacent to evergreen gallergy forest patches) at different intervals (treatments) over a seven- year period. Burning in the last few metres of grassland before the beginning of forest. The idea is to prevent firest from entering forests by reducing the amount of combustible grasses near fo…	Management	Tropical and subtropical grasslands	Other terrestrial	Venezuela	Upper middle income	Latin America + Caribbean	No conflict declared	Yes	Author(s) associated with intervention	X				Poor detail					X			Sp di	Diversity	Specie diversity and composition	Plants	Plants	Just plants		Grasses & other plants	Dominated by grasses (Trachypogon spicatus (L.F.) Kuntze, Axonopus anceps (Mez) Hitch) and sedges (Lagenocarpus rigidus (Kunth) Nees, Bulbostylis paradoxa (Spreng.) Lindm); woody elements were virtually absent.		Unclear	Unclear/partially unclear	Aboveground	Unclear	The authors suggest that variable burning of savanna could lead to a "variety of grassland environments as regards ... biodiversity (species abundance and composition)" and that it can create "a series of succession stages" and "a diversity of vegetation physiognomies across the regional landscape". No results are reported for species abundance and composition.	Unclear
Indigenous Use of Fire and Forest Loss in Canaima National Park, Venezuela. Assessment of and Tools for Alternative Strategies of Fire Management in PemoÌn Indigenous Lands	INT-164-1	58d	Simulated traditional Pemon fire management methods by burning a series of plots of open, treeless savanna (adjacent to evergreen gallergy forest patches) at different intervals (treatments) over a seven- year period. Burning in the last few metres of grassland before the beginning of forest. The idea is to prevent firest from entering forests by reducing the amount of combustible grasses near fo…	Management	Tropical and subtropical grasslands	Other terrestrial	Venezuela	Upper middle income	Latin America + Caribbean	No conflict declared	Yes	Author(s) associated with intervention	x				Poor detail				Inferred comparison to absence of intervention				H qual	Habitat quality	Ecosystem protection from fire	Plants	Plants	Just plants		Trees & grasses & other plants	Gallery and terra-firme forest		Unclear	Unclear/partially unclear	Aboveground	Positive	Patch mosaic burning in the savanna "could assist in the conservation of other ecosystems, such as gallery and terra-firme forests. Thus, repeated fires in areas of savannas near to forest borders could be used to avoid large and catastrophic fires that spread from the savanna into forests, especially in very dry years. The application of this traditional practice would preserve the biodiversity …	Unclear
Impacts of forest cover change on ecosystem services in high Andean mountains	INT-174-1	59a	Exotic tree plantations - mostly pine plantations. "From the 1980s onwards, exotic tree species ... were increasingly used for plantation forests that now cover extensive areas". Planting of pine motivated by need for quick revenue for farmers, increase economic benefits from grassland landscapes. The government supports/incentivizes afforestation for carbon credit schemes. "While the ecological …	Created habitats	Created forest	Forest	Ecuador	Upper middle income	Latin America + Caribbean	No conflict declared	Unclear		X				Detailed			X					Frag	Landscape structure	Forest fragmentation	Plants	Plants	Plants & other		Trees	Pinus radiata and Pinus Petula		Non-native	At least some invasive/non-native	Aboveground	Unclear	Increase in fragmentation at the landscape scale due to clearing of native forests (not part of the focal intervention) and the creation of patches of pine plantations in high alpine open grasslands (the intervention). Unclear because non-native species.	Remote sensing
Impacts of forest cover change on ecosystem services in high Andean mountains	INT-174-1	59b	Exotic tree plantations - mostly pine plantations. "From the 1980s onwards, exotic tree species ... were increasingly used for plantation forests that now cover extensive areas". Planting of pine motivated by need for quick revenue for farmers, increase economic benefits from grassland landscapes. The government supports/incentivizes afforestation for carbon credit schemes. "While the ecological …	Created habitats	Created forest	Forest	Ecuador	Upper middle income	Latin America + Caribbean	No conflict declared	Unclear		X		X		Detailed			X					Sp di	Diversity	Shannon diversity index (a.k.a. Shannon-Wiener diversity index)	Plants	Plants	Plants & other		Trees & grasses & other plants	Pinus radiata and Pinus Petula		Mixed	At least some invasive/non-native	Aboveground	Mixed	Conversion from agricultural land to pine plantations led to the "landscape capacity" for biodiversity of floristic species increasing by 0.3 between 1991 and 2009; although this is a positive outcome, this was considerably lower than conversion from agriculture to naturally regenerating forest, which had an increase of 2.5. Also, it must be noted that the icnrease in landscape capcity is conside…	Secondary data
Impacts of forest cover change on ecosystem services in high Andean mountains	INT-174-1	59c	Exotic tree plantations - mostly pine plantations. "From the 1980s onwards, exotic tree species ... were increasingly used for plantation forests that now cover extensive areas". Planting of pine motivated by need for quick revenue for farmers, increase economic benefits from grassland landscapes. The government supports/incentivizes afforestation for carbon credit schemes. "While the ecological …	Created habitats	Created forest	Forest	Ecuador	Upper middle income	Latin America + Caribbean	No conflict declared	Unclear		X		X		Detailed				Stated change over time				Gro	Ecosystem functioning and population dynamics	Rate of natural regeneration	Plants	Plants	Plants & other		Trees & other plants	Pinus radiata and Pinus Petula		Non-native	At least some invasive/non-native	Aboveground	Mixed	Waste from pine tree harvesting (e.g. sawmill residue, trunks, branches) are often left on-site or in rivers, retarding the natural regeneration of vegetation at the site of pine plantations that are not replanted after harvesting. However, in some cases, pine plantations on agricultural land could improve the ability of degraded land to regenerate. "Low-density plantations of exotic trees allow …	Secondary data
Impacts of forest cover change on ecosystem services in high Andean mountains	INT-174-1	59d	Exotic tree plantations - mostly pine plantations. "From the 1980s onwards, exotic tree species ... were increasingly used for plantation forests that now cover extensive areas". Planting of pine motivated by need for quick revenue for farmers, increase economic benefits from grassland landscapes. The government supports/incentivizes afforestation for carbon credit schemes. "While the ecological …	Created habitats	Created forest	Forest	Ecuador	Upper middle income	Latin America + Caribbean	No conflict declared	Unclear		X		X		Detailed			X					Biom	Biomass	Soil organic matter	NA	Microorganisms, fungi & other	Plants & other				X	Unclear	At least some invasive/non-native	Soil	Negative	Soil organic matter decreased strongly in pine plantations planted on agricultural land (decrease of 0.6, compared to increase of 0.6 for natural regeneration on agricultural land).	Secondary data
Impacts of forest cover change on ecosystem services in high Andean mountains	INT-174-1	59e	Exotic tree plantations - mostly pine plantations. "From the 1980s onwards, exotic tree species ... were increasingly used for plantation forests that now cover extensive areas". Planting of pine motivated by need for quick revenue for farmers, increase economic benefits from grassland landscapes. The government supports/incentivizes afforestation for carbon credit schemes. "While the ecological …	Created habitats	Created forest	Forest	Ecuador	Upper middle income	Latin America + Caribbean	No conflict declared	Unclear		X		X		Detailed			X					Biom	Biomass	Aboveground biomass	Plants	Plants	Plants & other		Trees & other plants	Pinus radiata and Pinus Petula		Non-native	At least some invasive/non-native	Aboveground	Positive	Aboveground biomass increased by 3.2 for pine plantations on agricultural land, compared to a 0.9 increase for natural regeneration.	Secondary data
Litter quantity confers soil functional resilience through mediating soil biophysical habitat and microbial community structure on an eroded bare land restored with mono Pinus massoniana	INT-176-1	60a	In a monoculture of Pinus massoniana planted in 1987 on eroded bare land, a litter experiment was conducted to assess the effect of protecting or removing pine litter on soil properties, soil microbial community structure and functional stability. Some areas were protected from litter collection by farmers 1987-2005, others were not. This study was carried out on a restored site at the Ecological…	Created habitats	Created forest	Forest	China	Upper middle income	Asia + Pacific	No conflict declared	Yes	Field experiment implemented by author(s)	X				Detailed				Space for time				Lit	Biomass	Litter quantity	Plants	Plants	Plants & other		Other plants	Litter under Pinus massoniana plantation		Unclear	Unclear/partially unclear	Aboveground	Positive	Litter quantity per ha was consistently significantly higher in areas where litter had been protected, than in places where it had been removed (2-5x the quantity). This was after 18 years of some areas being protected and others not.	Ex situ
Litter quantity confers soil functional resilience through mediating soil biophysical habitat and microbial community structure on an eroded bare land restored with mono Pinus massoniana	INT-176-1	60b	In a monoculture of Pinus massoniana planted in 1987 on eroded bare land, a litter experiment was conducted to assess the effect of protecting or removing pine litter on soil properties, soil microbial community structure and functional stability. Some areas were protected from litter collection by farmers 1987-2005, others were not. This study was carried out on a restored site at the Ecological…	Created habitats	Created forest	Forest	China	Upper middle income	Asia + Pacific	No conflict declared	Yes	Field experiment implemented by author(s)	X				Detailed				Space for time				Biom	Biomass	Soil organic carbon	NA	Microorganisms, fungi & other	Plants & other				X	Unclear	Unclear/partially unclear	Soil	Positive	Soil organic carbon was in most cases sig higher in the areas with protected litter. (In all but the middle slope areas at 0-50mm depth.)	Ex situ
Litter quantity confers soil functional resilience through mediating soil biophysical habitat and microbial community structure on an eroded bare land restored with mono Pinus massoniana	INT-176-1	60c	In a monoculture of Pinus massoniana planted in 1987 on eroded bare land, a litter experiment was conducted to assess the effect of protecting or removing pine litter on soil properties, soil microbial community structure and functional stability. Some areas were protected from litter collection by farmers 1987-2005, others were not. This study was carried out on a restored site at the Ecological…	Created habitats	Created forest	Forest	China	Upper middle income	Asia + Pacific	No conflict declared	Yes	Field experiment implemented by author(s)	X				Detailed				Space for time				Biom	Biomass	Soil microbial biomass carbon	Microbes (general)	Microorganisms, fungi & other	Plants & other			Soil microbiota		Unclear	Unclear/partially unclear	Soil	Positive	Soil microbial biomass carbon was in most cases sig higher in areas which had been protected form litter collection. (In all but the middle slope areas at 0-50mm depth, where it was lower in protected areas, and in one other area where it was higher but non significantly)	Ex situ
Litter quantity confers soil functional resilience through mediating soil biophysical habitat and microbial community structure on an eroded bare land restored with mono Pinus massoniana	INT-176-1	60d	In a monoculture of Pinus massoniana planted in 1987 on eroded bare land, a litter experiment was conducted to assess the effect of protecting or removing pine litter on soil properties, soil microbial community structure and functional stability. Some areas were protected from litter collection by farmers 1987-2005, others were not. This study was carried out on a restored site at the Ecological…	Created habitats	Created forest	Forest	China	Upper middle income	Asia + Pacific	No conflict declared	Yes	Field experiment implemented by author(s)	X				Detailed				Space for time				Sp ab	Ecosystem composition	Phospholipid fatty acid (PLFA) quantity	Microbes (general)	Microorganisms, fungi & other	Plants & other			Soil microbiota; PLFAs from plants were also picked up, but not included in this specific analysis		Unclear	Unclear/partially unclear	Soil	Positive	Litter protection increased total PLFAs and all the subgroups of PLFA in the 0-100 mm depth at the hilltop and in the 50-100 mm depth at the foot slope, and only Gram positive bacteria PLFAs in the 50-100mm depth at the middle slope.	Ex situ
Litter quantity confers soil functional resilience through mediating soil biophysical habitat and microbial community structure on an eroded bare land restored with mono Pinus massoniana	INT-176-1	60e	In a monoculture of Pinus massoniana planted in 1987 on eroded bare land, a litter experiment was conducted to assess the effect of protecting or removing pine litter on soil properties, soil microbial community structure and functional stability. Some areas were protected from litter collection by farmers 1987-2005, others were not. This study was carried out on a restored site at the Ecological…	Created habitats	Created forest	Forest	China	Upper middle income	Asia + Pacific	No conflict declared	Yes	Field experiment implemented by author(s)	X				Detailed				Space for time				Com c	Ecosystem composition	Phospholipid fatty acid (PLFA) identities	Microbes (general)	Microorganisms, fungi & other	Plants & other			Soil microbiota; PLFAs from plants were also picked up, but not included in this specific analysis		Unclear	Unclear/partially unclear	Soil	Unclear	A principle component analysis of PFLA profiles showed that there was a significant effect of litter management, soil depth and their interactions on a subset of the PFLAs identified. "Increasing litter input, associating the improvement of soil organic matter and soil structure, has explained 46% of total variance of soil microbial community structure". These changes led to increased resilience …	Ex situ
Litter quantity confers soil functional resilience through mediating soil biophysical habitat and microbial community structure on an eroded bare land restored with mono Pinus massoniana	INT-176-1	60f	In a monoculture of Pinus massoniana planted in 1987 on eroded bare land, a litter experiment was conducted to assess the effect of protecting or removing pine litter on soil properties, soil microbial community structure and functional stability. Some areas were protected from litter collection by farmers 1987-2005, others were not. This study was carried out on a restored site at the Ecological…	Created habitats	Created forest	Forest	China	Upper middle income	Asia + Pacific	No conflict declared	Yes	Field experiment implemented by author(s)	X				Detailed				Space for time				Com c	Ecosystem composition	Community-level physiological profiles (CLPP) of soil and microbial communities	Microbes (general)	Microorganisms, fungi & other	Plants & other			Soil microbiota		Unclear	Unclear/partially unclear	Soil	Unclear	There was a sig effect of litter management on PC1, and slope position and its interaction with litter management in PC2, in the PCA on CLPP of soil and microbial communities.	Ex situ
Litter quantity confers soil functional resilience through mediating soil biophysical habitat and microbial community structure on an eroded bare land restored with mono Pinus massoniana	INT-176-1	60g	In a monoculture of Pinus massoniana planted in 1987 on eroded bare land, a litter experiment was conducted to assess the effect of protecting or removing pine litter on soil properties, soil microbial community structure and functional stability. Some areas were protected from litter collection by farmers 1987-2005, others were not. This study was carried out on a restored site at the Ecological…	Created habitats	Created forest	Forest	China	Upper middle income	Asia + Pacific	No conflict declared	Yes	Field experiment implemented by author(s)	X				Detailed				Space for time				Fun di	Diversity	Shannon diversity index (a.k.a. Shannon-Wiener diversity index) for microbial functional diversity	Microbes (general)	Microorganisms, fungi & other	Plants & other			Soil microbiota		Unclear	Unclear/partially unclear	Soil	Positive	Shannon diversity index was significantly higher at litter protection than removal sites in 3/6 cases (soil depth and slope position combinations). In 2 of the remaining 3, it was non-sig higher in protected sites. Shannon index was positively correlaetd with "concentration of soil organic carbon and total nitrogen, aggregate stability, bacterial: fungal PLFAs (or reciprocal of SMB- C:N)" Microbi…	Ex situ
Litter quantity confers soil functional resilience through mediating soil biophysical habitat and microbial community structure on an eroded bare land restored with mono Pinus massoniana	INT-176-1	60h	In a monoculture of Pinus massoniana planted in 1987 on eroded bare land, a litter experiment was conducted to assess the effect of protecting or removing pine litter on soil properties, soil microbial community structure and functional stability. Some areas were protected from litter collection by farmers 1987-2005, others were not. This study was carried out on a restored site at the Ecological…	Created habitats	Created forest	Forest	China	Upper middle income	Asia + Pacific	No conflict declared	Yes	Field experiment implemented by author(s)	X				Detailed				Space for time				Fun di	Diversity	Simpson's diversity index for microbial functional diversity	Microbes (general)	Microorganisms, fungi & other	Plants & other			Soil microbiota		Unclear	Unclear/partially unclear	Soil	Mixed	Simpson diversity index was sig higher at litter protection sites in 1/6 cases (soil depth and slope position combinations), and was sig lower in 3/6 cases. Simpson index was negatively correlaetd with "concentration of soil organic carbon and total nitrogen, aggregate stability, bacterial: fungal PLFAs (or reciprocal of SMB- C:N)"	Ex situ
Litter quantity confers soil functional resilience through mediating soil biophysical habitat and microbial community structure on an eroded bare land restored with mono Pinus massoniana	INT-176-1	60i	In a monoculture of Pinus massoniana planted in 1987 on eroded bare land, a litter experiment was conducted to assess the effect of protecting or removing pine litter on soil properties, soil microbial community structure and functional stability. Some areas were protected from litter collection by farmers 1987-2005, others were not. This study was carried out on a restored site at the Ecological…	Created habitats	Created forest	Forest	China	Upper middle income	Asia + Pacific	No conflict declared	Yes	Field experiment implemented by author(s)	X				Detailed				Space for time				Fun di	Diversity	McIntosh diversity index for microbial functional diversity	Microbes (general)	Microorganisms, fungi & other	Plants & other			Soil microbiota		Unclear	Unclear/partially unclear	Soil	Positive	McIntosh diversity index was sig higher at litter protection sites in 3/6 cases. McIntosh index was positively correlaetd with "concentration of soil organic carbon and total nitrogen, aggregate stability, bacterial: fungal PLFAs (or reciprocal of SMB- C:N)"	Ex situ
Litter quantity confers soil functional resilience through mediating soil biophysical habitat and microbial community structure on an eroded bare land restored with mono Pinus massoniana	INT-176-1	60j	In a monoculture of Pinus massoniana planted in 1987 on eroded bare land, a litter experiment was conducted to assess the effect of protecting or removing pine litter on soil properties, soil microbial community structure and functional stability. Some areas were protected from litter collection by farmers 1987-2005, others were not. This study was carried out on a restored site at the Ecological…	Created habitats	Created forest	Forest	China	Upper middle income	Asia + Pacific	No conflict declared	Yes	Field experiment implemented by author(s)	X				Detailed				Space for time				Resis	Ecosystem functioning and population dynamics	Resistance to heating and copper addition	Microbes (general)	Microorganisms, fungi & other	Plants & other			Soil microbiota		Unclear	Unclear/partially unclear	Soil	Positive	Resistance following heat perturbation was sig correlated ith most microbial divesity indices, whilst only Shannon index was sig orrelated with resistance following copper perturbation. There was an interactive effect among perturbation type, slope position and litter management on soil functional resistance. E.g. resistance was smaller following heat than ollowing copper pertubration, especially…	Ex situ
Litter quantity confers soil functional resilience through mediating soil biophysical habitat and microbial community structure on an eroded bare land restored with mono Pinus massoniana	INT-176-1	60k	In a monoculture of Pinus massoniana planted in 1987 on eroded bare land, a litter experiment was conducted to assess the effect of protecting or removing pine litter on soil properties, soil microbial community structure and functional stability. Some areas were protected from litter collection by farmers 1987-2005, others were not. This study was carried out on a restored site at the Ecological…	Created habitats	Created forest	Forest	China	Upper middle income	Asia + Pacific	No conflict declared	Yes	Field experiment implemented by author(s)	X				Detailed				Space for time				Resil	Ecosystem functioning and population dynamics	Resilience to heating and copper addition	Microbes (general)	Microorganisms, fungi & other	Plants & other			Soil microbiota		Unclear	Unclear/partially unclear	Soil	Positive	Resilience following both heat and copper perturbation was gi correlated with litter quantity (and hence litter protection). Most microbial diversity indices were correlated with resilience following heat perturbation. See more detail on resilience and resistance results in the study (relationship with PLFA profiles, PCA components etc.). There was an interactive effect among perturbation type, s…	Ex situ
Trading Natural Riparian Forests for Urban Shelterbelt Plantations—A Sustainability Assessment of the Kökyar Protection Forest in NWChina	INT-177-1	61a	As a response to the dust problems, in the 1980s the local authorities decided to lay out a peri-urban shelterbelt plantation, called Kökyar Protection Forest. Work began in 1986 and was completed in 1990, the plantation then covering an area of 1308 ha [2]. From 1990 onward, the project was extended by three more project periods, each of which converted more patches of desert land into forest pl…	Created habitats	Created forest	Forest	China	Upper middle income	Asia + Pacific	No conflict declared	No		X		X		Detailed				Implied scenario in absence of intervention				Com c	Ecosystem composition	Dominance of non-native species	Plants	Plants	Plants, animals & other		Trees & other plants	Mainly non-native tree species		Mixed	At least some invasive/non-native	Aboveground	Negative	Replacement of 3842ha of native eocsystem (sparsely vegetation with camelthorn (Alhagi pseudalhagi) and other minor herbaceous species) with planed non-native tree species. "A natural ecosystem was exchanged by an artificial ecosystem, which implicates a deterioration of the natural environment. Fortunately, the desert ecosystem that was replaced by the artificial plantation is abundant in Xinjia…	Secondary data
Trading Natural Riparian Forests for Urban Shelterbelt Plantations—A Sustainability Assessment of the Kökyar Protection Forest in NWChina	INT-177-1	61b	As a response to the dust problems, in the 1980s the local authorities decided to lay out a peri-urban shelterbelt plantation, called Kökyar Protection Forest. Work began in 1986 and was completed in 1990, the plantation then covering an area of 1308 ha [2]. From 1990 onward, the project was extended by three more project periods, each of which converted more patches of desert land into forest pl…	Created habitats	Created forest	Forest	China	Upper middle income	Asia + Pacific	No conflict declared	No		X		X	Used secondary data to calculate forest water use	Detailed				Implied scenario in absence of intervention				H qual	Habitat quality	Water deprivation leading to desertification	NA	Microorganisms, fungi & other	Plants, animals & other		Trees & other plants	Tugai forests	X	Native	At least some invasive/non-native	Aboveground	Negative	The Kökyar Protection Forest (white poplar and orchards) consumes about 35 million m3 of irrigation water, which is taken from local rivers, depriving downstream areas of water - the natural Tugai forests at the middle and lower reaches of the Tarim river are hence deprived of 35 million m3 of water/year. This has resulted in desiccation and desertificaiton (forest loss) of 8023 ha of Euphrates p…	Secondary data
Trading Natural Riparian Forests for Urban Shelterbelt Plantations—A Sustainability Assessment of the Kökyar Protection Forest in NWChina	INT-177-1	61c	As a response to the dust problems, in the 1980s the local authorities decided to lay out a peri-urban shelterbelt plantation, called Kökyar Protection Forest. Work began in 1986 and was completed in 1990, the plantation then covering an area of 1308 ha [2]. From 1990 onward, the project was extended by three more project periods, each of which converted more patches of desert land into forest pl…	Created habitats	Created forest	Forest	China	Upper middle income	Asia + Pacific	No conflict declared	No		X		X		Detailed				Implied scenario in absence of intervention				Con stat	Conservation status	Habitat loss threatening species and ecosystem survival	Animals & plants	Plants, animals, & other	Plants, animals & other		Trees & other plants	Euphrates poplar forests; animal species; other species		Unclear	At least some invasive/non-native	Aboveground	Negative	Loss of 8023ha of Euphrates poplar forest due to water deprivation, decreases the size of a rare habiat type, and the species which rely on it: "Single species and the ecosystem type as a whole are pushed one step closer towards extinction"	Secondary data
Rehabilitation of a debris-flow prone mountain stream in southwestern China â€“ Strategies, effects and implications	INT-180-1	62a	Rehabilitation of a creek in China, which is debris prone. The issue is primarily anthropogenic in nature but it is driven also by climatic factors (i.e. the landslides/erosion risk is both anthropogenic and climatic). As a whole the intervention integrated a variety of engineering, biological, and social intervention. In areas subjected to serious gully erosion, small and medium-sized check dams…	Created habitats	Created forest	Forest	China	Upper middle income	Asia + Pacific	No conflict declared	No		X				Detailed				Space for time				Sp ri	Diversity		Animals	Animals	Animals, plants & other	Arachnida, clitellata, gastropoda, insecta, malacostraca, rhabditophora		Benthic macroinvertebrates; amphipoda, diptera, trichoptera, odonata, ephemaroptera, plecoptera, coleoptera, acariformers, gastropoda, ologochaeta, hirudinea, tricladida		Unclear	At least some invasive/non-native	Aquatic	Positive	Species richness of benthic macroinvertebrates was 28 for the restored creek in both 2005 and 2007, compared to 8 and 1 in the first control creek, and zero and zero in the second control creek. restoration was initiated in the late 1970s, so these measurements were taken after a few decades for macrobenthic community to develop - however, we don't have a historical baseline condition to compare …	Visual surveys
Rehabilitation of a debris-flow prone mountain stream in southwestern China â€“ Strategies, effects and implications	INT-180-1	62b	Rehabilitation of a creek in China, which is debris prone. The issue is primarily anthropogenic in nature but it is driven also by climatic factors (i.e. the landslides/erosion risk is both anthropogenic and climatic). As a whole the intervention integrated a variety of engineering, biological, and social intervention. In areas subjected to serious gully erosion, small and medium-sized check dams…	Created habitats	Created forest	Forest	China	Upper middle income	Asia + Pacific	No conflict declared	No		X				Detailed				Space for time				O	Ecosystem composition	Taxon density: number of benthic organisms per unit area	Animals	Animals	Animals, plants & other	Arachnida, clitellata, gastropoda, insecta, malacostraca, rhabditophora		Benthic macroinvertebrates; amphipoda, diptera, trichoptera, odonata, ephemaroptera, plecoptera, coleoptera, acariformers, gastropoda, ologochaeta, hirudinea, tricladida		Unclear	At least some invasive/non-native	Aquatic	Positive	Across taxa, the number of benthic macroinvertebrates per unit area was consistently higher in the restored creek than in controls.	Visual surveys
Rehabilitation of a debris-flow prone mountain stream in southwestern China â€“ Strategies, effects and implications	INT-180-1	62c	Rehabilitation of a creek in China, which is debris prone. The issue is primarily anthropogenic in nature but it is driven also by climatic factors (i.e. the landslides/erosion risk is both anthropogenic and climatic). As a whole the intervention integrated a variety of engineering, biological, and social intervention. In areas subjected to serious gully erosion, small and medium-sized check dams…	Created habitats	Created forest	Forest	China	Upper middle income	Asia + Pacific	No conflict declared	No		X				Detailed				Space for time				Sp di	Diversity	Shannon diversity index (a.k.a. Shannon-Wiener diversity index)	Animals	Animals	Animals, plants & other	Arachnida, clitellata, gastropoda, insecta, malacostraca, rhabditophora		Benthic macroinvertebrates; amphipoda, diptera, trichoptera, odonata, ephemaroptera, plecoptera, coleoptera, acariformers, gastropoda, ologochaeta, hirudinea, tricladida		Unclear	At least some invasive/non-native	Aquatic	Positive	Shannon-Wiener index (referred to as Shannon-Weaver in paper, but it is the same index) was consistently higher in the restored creek than in controls (2.42 in 2005, 1.92 in 2007, compared to 1.79 in 2005 and 0 in 2007 in the first control creek, and 0 in both years in the second control creek)	Visual surveys
Rehabilitation of a debris-flow prone mountain stream in southwestern China â€“ Strategies, effects and implications	INT-180-1	62d	Rehabilitation of a creek in China, which is debris prone. The issue is primarily anthropogenic in nature but it is driven also by climatic factors (i.e. the landslides/erosion risk is both anthropogenic and climatic). As a whole the intervention integrated a variety of engineering, biological, and social intervention. In areas subjected to serious gully erosion, small and medium-sized check dams…	Created habitats	Created forest	Forest	China	Upper middle income	Asia + Pacific	No conflict declared	No		X				Detailed				Space for time				Sp di	Diversity	Modified Shannon-Weiner diversity index B, which is like S-W index but factors in the total abundance of individuals by multiplying S-W index by ln(N). So, B = H.Ln(N) = -ln(N)[sum of]Pi(ln(Pi)) where Pi is proportion of species i in the sample.	Animals	Animals	Animals, plants & other	Arachnida, clitellata, gastropoda, insecta, malacostraca, rhabditophora		Benthic macroinvertebrates; amphipoda, diptera, trichoptera, odonata, ephemaroptera, plecoptera, coleoptera, acariformers, gastropoda, ologochaeta, hirudinea, tricladida		Unclear	At least some invasive/non-native	Aquatic	Positive	Bio-community index (total abundance of the bio-community) was higher in the restored creek than controls. 10.83-14.49 in the restored creek, compared to -0.29-0 in the control creeks. Modified Shannon-Wiener diversity index reflects taxa information about the total abundance of the bio-community.	Visual surveys
Rehabilitation of a debris-flow prone mountain stream in southwestern China â€“ Strategies, effects and implications	INT-180-1	62e	Rehabilitation of a creek in China, which is debris prone. The issue is primarily anthropogenic in nature but it is driven also by climatic factors (i.e. the landslides/erosion risk is both anthropogenic and climatic). As a whole the intervention integrated a variety of engineering, biological, and social intervention. In areas subjected to serious gully erosion, small and medium-sized check dams…	Created habitats	Created forest	Forest	China	Upper middle income	Asia + Pacific	No conflict declared	No		X				Detailed				Space for time				Biom	Biomass	Biomass per unit area	Animals	Animals	Animals, plants & other	Arachnida, clitellata, gastropoda, insecta, malacostraca, rhabditophora		Benthic macroinvertebrates; amphipoda, diptera, trichoptera, odonata, ephemaroptera, plecoptera, coleoptera, acariformers, gastropoda, ologochaeta, hirudinea, tricladida		Unclear	At least some invasive/non-native	Aquatic	Positive	Biomass of benthic macroinvertebrates per unit area was 6.4–8.8 g/m2 in the creek with the intervention; this was over 800x higher than in one control creek; the other control creek had no benthic macroinvertebrates.	Visual surveys
Rehabilitation of a debris-flow prone mountain stream in southwestern China â€“ Strategies, effects and implications	INT-180-1	62f	Rehabilitation of a creek in China, which is debris prone. The issue is primarily anthropogenic in nature but it is driven also by climatic factors (i.e. the landslides/erosion risk is both anthropogenic and climatic). As a whole the intervention integrated a variety of engineering, biological, and social intervention. In areas subjected to serious gully erosion, small and medium-sized check dams…	Created habitats	Created forest	Forest	China	Upper middle income	Asia + Pacific	No conflict declared	No		X				Detailed				Space for time				Veg dens	Biomass	Percentage cover	Plants	Plants	Animals, plants & other		Trees & other plants	Main planted shrub was Leucaena leucocephala (non-native); other trees, shrubs, herbs		Mixed	At least some invasive/non-native	Aboveground	Positive	10 years after restoration began, vegetation coverage was 80% in the basin.	Visual surveys
Rehabilitation of a debris-flow prone mountain stream in southwestern China â€“ Strategies, effects and implications	INT-180-1	62g	Rehabilitation of a creek in China, which is debris prone. The issue is primarily anthropogenic in nature but it is driven also by climatic factors (i.e. the landslides/erosion risk is both anthropogenic and climatic). As a whole the intervention integrated a variety of engineering, biological, and social intervention. In areas subjected to serious gully erosion, small and medium-sized check dams…	Created habitats	Created forest	Forest	China	Upper middle income	Asia + Pacific	No conflict declared	No		X				Detailed				Space for time				Tax pre	Ecosystem composition	Presence of plant types	Plants	Plants	Animals, plants & other		Trees & other plants	Main planted shrub was Leucaena leucocephala (non-native); other trees, shrubs, herbs		Mixed	At least some invasive/non-native	Aboveground	Mixed	Tree, shrub and herb layers formed within 10 years after restoration began.	Visual surveys
Rehabilitation of a debris-flow prone mountain stream in southwestern China â€“ Strategies, effects and implications	INT-180-1	62h	Rehabilitation of a creek in China, which is debris prone. The issue is primarily anthropogenic in nature but it is driven also by climatic factors (i.e. the landslides/erosion risk is both anthropogenic and climatic). As a whole the intervention integrated a variety of engineering, biological, and social intervention. In areas subjected to serious gully erosion, small and medium-sized check dams…	Created habitats	Created forest	Forest	China	Upper middle income	Asia + Pacific	No conflict declared	No		X				Poor detail					X			Tax pre	Ecosystem composition	Invasive species	Plants	Plants	Animals, plants & other		Trees & other plants	Main planted shrub was Leucaena leucocephala (non-native)		Non-native	At least some invasive/non-native	Aboveground	Unclear	The main planted speices - Leucaena leucocephala - a drought-tolerant, fast-growing and highly adaptive plant species, is "considered to be one of the 100 worst invasive species (http://www.invasivespecies.net/)". However, there was also evidence that this species brought better erosion control than alternative shrubs. Hence, the overall ecological effect of this species is unclear.	Visual surveys
Rehabilitation of a debris-flow prone mountain stream in southwestern China â€“ Strategies, effects and implications	INT-180-1	62i	Rehabilitation of a creek in China, which is debris prone. The issue is primarily anthropogenic in nature but it is driven also by climatic factors (i.e. the landslides/erosion risk is both anthropogenic and climatic). As a whole the intervention integrated a variety of engineering, biological, and social intervention. In areas subjected to serious gully erosion, small and medium-sized check dams…	Created habitats	Created forest	Forest	China	Upper middle income	Asia + Pacific	No conflict declared	No		X				Detailed				Space for time				H qual	Habitat quality	Presence of step-pool system	NA	Microorganisms, fungi & other	Animals, plants & other			Watercourse; pools and river	X	NA	At least some invasive/non-native	Aquatic	Positive	The creek with restoration interventions developed a "step-pool system", which the control creeks lacked. These pools increase the bed roughness and flow resistance, reduced sediment load, and aiding proliferation of the macrobenthic invertebrate communities.	Visual surveys
Rehabilitation of a debris-flow prone mountain stream in southwestern China â€“ Strategies, effects and implications	INT-180-1	62j	Rehabilitation of a creek in China, which is debris prone. The issue is primarily anthropogenic in nature but it is driven also by climatic factors (i.e. the landslides/erosion risk is both anthropogenic and climatic). As a whole the intervention integrated a variety of engineering, biological, and social intervention. In areas subjected to serious gully erosion, small and medium-sized check dams…	Created habitats	Created forest	Forest	China	Upper middle income	Asia + Pacific	No conflict declared	No		X				Detailed				Space for time				Hab di	Diversity	Habitat diversity	NA	Microorganisms, fungi & other	Animals, plants & other			Watercourse; pools and river	X	NA	At least some invasive/non-native	Aquatic	Positive	Habitat diversity was much higher for the creek with restoration than the control creeks, because the steps and pools create high and low velocity zones, shallow and mid-depth water, and different substrates at different places.	Visual surveys
Integrated valuation of a nature-based solution for water pollution control. Highlighting hidden benefits	INT-183-1	63a	The Gorla Maggiore water park, called here the green infrastructure. The water park is a constructed ecosystem of about 9 ha built on the Olona River bank during 2011-2012. It includes (a) a pollutant removal area composed of a grid, a sedimentation tank and four vertical sub-surface flow constructed wetlands; (b) a multipurpose area with a surface flow constructed wetland or pond with multiple r…	Created habitats	Created wetland	Other terrestrial	Italy	High income	Europe	No conflict declared	Unclear		X				Detailed				Comparison with grey infrastructure and poplar plantation		X		Hab di	Diversity	Landscape diveristy - Shannon's diversity index, at landscape scale	Plants & NA	Plants, animals, & other	Animals, plants & other		Trees & other plants	Riparian trees, green open space		Unclear	Unclear/partially unclear	Aboveground	Positive	Landscape diversity (Shannon's diversity index of the habitats) was higher in the green infrastructure project (index = 2) compared to the two alternatives - poplar (1.89) and grey infrastructure (the control) (1.85).	Remote sensing
Integrated valuation of a nature-based solution for water pollution control. Highlighting hidden benefits	INT-183-1	63b	The Gorla Maggiore water park, called here the green infrastructure. The water park is a constructed ecosystem of about 9 ha built on the Olona River bank during 2011-2012. It includes (a) a pollutant removal area composed of a grid, a sedimentation tank and four vertical sub-surface flow constructed wetlands; (b) a multipurpose area with a surface flow constructed wetland or pond with multiple r…	Created habitats	Created wetland	Other terrestrial	Italy	High income	Europe	No conflict declared	Unclear		X				Poor detail				Implied comparison to both grey infrastructure and absence of an intervetnion altogether.		X		Tax pre	Ecosystem composition	Presence of specified taxa, including threatened species	Animals	Animals	Animals, plants & other	Amphibia, aves, insecta, other macroinvertebrates		Macroinvertebrates, birds, amphibians		Unclear	Unclear/partially unclear	Aboveground & aquatic	Positive	Presence of "numerous macroinvertebrate taxa" in the pond, "among which which some Odonata (dragonflies and damselflies) that could be part of the Red List of threatened Species". The pond was also important for amphibians and bird populations, including one priority species for the EU Birds Directive. Positive effect because these outcomes were not present in the control site (grey infrastructur…	Visual surveys
Integrated valuation of a nature-based solution for water pollution control. Highlighting hidden benefits	INT-183-1	63c	The Gorla Maggiore water park, called here the green infrastructure. The water park is a constructed ecosystem of about 9 ha built on the Olona River bank during 2011-2012. It includes (a) a pollutant removal area composed of a grid, a sedimentation tank and four vertical sub-surface flow constructed wetlands; (b) a multipurpose area with a surface flow constructed wetland or pond with multiple r…	Created habitats	Created wetland	Other terrestrial	Italy	High income	Europe	No conflict declared	Unclear		X				Poor detail				Implied comparison to both grey infrastructure and absence of an intervetnion altogether.		X		Veg dens	Biomass	Percentage cover	Plants	Plants	Animals, plants & other		Other plants	Aquatic macrophytes including floating-leaved species		Unclear	Unclear/partially unclear	Aquatic	Positive	The littoral zone of the pond had dense beds of "emergent macrophytes" covering ~10% of the surface. Attached to these, floating-leaved species covered ~15%.	Visual surveys
Integrated valuation of a nature-based solution for water pollution control. Highlighting hidden benefits	INT-183-1	63d	The Gorla Maggiore water park, called here the green infrastructure. The water park is a constructed ecosystem of about 9 ha built on the Olona River bank during 2011-2012. It includes (a) a pollutant removal area composed of a grid, a sedimentation tank and four vertical sub-surface flow constructed wetlands; (b) a multipurpose area with a surface flow constructed wetland or pond with multiple r…	Created habitats	Created wetland	Other terrestrial	Italy	High income	Europe	No conflict declared	Unclear		X				Detailed				Comparison with grey infrasturcute and green infrastructure		X		Per	Unspecified	Expert judgement of biodiversity	Animals & plants	Plants, animals, & other	Animals, plants & other		Trees & other plants			Unclear	Unclear/partially unclear	Aboveground & aquatic	Positive	Biodiversity judged as "high" compared to "medium" for grey infrastructure and "very low" for poplar plantations	Visual surveys
Integrated valuation of a nature-based solution for water pollution control. Highlighting hidden benefits	INT-183-2	63.1a	Poplar plantation: private use of 4.2ha for productive forestry	Created habitats	Created forest	Forest	Italy	High income	Europe	No conflict declared	Unclear		X				Detailed				Comparison with grey infrasturcute and green infrastructure		X		Hab di	Diversity	Landscape diveristy - Shannon's diversity index, at landscape scale	Plants & NA	Plants, animals, & other	Animals, plants & other		Trees & other plants	Poplar trees		Unclear	Unclear/partially unclear	Aboveground	Positive	Landscape diversity (Shannon's diversity index) was higher in the poplar plantation (index = 1.89) than to the grey infrastructure (the control) (1.85), but lower than the green infrastructure (2).	Remote sensing
Integrated valuation of a nature-based solution for water pollution control. Highlighting hidden benefits	INT-183-2	63.1b	Poplar plantation: private use of 4.2ha for productive forestry	Created habitats	Created forest	Forest	Italy	High income	Europe	No conflict declared	Unclear		X				Detailed				Comparison with grey infrasturcute and green infrastructure		X		Per	Unspecified	Expert judgement of biodiversity	Animals & plants	Plants, animals, & other	Animals, plants & other		Trees & other plants			Unclear	Unclear/partially unclear	Aboveground & aquatic	Negative	Biodiversity judged as "very low" compared to "medium" for grey infrastructure and "high" for green infrastructure	Visual surveys
Adapting to climate change in the Godavari River basin of India by restoring traditional water storage systems	INT-186-1	64a	Restoring traditional "water tanks" (i.e. wetlands embedded in a semi-arid region); The project restored 12 water tanks covering an area of 11 ha, by removing 73,000 tonnes of sediment from the tanks (de-siliting increases te capacity of the tank to hold water).	Created habitats	Created wetland	Other terrestrial	India	Lower middle income	Asia + Pacific	No conflict declared	Yes	Author(s) associated with intervention & funding		X			Absent				Stated change over time				H qual	Habitat quality	Bird habitat quality	Plants	Plants	Just plants		Unclear	Bird habitat		Unclear	Unclear/partially unclear	Aboveground	Positive	"Habitat for birds improved, and other ecological benefits were observed"	Unclear
Responses to climate change and farming policies by rural communities in northern China: A report on field observation and farmers' perception in dryland north Shaanxi and Ningxia	INT-214-1	65a	In Yanchi, China, the dominant form of land use change under the Grain for Green Programme (GGP) was that grazing animals were kept in pens on the farm and not on rangelands. This intervention was part of broader the GGP policy that involved other actions such as changes to farming practices.	Restoration	Montane/Alpine	Other terrestrial	China	Upper middle income	Asia + Pacific	No conflict declared	No			X			Detailed				Stated change over time				Veg ext	Biomass	Vegetation cover	Plants	Plants	Plants & other		Unclear	Vegetation		Unclear	Unclear/partially unclear	Aboveground	Positive	Local farmers perceived an increase in vegetation cover	Qualitative primary data
Responses to climate change and farming policies by rural communities in northern China: A report on field observation and farmers' perception in dryland north Shaanxi and Ningxia	INT-214-1	65b	In Yanchi, China, the dominant form of land use change under the Grain for Green Programme (GGP) was that grazing animals were kept in pens on the farm and not on rangelands. This intervention was part of broader the GGP policy that involved other actions such as changes to farming practices.	Restoration	Montane/Alpine	Other terrestrial	China	Upper middle income	Asia + Pacific	No conflict declared	No			X			Detailed				Stated change over time				Per	Unspecified	Biodiversity	NA	Microorganisms, fungi & other	Plants & other		Unclear	Unspecified biodiversity		Unclear	Unclear/partially unclear	NA	Positive	Local farmers perceived an increase in biodiversity	Qualitative primary data
Responses to climate change and farming policies by rural communities in northern China: A report on field observation and farmers' perception in dryland north Shaanxi and Ningxia	INT-214-2	65.1a	In Ansai, China, the emphasis of the Grain for Green Programme (GGP) was to support conversion of agricultural land to forest. Included local land owners receiving funding for purchasing and planting trees on their land.	Created habitats	Created forest	Forest	China	Upper middle income	Asia + Pacific	No conflict declared	No			X			Detailed				Stated change over time				Veg ext	Biomass	Vegetation cover	Plants	Plants	Plants & other		Unclear	Vegetation		Unclear	Unclear/partially unclear	Aboveground	Positive	Local farmers perceived an increase in vegetation cover	Qualitative primary data
Responses to climate change and farming policies by rural communities in northern China: A report on field observation and farmers' perception in dryland north Shaanxi and Ningxia	INT-214-2	65.1b	In Ansai, China, the emphasis of the Grain for Green Programme (GGP) was to support conversion of agricultural land to forest. Included local land owners receiving funding for purchasing and planting trees on their land.	Created habitats	Created forest	Forest	China	Upper middle income	Asia + Pacific	No conflict declared	No			X			Detailed				Stated change over time				Per	Unspecified	Biodiversity	NA	Microorganisms, fungi & other	Plants & other		Unclear	Unspecified biodiversity		Unclear	Unclear/partially unclear	NA	Positive	Local farmers perceived an increase in biodiversity	Qualitative primary data
Climate change adaptation and disaster risk reduction (DRR) through coastal afforestation in South-Central Coast of Bangladesh	INT-241-1	66a	Coastal afforestation including mound plantation and strip plantations: innovative use of the unused coastal lands and to put up non-mangrove species in salinity-dominated coastal belts by involving coastal people….Akashmoni trees are planted on the mound plantation sites. This species has been evaluated and selected by the Bangladesh Forest Research Institute for different inundated coastal habi…	Created habitats	Created forest	Forest	Bangladesh	Lower middle income	Asia + Pacific	No conflict declared	Unclear			X			Absent				Stated change over time				Sp di	Diversity	Species diveristy, perceived	Plants & NA	Plants	Just plants		Trees & grasses & other plants	Forest plants, grasses, Acacia auriculiformis, and others		Unclear	Unclear/partially unclear	Aboveground	Positive	"Increased species diversity in the land" was reported in mound plantations of non-mnagrove species in salinity-dominated coastal belts. This may have been from the qualitative research e.g. interview and focus groups conducted, but not certain."	Unclear
[truncated: 45 more rows]

## Sheet: EH metric ID
Row ID
5.1a	Fifth paper coded, second intervention of paper 5, first biodiversity metric assessed for that intervention
	Note: rows in the SM spreadsheet that are for different CI outcomes of the same intervention (but the same case) were not used.
	E.g. 10.1a in this spreadsheet, is INT-065-2 in the SM spreadsheet

## Sheet: Metric definitions
Broad EH metric category	Ecosystem health metric	Short name used for coding	Definition
[truncated: 33 more rows]

[truncated: 1 more sheets: Taxa categories]
