# Supplementary material for: Can Nature-Based Solutions Deliver a Win-Win for Biodiversity and Climate Change Adaptation?
Source: Preprints.org preprint supplement (doi:10.20944/preprints202110.0336.v1), 2021-10-23
Supplement: Supplementary file 2 [file supplementary › Supplementary material preprint Key et al. 2021/Dataset 2 meta-analysis coding.xlsx]

## Sheet: Studies included
Paper	Intervention ID	EH metric ID	Description	Intervention type	Direction of effect	Outcome details	Kingdom	Plant info	Taxa description	Native composition	Include/exclude	Metric descr	Control for sample size	Spp ri treat	Spp ri control	Spp ri tr pre-int (for BACI or BA)	Spp ri co pre-int (for BACI)	Calc spp ri treat	Calc spp ri control	No. treat sites	No. control sites	Study type	Var/SD/SE treat	Var/SD/SE control	Var notes	Spatial scale	Temporal scale	Significance	Sig and direction at intervention level	Type of response ratio	Notes
Assisted natural regeneration with fencing central and northern zones of Burkina Faso	INT-041-1	1a	Assisted natural regeneration: fencing of degraded areas of rangeland to exclude animal browsing and allow trees to grow.	Combination	Positive	The average number of tree species per hectare in fenced areas increased to ~double that in non-fenced areas (11 vs. 5, 7 vs. 4, 9 vs. 4 spp/ha inside vs. outside fencing). General trend of increasing number of tree species as an area of degraded land was protected for longer.	Plants	Trees	Trees	Unclear	Include	Tree spp per hectare		9	4.3			(11+7+9)/3	(5+4+4)/3	3	3	CI			Insufficient data	0.41	9	Not tested	Not tested	Impact/control	If more data were given, then would be a BACI study. The spatial scale could be wrong since the authors made a mistake in the manuscript: 'The mean, the minimum and the maximum protected area per fenced site are 0.28 - 0.41 and 1 0.4 ha respectively'.
Tradeoffs in the Rehabilitation of a Succulent Karoo Rangeland	INT-044-1	2b	Transplantation of mature plants (a succulent species), planted at least 2m apart and watered for 2 weeks.	Restoration	No effect	Species richness did not differ significantly compared to the control.	Plants	Other plants	Transplanted species: Brownanthus pseudoschlichtianus (a long-lived succudlent dwarf shrub); also annual plants, pauciennials, others, short-lived shrubs and long-lived shrubs. The increase in cover consisted almost entirely of the transplanted species.	Native	Include	All vegetation species identified for each 10x10m plot		8	7.7					10	10	CI	0.69	0.92	SE	0.01	3	Not significant	Not sig	Impact/control	1) This is for transplant vs. control; note that half of the treatment (transplant) and control plots had livestock excluded. 2) Spp richness and SE taken from figure 3a 2010 data with webplotdigitiser, see data on sheet10.
Diversity, functional structure and functional redundancy of woodland plant communities: How do mixed tree species plantations compare with monocultures?	INT-066-1	11a	Thetford forest, UK: management of intimate mixtures of Scots pine and pedunculate oak.	Management	No effect	No signifcant difference in median species richness per 2x2m quadrat in the intervention stand (mixed) and the expected (controls: Scots pine (Pinus sylvestris) and pedunculate oak (Quercus robur) monocultures). (Thetford forest)	Plants	Trees & other plants	Vascular plant species	Mixed	Include	Median spp richness per 2x2m quadrat		4	6.1					5	5	CI	3.5	0	IQ range. Could calculate I think. SD given for means; but in the test, medians were used, for which IQ ranges were used. To find SD of control group would probably have to proportionally average across the SDs of the pine and oak monocultures.	4.64	76	Not significant	Not sig	Impact/control	Spp richness data from table A.5 in supplementary material. Intervention scale, age and no. sites data from table A.2. Mean planting year of stands = 1935. Mean stand size = 4.64 ha. Data were collected in 2011. The 'expected spp richness' is actually estimated from proportional vaeraging of the mean species richness in monocultures, across 5 oak monoculture and 5 pine monoculture sites.
Diversity, functional structure and functional redundancy of woodland plant communities: How do mixed tree species plantations compare with monocultures?	INT-066-2	11.1a	New Forest, UK: management of intimate mixtures of Scots pine and pedunculate oak.	Management	Positive	Significantly higher median species richness per 2x2m quadrat in the intervention stand (mixed species) than expected (extrapolating from performance in controls: Scots pine (Pinus sylvestris) and pedunculate oak (Quercus robur) monocultures). (New Forest)	Plants	Trees & other plants	Vascular plant species	Mixed	Include	Median spp richness per 2x2m quadrat		7	4.97					5	5	CI	3.5	0.02	IQ range. Could calculate I think. SD given for means; but in the test, medians were used, for which IQ ranges were used. To find SD of control group would probably have to proportionally average across the SDs of the pine and oak monocultures.	6.4	72	Significant	Pos sig	Impact/control	Spp richness data from table A.5 in supplementary material. Intervention scale, age and no. sites data from table A.2. Mean planting year of stands = 1939. Mean stand size = 6.4 ha. Data were collected in 2011. The 'expected spp richness' is actually estimated from proportional vaeraging of the mean species richness in monocultures, across 5 oak monoculture and 5 pine monoculture sites.
Diversity, functional structure and functional redundancy of woodland plant communities: How do mixed tree species plantations compare with monocultures?	INT-066-3	11.2a	Republic of Ireland: management of intimate mixtures of Scots pine and pedunculate oak.	Management	Negative	Significantly lower median observed species richness per 2x2m quadrat in the intervention (mixed stand) than that expected from performance in controls (Scots pine (Pinus sylvestris) and pedunculate oak (Quercus robur) monocultures). (Ireland)	Plants	Trees & other plants	Vascular plant species	Mixed	Include	Median spp richness per 2x2m quadrat		5	6.97					4	4	CI	2.25	0.12	IQ range. Could calculate I think. SD given for means; but in the test, medians were used, for which IQ ranges were used. To find SD of control group would probably have to proportionally average across the SDs of the pine and oak monocultures.	9.35	71	Significant	Neg sig	Impact/control	Spp richness data from table A.5 in supplementary material. Intervention scale, age and no. sites data from table A.2. Mean planting year of stands = 1940. Mean stand size = 9.35 ha. Data were collected in 2011. The 'expected spp richness' is actually estimated from proportional vaeraging of the mean species richness in monocultures, across 4 oak monoculture and 4 pine monoculture sites.
Grazing exclosure and plantation: A synchronic study of two restoration techniques improving plant community and soil properties in arid degraded steppes (Algeria)	INT-068-1.1m	13am	Livestock exclosures. Arid grassland restoration through a) livestock exclosures and b) planting of shrubs, with livestock excluded for the first 4 years. Planting was done in the most degraded areas. a) Livestock exclosures: used boundary stones, with agreement of nomad shephards to kee livestock out (rather than physical fencing). b) Planting: 220ha plantation; primarily Altriplex canescens, an…	Combination	Positive	Exclosures: grazing exclosures had higher richness than controls (23.28 species in exclosures, 11 in exclosure controls) and higher than in planted areas (15.94 species in planted areas). Surveys took place four years after restoration.	Plants	Grasses & other plants	Arid grassland species.	Mixed	Include	Mean spp richness in 64m2 plots	Used species-area curve to identiy minimum area for sampling	23.28	11					24	6	CI	0.9	0.97	SE	3400	4	Significant	Pos sig	Impact/control
Grazing exclosure and plantation: A synchronic study of two restoration techniques improving plant community and soil properties in arid degraded steppes (Algeria)	INT-068-1.2m	13.1am	Planting. Arid grassland restoration through a) livestock exclosures and b) planting of shrubs, with livestock excluded for the first 4 years. Planting was done in the most degraded areas. a) Livestock exclosures: used boundary stones, with agreement of nomad shephards to kee livestock out (rather than physical fencing). b) Planting: 220ha plantation; primarily Altriplex canescens, an evergreen s…	Combination	Positive	Planting: species richness was around twice as high in planted areas than their controls (15.94 vs. 8.63). Surveys took place four years after restoration.	Plants	Grasses & other plants	Arid grassland species. Planting was primarily of of Atriplex canscens (an evergreen shrub, native to North America), chosen for its drought and cold winter resistance to Algerian steppe.	Mixed	Include	Mean spp richness in 64m2 plots	Used species-area curve to identiy minimum area for sampling	15.94	8.63					17	8	CI	0.93	0.35	SE	220	4	Significant	Pos sig	Impact/control
Assessing the Ecological Success of Restoration by Afforestation on the Chinese Loess Plateau	INT-076-1	16c1m	North facing herb revegetation. Natural revegetation without intensive human interference (such as farming and grazing). 18 plots had been naturally restored for over 20 years.	Restoration	Positive	Species richness of natural recovery sites was significantly higher than pre-afforested sites (crop slopes), for N facing but not S facing herb sites, and both N and S facing shrub sites. However, the north facing herb sites had the highest species richness of all sites (19.33+/-4.8 (mean+/-SD)), and the north facing shrub site had a higher richness than the N facing C. korchinskii site, but slig…	Plants	Trees & other plants	Not specified, but 'natural revegetation'.	Unclear	Include	Mean spp richness in 10m2 plots		19.33	5.33					7	3	CI	4.8	1.15	SD	Not given	20	Significant	Pos sig/not sig	Impact/control	The plots have been restored 'for over 20 years'; no more info given so I put temporal scale as 20. The size of the interventions were not given, only the size of sample areas (note, I assumed herbaceous plots corresponded to grassland).
Assessing the Ecological Success of Restoration by Afforestation on the Chinese Loess Plateau	INT-076-1	16c2m	North facing shrub revegetation. Natural revegetation without intensive human interference (such as farming and grazing). 18 plots had been naturally restored for over 20 years.	Restoration	Positive	Species richness of natural recovery sites was significantly higher than pre-afforested sites (crop slopes), for N facing but not S facing herb sites, and both N and S facing shrub sites. However, the north facing herb sites had the highest species richness of all sites (19.33+/-4.8 (mean+/-SD)), and the north facing shrub site had a higher richness than the N facing C. korchinskii site, but slig…	Plants	Trees & other plants	Not specified, but 'natural revegetation'.	Unclear	Include	Mean spp richness for 25m2 plots		18.2	5.33					2	3	CI	8.53	1.15	SD	Not given	20	Significant	Pos sig/not sig	Impact/control	The plots have been restored 'for over 20 years'; no more info given so I put temporal scale as 20. The size of the interventions were not given, only the size of sample areas (note, I assumed herbaceous plots corresponded to grassland).
Assessing the Ecological Success of Restoration by Afforestation on the Chinese Loess Plateau	INT-076-1	16c3m	South facing herb revegetation. Natural revegetation without intensive human interference (such as farming and grazing). 18 plots had been naturally restored for over 20 years.	Restoration	No effect	Species richness of natural recovery sites was significantly higher than pre-afforested sites (crop slopes), for N facing but not S facing herb sites, and both N and S facing shrub sites. However, the north facing herb sites had the highest species richness of all sites (19.33+/-4.8 (mean+/-SD)), and the north facing shrub site had a higher richness than the N facing C. korchinskii site, but slig…	Plants	Trees & other plants	Not specified, but 'natural revegetation'.	Unclear	Include	Mean spp richness in 10m2 plots		10.5	5.33					7	3	CI	2.12	1.15	SD	Not given	20	Not significant	Pos sig/not sig	Impact/control	The plots have been restored 'for over 20 years'; no more info given so I put temporal scale as 20. The size of the interventions were not given, only the size of sample areas (note, I assumed herbaceous plots corresponded to grassland).
Assessing the Ecological Success of Restoration by Afforestation on the Chinese Loess Plateau	INT-076-1	16c4m	South facing shrub vegetation. Natural revegetation without intensive human interference (such as farming and grazing). 18 plots had been naturally restored for over 20 years.	Restoration	Positive	Species richness of natural recovery sites was significantly higher than pre-afforested sites (crop slopes), for N facing but not S facing herb sites, and both N and S facing shrub sites. However, the north facing herb sites had the highest species richness of all sites (19.33+/-4.8 (mean+/-SD)), and the north facing shrub site had a higher richness than the N facing C. korchinskii site, but slig…	Plants	Trees & other plants	Not specified, but 'natural revegetation'.	Unclear	Include	Mean spp richness for 25m2 plots		16.5	5.33					2	3	CI	9.19	1.15	SD	Not given	20	Significant	Pos sig/not sig	Impact/control	The plots have been restored 'for over 20 years'; no more info given so I put temporal scale as 20. The size of the interventions were not given, only the size of sample areas (note, I assumed herbaceous plots corresponded to grassland).
Assessing the Ecological Success of Restoration by Afforestation on the Chinese Loess Plateau	INT-076-2	16.1e1m	N facing shrub planting (Caragana korshinskii); in the Zhifanggou watershed, which is the state-level model watershed of the "Grain for Green" project.	Created habitats	Positive	Species richness in C. korshinskii plantations was 16.5+/-4.77 on N facing slopes, and 12.5+/-0.71 on S facing slopes, compared to just 5.33+/1.15 for pre-afforested sites (slope croplands) - this difference was significant for N facing slopes. Species richness did not differ significantly between C. korshinskii plantations and natural recovery sites; N facing sites had similar richnesses (19.33+…	Plants	Other plants	Shrubs, primarily C korshinkii, and herbaceous species.	Mixed	Include	Mean spp richness for 25m2 plots		16.5	5.33					3	3	CI	4.77	1.15	SD	Not given	20	Significant	Pos sig/not sig	Impact/control	The plots have been restored 'for over 20 years'; no more info given so I put temporal scale as 20.
Assessing the Ecological Success of Restoration by Afforestation on the Chinese Loess Plateau	INT-076-2	16.1e2m	S facing shrub planting (Caragana korshinskii); in the Zhifanggou watershed, which is the state-level model watershed of the "Grain for Green" project.	Created habitats	No effect	Species richness in C. korshinskii plantations was 16.5+/-4.77 on N facing slopes, and 12.5+/-0.71 on S facing slopes, compared to just 5.33+/1.15 for pre-afforested sites (slope croplands) - this difference was significant for N facing slopes. Species richness did not differ significantly between C. korshinskii plantations and natural recovery sites; N facing sites had similar richnesses (19.33+…	Plants	Other plants	Shrubs, primarily C korshinkii, and herbaceous species.	Mixed	Include	Mean spp richness for 25m2 plots		12.5	5.33					3	3	CI	0.71	1.15	SD	Not given	20	Not significant	Pos sig/not sig	Impact/control	The plots have been restored 'for over 20 years'; no more info given so I put temporal scale as 20.
Assessing the Ecological Success of Restoration by Afforestation on the Chinese Loess Plateau	INT-076-3	16.2g1m	N facing tree planting (Robinia pseudoacacia) in the Zhifanggou watershed; the state-level model watershed of the "Grain for Green" project.	Created habitats	Positive	Species richness in R. pseudoacacia plantations was 19.0+/-5.94 on N facing slopes, and 13.5+/-3.42 on S facing slopes, compared to just 5.33+/1.15 for pre-afforested sites (slope croplands) - this difference was significant for N facing slopes. Species richness did not differ significantly between R. pseudoacacia plantations and natural recovery sites; N facing sites had similar richnesses (19.3…	Plants	Trees & other plants	Trees, primarily R pseudoacacia, and herb and shrub spp.	Mixed	Include	Mean spp richness for 100m2 plots		19	5.33					4	3	CI	5.94	1.15	SD	Not given	20	Significant	Pos sig/not sig	Impact/control	The plots have been restored 'for over 20 years'; no more info given so I put temporal scale as 20.
Assessing the Ecological Success of Restoration by Afforestation on the Chinese Loess Plateau	INT-076-3	16.2g2m	S facing tree planting (Robinia pseudoacacia) in the Zhifanggou watershed; the state-level model watershed of the "Grain for Green" project.	Created habitats	No effect	Species richness in R. pseudoacacia plantations was 19.0+/-5.94 on N facing slopes, and 13.5+/-3.42 on S facing slopes, compared to just 5.33+/1.15 for pre-afforested sites (slope croplands) - this difference was significant for N facing slopes. Species richness did not differ significantly between R. pseudoacacia plantations and natural recovery sites; N facing sites had similar richnesses (19.3…	Plants	Trees & other plants	Trees, primarily R pseudoacacia, and herb and shrub spp.	Mixed	Include	Mean spp richness for 100m2 plots		13.5	5.33					4	3	CI	3.42	1.15	SD	Not given	20	Not significant	Pos sig/not sig	Impact/control	The plots have been restored 'for over 20 years'; no more info given so I put temporal scale as 20.
Community involvement in management for maintaining coral reef resilience and biodiversity in southern Caribbean marine protected areas	INT-130-1	24b	National Natural Park Rosario and San Bernardo Corals is an extensive marine protected area (MPA), established in 1977, and covering the most diverse and developed coral reefs in the Colombian continental platform. This study looked at 16 reef sites within the MPA (and compared with eight outside the MPA); the MPA also includes mangroves and seagrass.	Protection	No effect	Average species richness was 13.62 (range: 7-20) inside the MPA compared to 12.62 (9-17) outside. Bootstrapping showed no differences between original and resampled values. So there were marginally but insignificantly more species inside the MPA.	Animals	NA	Three economically important families of fish: Lutjanidae, Scaridae, and Serranidae	Unclear	Include	Spp richness in 100m2 (50x2m) transects.		13.62	12.62					16	8	CI	7 to 20	9 to 17	Range	Not given	29	Not significant	Not sig	Impact/control
Coastal protection and conservation on sandy beaches and dunes: context-dependent tradeoffs in ecosystem service supply	INT-027-1	25a1m	Backdune, native spp. Seven habitat restoration areas on Oregon and southern Washington beaches. Restoration involved foredune and beachgrass removal, predator management, and recreational beach restrictions. 'Beachgrass removal was conducted one to three years prior to conducting the surveys, using bulldozing, discing, herbicide, hand pulling, or burning.' The beachgrass had been intentionally i…	Created habitats	Negative	Beachgrass removal (habitat restoration) was associated with an 84% decrease in native backdune plant richness, a 29% decrease in exotic backdune plant richness, and no change in either endemic beach and foredune plant richness or exotic beach and foredune plant richness.	Plants	Grasses & other plants	Endemic dune plant richness.	Native	Include	Spp richness in 0.25m2 quadrats along transects (more than one per site, 58 in total)	Richness estimates rarefied with bootstrap method	16	100			100-84		7	7	CI			95% posterior interval for change: 75–91% decrease	Not given	2	Significant	Neg sig	Impact/control	1) Whilst the intervention led to reduced plant spp richness, it's crucial to put this into the context of saving the plover. 2) Change in spp richness reported as an 84 decrease in native backdune plant richness - this is equivalent to a response ratio of 16:100 3) Temporal scale was reported as 1-3 years so I took the mid point of 2. 4) Emailed author - he sent data that I might be able to incl…
Coastal protection and conservation on sandy beaches and dunes: context-dependent tradeoffs in ecosystem service supply	INT-027-1	25a2m	Backdune, exotic spp. Seven habitat restoration areas on Oregon and southern Washington beaches. Restoration involved foredune and beachgrass removal, predator management, and recreational beach restrictions. 'Beachgrass removal was conducted one to three years prior to conducting the surveys, using bulldozing, discing, herbicide, hand pulling, or burning.' The beachgrass had been intentionally i…	Created habitats	Negative	Beachgrass removal (habitat restoration) was associated with an 84% decrease in native backdune plant richness, a 29% decrease in exotic backdune plant richness, and no change in either endemic beach and foredune plant richness or exotic beach and foredune plant richness.	Plants	Grasses & other plants	Exotic dune plant richness.	Non-native	Include	Spp richness in 0.25m2 quadrats along transects (more than one per site, 58 in total)	Richness estimates rarefied with bootstrap method	51	100			100-49		7	7	CI			95% posterior interval for change: 27-70% decrease	Not given	2	Significant	Neg sig	Impact/control	1) Whilst the intervention led to reduced plant spp richness, it's crucial to put this into the context of saving the plover. 2) Change in spp richness reported as a 49% decrease in native backdune plant richness - this is equivalent to a response ratio of 51:100 3) Temporal scale was reported as 1-3 years so I took the mid point of 2. 4) Emailed author - he sent data that I might be able to incl…
Restoring aboveground carbon and biodiversity: a case study from the Nile basin, Ethiopia	INT-033-1	26a	Ecological restoration; restoration of degraded watersheds through exclosures Exclosures are areas closed off or protected from interference from people and domestic animals, with the goal of promoting natural regeneration of plants and reducing land degradation of formerly degraded communal grazing lands (Mekuria et al. 2011). In exclosures, grass harvesting (using a cut and carry system) is the…	Combination	Positive	9-32 plant species found within exclosures, compared to four plant species in control areas (communal grazing land). 'The increases in species richness with exclosure age is not linear, as 4-year-old exclosure displayed lower species richness when compared to the 3-year-old exclosure and the first two youngest exclosures displayed equal amounts of species richness.'	Plants	Trees & grasses & other plants	Climbers, shrubs, trees and other plants	Unclear	Include	Mean spp richness across 400m2 (20x20m) plots.		16.83	4			(9+9+18+14+19+32)/6		6	1	CI	7.82	0	SD	6.8	3.7	Not tested	Not tested	Impact/control	Spatial scale (exclosure area) is the mean: (2.4+3.2+3.6+4.7+12.7+14)/6. Temporal scale (exclosure age) is the mean: (1+2+3+4+5+7)/6. SD calculated by: SQRT(((9-16.83)^2+(9-16.83)^2+(18-16.83)^2+(14-16.83)^2+(19-16.83)^2+(32-16.83)^2)/6) = 7.81913678100083.
Low-cost grass restoration using erosion barriers in a degraded African rangeland	INT-087-1.1m	31.1mc	Trenches with small berms. Restoration of degraded rangeland using five different types of erosion barriers, either: (1) trenches with small berms; (2) bundles of branches; and bundles of branches with (3) elephant dung balls, (4) burlap sacking, or (5) nylon mesh sacking inside them. The authors also tested whether barrier performance depended on (1) supplemental seeding with the grass Cenchrus …	Restoration	Positive	Authors infer that species richness was increased by all barrier types compared to having no barrier. Species richness was highest for trench barriers, followed by nylon mesh. Trench barrier richness was stat significantly higher than all other barriers except for nylon mesh. Seeding with Cenchrus did not effect species richness.	Plants	Trees & grasses & other plants	Woody vegetation is dominated by Acacia species (Fabaceae) A. etbaica, A. brevispica,and A. mellifera, along with the shrubs Croton dichogamous (Euphorbiaceae), Grewia spp. (Malvaceae), and Rhus vulgaris (Anacardiaceae).' 'The landscape is a heterogeneous mosaic ofbare soil, trees, and grasses, dominated by Eragrostis tenuifolia (Wiry lovegrass), Aristida kenyensis (Poaceae), and Cynodon dactylon…	Mixed	Include	Mean species richness in 2m2 (1m x 2m) plots		19.3		0				16	16	BA	1.84	0	SE	6e-07	1	Not tested	Not tested	After/before	1) Species richness data taken from figure 2b using webplot digitiser. Assumed pre-intervention species richness was zero since authors claim that there was 'no evidence of new grass establishment in bare areas, except in areas influenced by construction of the barriers' and 'Untreated, bare areas in all blocks remained bare and capped with a hard clay layer'; plus barriers were only onstructed i…
Low-cost grass restoration using erosion barriers in a degraded African rangeland	INT-087-1.2m	31.2mc	Bundles of branches. Restoration of degraded rangeland using five different types of erosion barriers, either: (1) trenches with small berms; (2) bundles of branches; and bundles of branches with (3) elephant dung balls, (4) burlap sacking, or (5) nylon mesh sacking inside them. The authors also tested whether barrier performance depended on (1) supplemental seeding with the grass Cenchrus ciliar…	Restoration	Positive	Authors infer that species richness was increased by all barrier types compared to having no barrier. Species richness was highest for trench barriers, followed by nylon mesh. Trench barrier richness was stat significantly higher than all other barriers except for nylon mesh. Seeding with Cenchrus did not effect species richness.	Plants	Trees & grasses & other plants	Woody vegetation is dominated by Acacia species (Fabaceae) A. etbaica, A. brevispica,and A. mellifera, along with the shrubs Croton dichogamous (Euphorbiaceae), Grewia spp. (Malvaceae), and Rhus vulgaris (Anacardiaceae).' 'The landscape is a heterogeneous mosaic ofbare soil, trees, and grasses, dominated by Eragrostis tenuifolia (Wiry lovegrass), Aristida kenyensis (Poaceae), and Cynodon dactylon…	Mixed	Include	Mean species richness in 2m2 (1m x 2m) plots		19.4		0				16	16	BA	1.48	0	SE	6e-07	1	Not tested	Not tested	After/before	1) Species richness data taken from figure 2b using webplot digitiser. Assumed pre-intervention species richness was zero since authors claim that there was 'no evidence of new grass establishment in bare areas, except in areas influenced by construction of the barriers' and 'Untreated, bare areas in all blocks remained bare and capped with a hard clay layer'; plus barriers were only onstructed i…
Low-cost grass restoration using erosion barriers in a degraded African rangeland	INT-087-1.3m	31.3mc	Elephant dung balls with bundles of branches. Restoration of degraded rangeland using five different types of erosion barriers, either: (1) trenches with small berms; (2) bundles of branches; and bundles of branches with (3) elephant dung balls, (4) burlap sacking, or (5) nylon mesh sacking inside them. The authors also tested whether barrier performance depended on (1) supplemental seeding with …	Restoration	Positive	Authors infer that species richness was increased by all barrier types compared to having no barrier. Species richness was highest for trench barriers, followed by nylon mesh. Trench barrier richness was stat significantly higher than all other barriers except for nylon mesh. Seeding with Cenchrus did not effect species richness.	Plants	Trees & grasses & other plants	Woody vegetation is dominated by Acacia species (Fabaceae) A. etbaica, A. brevispica,and A. mellifera, along with the shrubs Croton dichogamous (Euphorbiaceae), Grewia spp. (Malvaceae), and Rhus vulgaris (Anacardiaceae).' 'The landscape is a heterogeneous mosaic ofbare soil, trees, and grasses, dominated by Eragrostis tenuifolia (Wiry lovegrass), Aristida kenyensis (Poaceae), and Cynodon dactylon…	Mixed	Include	Mean species richness in 2m2 (1m x 2m) plots		20.1		0				16	16	BA	1.34	0	SE	6e-07	1	Not tested	Not tested	After/before	1) Species richness data taken from figure 2b using webplot digitiser. Assumed pre-intervention species richness was zero since authors claim that there was 'no evidence of new grass establishment in bare areas, except in areas influenced by construction of the barriers' and 'Untreated, bare areas in all blocks remained bare and capped with a hard clay layer'; plus barriers were only onstructed i…
Low-cost grass restoration using erosion barriers in a degraded African rangeland	INT-087-1.4m	31.4mc	Burlap sacking with bundles of branches. Restoration of degraded rangeland using five different types of erosion barriers, either: (1) trenches with small berms; (2) bundles of branches; and bundles of branches with (3) elephant dung balls, (4) burlap sacking, or (5) nylon mesh sacking inside them. The authors also tested whether barrier performance depended on (1) supplemental seeding with the g…	Restoration	Positive	Authors infer that species richness was increased by all barrier types compared to having no barrier. Species richness was highest for trench barriers, followed by nylon mesh. Trench barrier richness was stat significantly higher than all other barriers except for nylon mesh. Seeding with Cenchrus did not effect species richness.	Plants	Trees & grasses & other plants	Woody vegetation is dominated by Acacia species (Fabaceae) A. etbaica, A. brevispica,and A. mellifera, along with the shrubs Croton dichogamous (Euphorbiaceae), Grewia spp. (Malvaceae), and Rhus vulgaris (Anacardiaceae).' 'The landscape is a heterogeneous mosaic ofbare soil, trees, and grasses, dominated by Eragrostis tenuifolia (Wiry lovegrass), Aristida kenyensis (Poaceae), and Cynodon dactylon…	Mixed	Include	Mean species richness in 2m2 (1m x 2m) plots		23.8		0				16	16	BA	0.67	0	SE	6e-07	1	Not tested	Not tested	After/before	1) Species richness data taken from figure 2b using webplot digitiser. Assumed pre-intervention species richness was zero since authors claim that there was 'no evidence of new grass establishment in bare areas, except in areas influenced by construction of the barriers' and 'Untreated, bare areas in all blocks remained bare and capped with a hard clay layer'; plus barriers were only onstructed i…
Low-cost grass restoration using erosion barriers in a degraded African rangeland	INT-087-1.5m	31.5mc	Nylon mesh sacking with bundles of branches. Restoration of degraded rangeland using five different types of erosion barriers, either: (1) trenches with small berms; (2) bundles of branches; and bundles of branches with (3) elephant dung balls, (4) burlap sacking, or (5) nylon mesh sacking inside them. The authors also tested whether barrier performance depended on (1) supplemental seeding with t…	Restoration	Positive	Authors infer that species richness was increased by all barrier types compared to having no barrier. Species richness was highest for trench barriers, followed by nylon mesh. Trench barrier richness was stat significantly higher than all other barriers except for nylon mesh. Seeding with Cenchrus did not effect species richness.	Plants	Trees & grasses & other plants	Woody vegetation is dominated by Acacia species (Fabaceae) A. etbaica, A. brevispica,and A. mellifera, along with the shrubs Croton dichogamous (Euphorbiaceae), Grewia spp. (Malvaceae), and Rhus vulgaris (Anacardiaceae).' 'The landscape is a heterogeneous mosaic ofbare soil, trees, and grasses, dominated by Eragrostis tenuifolia (Wiry lovegrass), Aristida kenyensis (Poaceae), and Cynodon dactylon…	Mixed	Include	Mean species richness in 2m2 (1m x 2m) plots		25		0				16	16	BA	0.96	0	SE	6e-07	1	Not tested	Not tested	After/before	1) Species richness data taken from figure 2b using webplot digitiser. Assumed pre-intervention species richness was zero since authors claim that there was 'no evidence of new grass establishment in bare areas, except in areas influenced by construction of the barriers' and 'Untreated, bare areas in all blocks remained bare and capped with a hard clay layer'; plus barriers were only onstructed i…
Development and testing of a sustainable environmental restoration policy on eradicating the poverty trap in China’s Changting County	INT-219-1	34a	Soil and water conservation project: a new development policy was tested starting in 2000, desgined to promote both environmnetal conservation and poverty reduction. 'The policy provided annual compensation of RMB 10 million (US$1 equaled approximately RMB 8.27 in 2000) from the province’s budget in areas that were experiencing the heaviest soil erosion.' 'Farmers received living subsidies that c…	Mixed created/non-created habitats	Positive	Species richness (no. vegetation species per ha) increased stat significantly from 1999 to 2007 (policy started in 2000), whilst species richness increased insignificanly outside the project area over the same time period. The increase in species richness was significantly greater inside than outside the project area.	Plants	Grasses & other plants	Forest and other vegetation	Unclear	Include	Spp richness per hectare i.e. 10,000m2 (they actually counted all species found in 12m2 (two 4m2 circles), or along two 10m transects, depending on the habitat type within each hectare plot). Assume cumulative acrros the sampling sites within the ha plots.		38	83	6	72			110	27.5	BACI			Insufficient data	Not given	7	Significant, but see notes column	Pos sig	After/before	This significance is for the the BA in the treatment site, and for between the %change for the control and treatment sites. No. treatment sites = 20 villages*5.5 plots, where 5.5 is the mid-point of 3 and 8 plots. No. control sites = 5 villages*5.5 plots.
Short-term effects of spring prescribed burning on the understory vegetation of a Pinus halepensis forest in Northeastern Spain	INT-103-1	37a	Springtime prescribed burning of understory (under a Pinus halepensis canopy).	Management	No effect	Mean total species richness was lower 1 year after prescribed burning, but this change was not stat significant. The total no. of species across all plots decreased from 34 species prior to 25 after burning. This held when disaggregating by functional type (mean herbacous richness amd mean woody richness also decreased not sig) and by post-fire strategy (mean seeder richness and mean resprouter r…	Plants	Trees & other plants	The pine forests' understory is composed of Querco-Lentiscetum ... macchia, dominated by P. lentiscus and Q. coccifera,and Rosmarino-Ericion ... shrublands, dominated by R. officinalis and Erica multiflora L., with the presence of Ulex parviflorus Pourr.'	Unclear	Include	Mean spp richness across three 100m2 (10x10m) plots (each divided into grid of 100 1m2 quadrats).		18		26.3				1	1	BA	1.7	4.9	SD	19.2	0.83	Not significant	Not sig	After/before	The temporal scale here is 0.83 years (10 months) since burning - this differs from other interventions in that it reflects length of time for the ecosystem to regenerate after fire, rather than the length of the intervention itself. Estimated the area burnt from the map as: 80m*3(80m)=19,200m2=19.2ha.
The impact of extreme flooding events and anthropogenic stressors on the macrobenthic communities' dynamics	INT-121-1	44a1m	Zostera noltii bed. Seagrass bed restoration: 'Due to the decline of seagrass beds and progressive impoverishment of the habitat, a management programme was implemented in 1998 in order to restore the original seagrass community. This programme included measures to decrease nutrient loading, physical protection of the seagrass bed and improvement of the hydraulic regime, by enlarging the connecti…	Restoration	Negative	Species richness of the segrass bed site, and the intermediate site (a site which spatially lies between the seagrass bed and eutrophic site), started to increase once the restoration programme started in 1998. It increased until the winter of 2000/20001, when there was an unprecendeted high rainfall event leading to the largest flood in Portual of the '20th century'; this in turn led to a fall i…	Animals	NA	Macrobenthic fauna including detritovores (including surface-deposit feeders, subsurface-deposit feedbers, and suspension feeders), carnivores, herbivores and omnivores). Macrobenthic fauna include mudsnails (Hydrobia ulvae), bivalves (e.g. Scrobicularia plana (peppery furrow shell) and Cerastoderma edule), and polychaetes (e.g. Hediste diversicolor).	Unclear	Include	Spp richness for the sampling site (cumulatively 6-10 13.5cm diameter cores)		18.4		22.2				8	8	BA	2.41	2.97	SD	300	2	Could calculate	Not tested	After/before	1) Spatial scale estimated from map as 3kmx1km=3,000,000m2=300ha. 2) Temporal scale is 1-3 years, so I took mid-point of 2. 3) No. treatment and control sites was reported as 6-10, so I took the mid-point, 8. 4) SD calculated rom data on sheet3
The impact of extreme flooding events and anthropogenic stressors on the macrobenthic communities' dynamics	INT-121-1	44a2m	Intermediate site. Seagrass bed restoration: 'Due to the decline of seagrass beds and progressive impoverishment of the habitat, a management programme was implemented in 1998 in order to restore the original seagrass community. This programme included measures to decrease nutrient loading, physical protection of the seagrass bed and improvement of the hydraulic regime, by enlarging the connectio…	Restoration	Positive	Species richness of the segrass bed site, and the intermediate site (a site which spatially lies between the seagrass bed and eutrophic site), started to increase once the restoration programme started in 1998. It increased until the winter of 2000/20001, when there was an unprecendeted high rainfall event leading to the largest flood in Portual of the '20th century'; this in turn led to a fall i…	Animals	NA	Macrobenthic fauna including detritovores (including surface-deposit feeders, subsurface-deposit feedbers, and suspension feeders), carnivores, herbivores and omnivores). Macrobenthic fauna include mudsnails (Hydrobia ulvae), bivalves (e.g. Scrobicularia plana (peppery furrow shell) and Cerastoderma edule), and polychaetes (e.g. Hediste diversicolor).	Unclear	Include	Spp richness for the sampling site (cumulatively 6-10 13.5cm diameter cores)		17.1		16.7				8	8	BA	2.01	1.87	SD	300	2	Could calculate	Not tested	After/before	1) Spatial scale estimated from map as 3kmx1km=3,000,000m2=300ha. 2) Temporal scale is 1-3 years, so I took mid-point of 2. 3) No. treatment and control sites was reported as 6-10, so I took the mid-point, 8. 4) SD calculated rom data on sheet4
The impact of extreme flooding events and anthropogenic stressors on the macrobenthic communities' dynamics	INT-121-1	44a3m	Eutrophic site. Seagrass bed restoration: 'Due to the decline of seagrass beds and progressive impoverishment of the habitat, a management programme was implemented in 1998 in order to restore the original seagrass community. This programme included measures to decrease nutrient loading, physical protection of the seagrass bed and improvement of the hydraulic regime, by enlarging the connection b…	Restoration	Positive	Species richness of the segrass bed site, and the intermediate site (a site which spatially lies between the seagrass bed and eutrophic site), started to increase once the restoration programme started in 1998. It increased until the winter of 2000/20001, when there was an unprecendeted high rainfall event leading to the largest flood in Portual of the '20th century'; this in turn led to a fall i…	Animals	NA	Macrobenthic fauna including detritovores (including surface-deposit feeders, subsurface-deposit feedbers, and suspension feeders), carnivores, herbivores and omnivores). Macrobenthic fauna include mudsnails (Hydrobia ulvae), bivalves (e.g. Scrobicularia plana (peppery furrow shell) and Cerastoderma edule), and polychaetes (e.g. Hediste diversicolor).	Unclear	Include	Spp richness for the sampling site (cumulatively 6-10 13.5cm diameter cores)		13		12.5				8	8	BA	1.79	2.1	SD	300	2	Could calculate	Not tested	After/before	1) Spatial scale estimated from map as 3kmx1km=3,000,000m2=300ha. 2) Temporal scale is 1-3 years, so I took mid-point of 2. 3) No. treatment and control sites was reported as 6-10, so I took the mid-point, 8. 4) SD calculated rom data on sheet5
The Importance of Phytogenic Mounds (Nebkhas) for Restoration of Arid Degraded Rangelands in Northern Sinai	INT-127-1	47a1m	Protection of white broom nebkhas (phytogenic mounds) from heavy goat and sheep grazing for 12 years; occurred within a broader protected area nature reserve.	Combination	Positive	Nebkhas: Grazing had a negative effect on species richness of herbaceous species in both internebka spaces, and in nebkha patches. Nebkha area explained 36% of variance in species richness at grazed nebkha sites, compared to 19% at ungrazed (protected) sites.	Plants	Grasses & other plants	Retama raetam (white broom), 3 palatale grasses, 2 short grasses, 2 forbs, short forbs (and other plants)	Unclear	Include	Mean spp richness per m2 (averaged across 8 quadrats at each of 30 nebkhas)		9.7	7.3					30	30	CI	1.58737	1.33152	SE	3.8	12	Significant	Pos sig	Impact/control	Spp richness and SE data extracted from Fig 4 with Webplotdigitiser; see Sheet4. Mean ungrazed nebkha size taken from figure 2.
The Importance of Phytogenic Mounds (Nebkhas) for Restoration of Arid Degraded Rangelands in Northern Sinai	INT-127-1	47a2m	Protection of inter-nebkha spaces from heavy goat and sheep grazing for 12 years; occurred within a broader protected area nature reserve.	Combination	Positive	Inter-nebkha space: Grazing had a negative effect on species richness of herbaceous species in both internebka spaces, and in nebkha patches. Nebkha area explained 36% of variance in species richness at grazed nebkha sites, compared to 19% at ungrazed (protected) sites.	Plants	Grasses & other plants	Retama raetam (white broom), 3 palatale grasses, 2 short grasses, 2 forbs, short forbs (and other plants)	Unclear	Include	Mean spp richness per m2 (averaged across 8 quadrats at each of 30 inter-nebkha spaces)		8.4	4.8					30	30	CI	1.13761	2.07742	SE	Not given	12	Significant	Pos sig	Impact/control	Spp richness and SE data extracted from Fig 4 with Webplotdigitiser; see Sheet4.
Development of Vegetation and Aquatic Habitat in Restored Riparian Sites of Californiaâ€™s North Coast Rangela	INT-139-1	51d1m	102 sites where riparian restoration has taken place in California. "Site selection focused on projects with documented implementation dates in alluvial stream reaches of willow and mixed oak woodland vegetation with few trees present prior to project installation ... Surveyed project sites were primarily on second- and third-order streams with a range in project age from 4 to 39 years since rest…	Restoration	Positive	Tree spp richness increased with age of restoration site. Positive polynomial relationship with time (R2=0.27)	Plants	Trees	Woody vegetation, native/exotic trees, shrubs and vines N.B. this applies to all of 51d	Mixed	Include	Species richness per plot, estimated using 1000cm2 (20x50cm) frames - not clear how many. Plot size varied, determied by the size of banks adjacent to rivers.		2.2		0.6		Estimated from polynomial, see notes and sheet5	Estimated from polynomial, see notes and sheet5	89	13	BA (time series)			Insufficient data	Not given	21.5	Significant relationship (rather than difference)	Pos sig/neg sig	After/before	1) Spp richness data was not reported in the study, so I used the equations that described spp richness as a function of age of restoration site to estimate the spp richness at time 0 and after 22 years (the rounded mid-point of the age range 4-39 years); I plotted the graphs described in Table 1 of the paper to find these estimates. 2) Temporal scale = mid-point of 4-39, which is 4+(39-4)/2=21.5…
Development of Vegetation and Aquatic Habitat in Restored Riparian Sites of Californiaâ€™s North Coast Rangela	INT-139-1	51d2m	102 sites where riparian restoration has taken plae in California. "Site selection focused on projects with documented implementation dates in alluvial stream reaches of willow and mixed oak woodland vegetation with few trees present prior to project installation ... Surveyed project sites were primarily on second- and third-order streams with a range in project age from 4 to 39 years since resto…	Restoration	Positive	Shrub/vine richness: positive polynomial (R2=0.24)	Plants	Other plants	Woody vegetation, native/exotic trees, shrubs and vines N.B. this applies to all of 51d	Mixed	Include	Species richness per plot, estimated using 1000cm2 (20x50cm) frames - not clear how many. Plot size varied, determied by the size of banks adjacent to rivers.		1.6		0.4		Estimated from polynomial, see notes and sheet5	Estimated from polynomial, see notes and sheet5	89	13	BA (time series)			Insufficient data	Not given	21.5	Significant relationship (rather than difference)	Pos sig/neg sig	After/before	1) Spp richness data was not reported in the study, so I used the equations that described spp richness as a function of age of restoration site to estimate the spp richness at time 0 and after 22 years (the rounded mid-point of the age range 4-39 years); I plotted the graphs described in Table 1 of the paper to find these estimates. 2) Temporal scale = mid-point of 4-39, which is 4+(39-4)/2=21.5…
Development of Vegetation and Aquatic Habitat in Restored Riparian Sites of Californiaâ€™s North Coast Rangela	INT-139-1	51d3m	102 sites where riparian restoration has taken plae in California. "Site selection focused on projects with documented implementation dates in alluvial stream reaches of willow and mixed oak woodland vegetation with few trees present prior to project installation ... Surveyed project sites were primarily on second- and third-order streams with a range in project age from 4 to 39 years since resto…	Restoration	Positive	Perernnial herbaceous richness: positive polynomial (R2=0.14)	Plants	Other plants	Woody vegetation, native/exotic trees, shrubs and vines N.B. this applies to all of 51d	Mixed	Include	Species richness per plot, estimated using 1000cm2 (20x50cm) frames - not clear how many. Plot size varied, determied by the size of banks adjacent to rivers.		2.2		1.9		Estimated from polynomial, see notes and sheet5	Estimated from polynomial, see notes and sheet5	89	13	BA (time series)			Insufficient data	Not given	21.5	Significant relationship (rather than difference)	Pos sig/neg sig	After/before	1) Spp richness data was not reported in the study, so I used the equations that described spp richness as a function of age of restoration site to estimate the spp richness at time 0 and after 22 years (the rounded mid-point of the age range 4-39 years); I plotted the graphs described in Table 1 of the paper to find these estimates. 2) Temporal scale = mid-point of 4-39, which is 4+(39-4)/2=21.5…
Development of Vegetation and Aquatic Habitat in Restored Riparian Sites of Californiaâ€™s North Coast Rangela	INT-139-1	51d4m	102 sites where riparian restoration has taken plae in California. "Site selection focused on projects with documented implementation dates in alluvial stream reaches of willow and mixed oak woodland vegetation with few trees present prior to project installation ... Surveyed project sites were primarily on second- and third-order streams with a range in project age from 4 to 39 years since resto…	Restoration	Negative	Annual herbaveous richness: negative linear (R2=0.21)	Plants	Other plants	Woody vegetation, native/exotic trees, shrubs and vines N.B. this applies to all of 51d	Mixed	Include	Species richness per plot, estimated using 1000cm2 (20x50cm) frames - not clear how many. Plot size varied, determied by the size of banks adjacent to rivers.		2.2		4.4		Estimated from linear equation, see notes and sheet5	Estimated from linear equation, see notes and sheet5	89	13	BA (time series)			Insufficient data	Not given	21.5	Significant relationship (rather than difference)	Pos sig/neg sig	After/before	1) Spp richness data was not reported in the study, so I used the equations that described spp richness as a function of age of restoration site to estimate the spp richness at time 0 and after 22 years (the rounded mid-point of the age range 4-39 years); I plotted the graphs described in Table 1 of the paper to find these estimates. 2) Temporal scale = mid-point of 4-39, which is 4+(39-4)/2=21.5…
Effect the exclosure on plant diversity of the Hammada scoparia steppe in the Naama steppe courses (Algeria)	INT-142-1	52b	8 exclosure sites using fencing to eliminate human and animal disturbances. The eight sites (out of 32 existing) most affected by desertification and silting were chosen for study.	Combination	Positive	108 plant species were found in exclosures, compared to just 44 in control areas without exclosures.	Plants	Other plants	Steppe plant species	Unclear	Include	Species richness estimated with transects; exact method unclear		108	44					Unclear	Unclear	CI			Insufficient data	Not given	4	Not tested	Not tested	Impact/control	Note that including despite not having information on no. control and treatment sites, to be as inclusive as possible. Including because have species richness data in treatment and control. But the paper is not high quality - it's unclear if there were 1 on 8 exclosures. The spatial scale is given as 19,000ha in the paper, but I think this might be the area within which 8 exclosures sit, rather t…
Effects of establishing an artificial grassland on vegetation characteristics and soil quality in a degraded meadow	INT-160-1	56a	Restoration and revegetation of degraded alpine grasslands with cultivars of native species. Seeds were gradually planted on heavily degraded grassland with a series of agronomic measures, such as ploughing and harrowing, with diammonium phosphate serving as the basal fertilizer. The seeded grasslands were fertilized with urea at the jointing stage in the second year. Livestock was excluded from …	Restoration	Positive	Species richness was significantly higher in the control (undisturbed native alpine meadow - i.e. restoration target), than the restored grassland areas, 4, 8, 9 and 14 years after seeding. The restored areas increased in species richness overtime, with year 9 being sig higher than year 4 and 7, and year 14 being sig higher than year 9. The restored area after 9 and 14 years also had a sig higher…	Plants	Grasses & other plants	Kobresia, E. nutans, F. sinensis, Eragrostis cilianensis, and P. crymophila; and other plants	Unclear	Include	Mean spp richness across three 250m2 plot (estimated by the total no. species found within two 0.5x5m transects)		19.67	5.8					3	3	CI	1.23	0.77	SD	0.25	14	Significant	Pos sig	Impact/control
Rehabilitation of a debris-flow prone mountain stream in southwestern China â€“ Strategies, effects and implications	INT-180-1	62a	Rehabilitation of a creek in China, which is debris prone. The issue is primarily anthropogenic in nature but it is driven also by climatic factors (i.e. the landslides/erosion risk is both anthropogenic and climatic). As a whole the intervention integrated a variety of engineering, biological, and social intervention. In areas subjected to serious gully erosion, small and medium-sized check dams…	Created habitats	Positive	Species richness of benthic macroinvertebrates was 28 for the restored creek in both 2005 and 2007, compared to 8 and 1 in the first control creek, and zero and zero in the second control creek. Restoration was initiated in the late 1970s, so these measurements were taken after a few decades for macrobenthic community to develop - however, we don't have a historical baseline condition to compare …	Animals	NA	Benthic macroinvertebrates; amphipoda, diptera, trichoptera, odonata, ephemaroptera, plecoptera, coleoptera, acariformers, gastropoda, ologochaeta, hirudinea, tricladida	Unclear	Include	Spp richness of middle reaches of the creeks, with over 3 samples of over 0.4m2 taken for different substrates, shallow/deep waters, and high/low velocities		28	0.5				Mid-point of richness at the two control sites (0 and 1)	1	2	CI			Insufficient data	Not given	29	Not tested	Not tested	Impact/control	1) Spatial scale was unclear, but part of the 9.1km long creek. 2) Rehabilitation was initiated in the 'late 1970s' so I took 1978 as the start date; spp diversity measures were from 2007. 3) Can't test significance because only 3 data points. 4) since the intervention is 'created', this means the vegetation may not be natural, but this doesn't strongly imply that the macroinvertebrates in the st…
Reducing risks by transforming landscapes: Cross-scale effects of land-use changes on ecosystem services	INT-252-1	70a	Conversion of forest to rubber plantations. In West Kalimantan, people converted forests to rubber plantations to diversify livelihoods and maintain their income in case of floods and droughts (Table 3, L1). The area of rubber plantations, and the number of people working them, have increased by around 40% in the last 20 years.	Created habitats	Negative	The rubber plantations had a mean of under 3 tree species, compared to a mean of about 12 tree species in "logged-over forest"	Plants	Trees	Logged-over forest mostly had mostly Shorea spp., Syzygium spp., and Turpinia spp.; rubber (Havea braziliensis), and fruit trees e.g. mango and durian/	Mixed	Include	Mean spp richness across 400m2 plots		2.14	12					7	16	CI	1.46	3.69	SD	Not given	Not given	Significant	Neg sig	Impact/control	a) The figure legends of fig 3 and 4 are reversed in the paper. I extracted data from figure 4 on biodiversity, and cross-checked with data from Table S2, which also contains SD data. b) Spatial and temporal scales will vary greatly, and were not given, since plots are scattered widely and not implemented by the same actors. c) Spp richness assumed to be sig different between treatment and contro…
Reducing risks by transforming landscapes: Cross-scale effects of land-use changes on ecosystem services	INT-252-2	70.1a	Ban of shifting cultivation in less degraded forest, and control of forest product use. The introduction of a new village rule to preserve forests in 2011 (Table 2, L2), which banned shifting cultivation in less degraded forests, mostly on hills (around 45% of the village territory). In these forests, people could harvest non-timber forest products (NTFPs) such as firewood, rattan, agarwood, and …	Combination	No effect	Protected forests had higher tree species richness than logged-over forest (mean of about 12.5 tree species compared to a mean of about 9.5 tree species.	Plants	Trees	Mostly Shorea spp., Syzygium spp., and Turpinia spp.	Unclear	Include	Mean spp richness across 400m2 plots		12.62	9.4					13	10	CI	2.99	1.19	SD	Not given	Not given	Not significant	Not sig	Impact/control	a) The figure legends of fig 3 and 4 are reversed in the paper. I extracted data from figure 4 on biodiversity, and cross-checked with data from Table S2, which also contains SD data. b) Spatial and temporal scales will vary greatly, and were not given, since plots are scattered widely and not implemented by the same actors. c) Spp richness assumed to be sig different between treatment and contro…
Reducing risks by transforming landscapes: Cross-scale effects of land-use changes on ecosystem services	INT-252-3	70.2a	Agroforestry/forest garden. Farmers reforested some less productive fields by allowing natural regeneration to occur or planting teak and mahogany (Table 2, L4). This land-use change spread during the early 2000s, when farmers reported more frequent harvest losses because of foraging by monkeys and wild boars at the village margins. - abandon less productive croplands on slopes - plant or assist …	Combination	Positive	Planting cropland with trees increased tree species richness from 0 to a mean of about 3.5 tree species.	Plants	Trees	E.g. Acacia spp. and Pterocarpus spp. Products; teak (Tectona grandis) or mahogany (Swietenia macrophylla)	Unclear	Include	Mean spp richness across 400m2 plots		3.5	0					24	0	CI	1.18	0	SD	Not given	Not given	Significant	Pos sig	Impact/control	a) The figure legends of fig 3 and 4 are reversed in the paper. I extracted data from figure 4 on biodiversity, and cross-checked with data from Table S2, which also contains SD data. b) Spatial and temporal scales will vary greatly, and were not given, since plots are scattered widely and not implemented by the same actors. c) Spp richness assumed to be sig different between treatment and contro…
Revival of traditional best practices for rangeland restoration under climate change in the dry areas A case study from Southern Tunisia	INT-240-1	77c	Traditional grazing practices...the rest technique locally called gdel as a common practice for many centuries...Gdel is based on the principle of leaving the rangeland in rest (without grazing) to reconstitute its plant coverâ€¦. Sites left to rest by protecting from grazing for up to 3 yrs then exposed to short duration grazing of 1 to 2 years. The authors conclude that a rest period of 2 years…	Combination	Mixed	Species richness was higher in the intervention sites than the grazed sites (highest after 3 year's of intervention (rest) at 32 species, and lowest at the freely grazed site (control) with 16 species). "Species richness remained almost constant in the controlled grazing [rest site], but it declined in the free grazed treatment." But "Grazing for one year can enhance the establishment and growth …	Plants	Grasses & other plants	Annual and perennial plants	Unclear	Include	Species richness within entire plot 'counting all perennial and annual species within the experimental plots' - the authors suggest it was not restricted to the quadrats (that were used for assessing plant density), but it might have been assessed along the three random 50m transects in each experimental plot		32	16			14 perennials + 18 annuals	9 perennials + 7 annuals	1	1	CI			Insufficient data	100	3	Not tested	Not tested	Impact/control	a) The intervention here is the 3 years of rest (i.e. the longest that a plot was given a rest from grazing for), so the spatial scale is the no. ha of this site; the control site (with intense grazing) had a much larger spatial scale (7000 ha)
